# Supplementary material for: The core metabolome and exudation dynamics of three phylogenetically distinct plant species
Source: Research Square preprint supplement (doi:10.21203/rs.3.rs-1862042/v1), 2022-07-25
Supplement: Supplementary file 1 [file b1ffc62d2a4cd07ed255089e.xlsx]

## Sheet: Timecourse
COMPOUND ANNOTATION										COMPOUND IDENTIFICATION SCORES									MS1 INTENSITY INFORMATION			MSMS INFORMATION				MSMS EVALUATION	ION INFORMATION			M/Z EVALUATION		CHROMATOGRAPHIC PEAK INFORMATION				RT EVALUATION	group	Arabidopsis-00h	Arabidopsis-00h	Arabidopsis-00h	Arabidopsis-00h	Arabidopsis-02h	Arabidopsis-02h	Arabidopsis-02h	Arabidopsis-02h	Arabidopsis-04h	Arabidopsis-04h	Arabidopsis-04h	Arabidopsis-04h
Compound #	Identified Metabolite	Use for peak height comparisons?	Name of metabolite searched for	Labels of Overlapping Compounds	Inchi Keys of Overlapping Compounds	Molecular Formula	Polarity	Exact Mass	Inchi Key	MSMS Score (0 to 1)	m/z score (0 to 1)	RT score (0 to 1)	Total ID Score (0 to 3)	Mass Spec Inititative Identification Level	Isomer details	Identification notes	MS1 notes	MS2 notes	Maximum MS1 intensity across all files	Filename w/ maximum MS1	Retention time of max intensity MS1 peak	File with highest MSMS match score	RT of highest matched MSMS scan	Number of ion matches in msms spectra to EMA reference spectra	List of ion matches in msms spectra to EMA reference spectra		Adduct	Theoretical m/z	Measured m/z	mass error (delta Da)	mass error (delta ppm)	Minimum retention time (min)	Maximum retention time (max)	Theoretical retention time (peak)	Detected RT (peak)	RT error (absolute delta)	rep	1	2	3	4	1	2	3	4	1	2	3	4
Unique for study	Some isomers are not chromatographically or spectrally resolvable.		Name of standard reference compound in library match.	compound with similar mz (abs difference <= 0.005) or monoisotopic molecular weight (abs difference <= 0.005) and RT (min or max within the RT-min-max-range of similar compound)	List of inchi keys that correspond to the compounds listed in the previous column			monoisotopic mass (neutral except for permanently charged molecules)	neutralized version	1 (MSMS matches ref. std.), 0.5 (possible match), 0 (no MSMS collected or no appropriate ref available), -1 (bad match)	Cutoff of 20PPM used for negative polarity mode and 10PPM used for positive polarity mode, any outliners from m/z vs ppm correlation were removed from results. All delta m/z < 0.002 (NOTE: neg mass accuracy is not as good as pos) mz_quality	1 (delta RT </= 0.5), 0.5 (delta RT > 0.5 & </= 2), 0 (delta RT > 2 min)	sum of m/z, RT and MSMS score	Level 1 Metabolite ID At least two independent and orthogonal properties (m/z, RT and/or MSMS) match one reference standard; unknown isomers with same RT and/or MSMS may be contributing to peak intensity Level 2 Putative compound No reference standard available, but matches physiochemical properties of a compound and/or spectral similarity to public MS2 repository Level 3 Putative class No refere…	Isomers have same formula (and m/z) and similar RT - MSMS spectra may be used to differentiate (exceptions) or RT elution order									mean # of fragment ions matching between compound in sample and reference compound / standard; may include parent and isotope ions and very low intensity background ions (these do not contribute to score)		MSMS score (highest across all samples), scale of 0 to 1 based on an algorithm. 0 = no match, 1 = perfect match. If no score, then no MSMS was acquired for that compound (@ m/z & RT window).	More than one may be detectable; the one evaluated is listed	theoretical m/z for a given compound / adduct pair	average m/z within 20ppm of theoretical detected across all samples @ RT peak	absolute difference between theoretical and detected m/z	ppm difference between theoretical and detected m/z	Retention range including start and end of detection of an m/z value (Note: Peak Height is calculated as the highest intensity of an m/z within the min/max RT range. Peak Area is calculated as the integrated area under the curve for an m/z within the mix/max RT range.)		theoretical retention time for a compound based upon reference standard at highest intensity point of peak	average retention time for a detected compound at highest intensity point of peak across all samples	absolute difference between theoretical and detected RT peak	neg file	20180711_JJ_JS_Wildermuth_TimeCrs2_171231_QE119_683775-924_USHXG01081_NEG_MSMS-v2_Arabidopsis-00h-1_IR002__104.h5	20180711_JJ_JS_Wildermuth_TimeCrs2_171231_QE119_683775-924_USHXG01081_NEG_MSMS-v2_Arabidopsis-00h-2_IR002__135.h5	20180711_JJ_JS_Wildermuth_TimeCrs2_171231_QE119_683775-924_USHXG01081_NEG_MSMS-v2_Arabidopsis-00h-3_IR002_rerun_361.h5	20180711_JJ_JS_Wildermuth_TimeCrs2_171231_QE119_683775-924_USHXG01081_NEG_MSMS-v2_Arabidopsis-00h-4_IR002__095.h5	20180711_JJ_JS_Wildermuth_TimeCrs2_171231_QE119_683775-924_USHXG01081_NEG_MSMS-v2_Arabidopsis-02h-1_IR002__032.h5	20180711_JJ_JS_Wildermuth_TimeCrs2_171231_QE119_683775-924_USHXG01081_NEG_MSMS-v2_Arabidopsis-02h-2_IR002__132.h5	20180711_JJ_JS_Wildermuth_TimeCrs2_171231_QE119_683775-924_USHXG01081_NEG_MSMS-v2_Arabidopsis-02h-3_IR002__150.h5	20180711_JJ_JS_Wildermuth_TimeCrs2_171231_QE119_683775-924_USHXG01081_NEG_MSMS-v2_Arabidopsis-02h-4_IR002_rerun_331.h5	20180711_JJ_JS_Wildermuth_TimeCrs2_171231_QE119_683775-924_USHXG01081_NEG_MSMS-v2_Arabidopsis-04h-1_IR002__038.h5	20180711_JJ_JS_Wildermuth_TimeCrs2_171231_QE119_683775-924_USHXG01081_NEG_MSMS-v2_Arabidopsis-04h-2_IR002_rerun_346.h5	20180711_JJ_JS_Wildermuth_TimeCrs2_171231_QE119_683775-924_USHXG01081_NEG_MSMS-v2_Arabidopsis-04h-3_IR002__156.h5	20180711_JJ_JS_Wildermuth_TimeCrs2_171231_QE119_683775-924_USHXG01081_NEG_MSMS-v2_Arabidopsis-04h-4_IR002__092.h5
index	identified_metabolite		label	overlapping_compound	overlapping_inchi_keys	formula	polarity	exact_mass	inchi_key	msms_quality	mz_quality	rt_quality	total_score	msi_level	isomer_details	identification_notes	ms1_notes	ms2_notes	max_intensity	max_intensity_file	ms1_rt_peak	msms_file	msms_rt	msms_numberofions	msms_matchingions	msms_score	mz_adduct	mz_theoretical	mz_measured	mz_error	mz_ppmerror	rt_min	rt_max	rt_theoretical	rt_measured	rt_error	pos file	20180711_JJ_JS_Wildermuth_TimeCrs2_171231_QE119_683775-924_USHXG01081_POS_MSMS-v2_Arabidopsis-00h-1_IR001__103.h5	20180711_JJ_JS_Wildermuth_TimeCrs2_171231_QE119_683775-924_USHXG01081_POS_MSMS-v2_Arabidopsis-00h-2_IR001__134.h5	20180711_JJ_JS_Wildermuth_TimeCrs2_171231_QE119_683775-924_USHXG01081_POS_MSMS-v2_Arabidopsis-00h-3_IR001_rerun_360.h5	20180711_JJ_JS_Wildermuth_TimeCrs2_171231_QE119_683775-924_USHXG01081_POS_MSMS-v2_Arabidopsis-00h-4_IR001__094.h5	20180711_JJ_JS_Wildermuth_TimeCrs2_171231_QE119_683775-924_USHXG01081_POS_MSMS-v2_Arabidopsis-02h-1_IR001__031.h5	20180711_JJ_JS_Wildermuth_TimeCrs2_171231_QE119_683775-924_USHXG01081_POS_MSMS-v2_Arabidopsis-02h-2_IR001__131.h5	20180711_JJ_JS_Wildermuth_TimeCrs2_171231_QE119_683775-924_USHXG01081_POS_MSMS-v2_Arabidopsis-02h-3_IR001__149.h5	20180711_JJ_JS_Wildermuth_TimeCrs2_171231_QE119_683775-924_USHXG01081_POS_MSMS-v2_Arabidopsis-02h-4_IR001_rerun_330.h5	20180711_JJ_JS_Wildermuth_TimeCrs2_171231_QE119_683775-924_USHXG01081_POS_MSMS-v2_Arabidopsis-04h-1_IR001__037.h5	20180711_JJ_JS_Wildermuth_TimeCrs2_171231_QE119_683775-924_USHXG01081_POS_MSMS-v2_Arabidopsis-04h-2_IR001_rerun_345.h5	20180711_JJ_JS_Wildermuth_TimeCrs2_171231_QE119_683775-924_USHXG01081_POS_MSMS-v2_Arabidopsis-04h-3_IR001__155.h5	20180711_JJ_JS_Wildermuth_TimeCrs2_171231_QE119_683775-924_USHXG01081_POS_MSMS-v2_Arabidopsis-04h-4_IR001__091.h5
1	2-hydroxypyridine	Yes	2-hydroxypyridine			C5H5NO	positive	95.0371	UBQKCCHYAOITMY-UHFFFAOYSA-N	1	1	1	3	Level 1+					16722014	20180711_JJ_JS_Wildermuth_TimeCrs2_171231_QE119_683775-924_USHXG01081_POS_MSMS-v2_Arabidopsis-00h-4_IR001__094.h5	1.19712	20180711_JJ_JS_Wildermuth_TimeCrs2_171231_QE119_683775-924_USHXG01081_POS_MSMS-v2_Arabidopsis-00h-2_IR001__134.h5	1.16	2	78.035,96.045	0.7275	[M+H]+	96.0444	96.0452	0.0007	7.8044	1.1	1.19	1.2	1.14	0.06	0001_2-HYDROXYPYRIDINE_positive_M+H96p0444_1p20	78866850	111607680	6.21938e+06	167220140	1.61403e+06	1.74248e+06	2.64527e+06	40676770	20955040	4.48291e+06	2.1543e+06	2.36115e+06
11	2'-deoxyadenosine	Yes	2'-deoxyadenosine			C10H13N5O3	positive	251.102	OLXZPDWKRNYJJZ-RRKCRQDMSA-N	1	1	1	3	Level 1+					16563884	20180711_JJ_JS_Wildermuth_TimeCrs2_171231_QE119_683775-924_USHXG01081_POS_MSMS-v2_Medicago-p5h-2_IR001__167.h5	2.07433	20180711_JJ_JS_Wildermuth_TimeCrs2_171231_QE119_683775-924_USHXG01081_POS_MSMS-v2_Medicago-p5h-2_IR001__167.h5	2.06	8	69.034,71.050,73.029,81.035,99.045,117.055,136.062,252.109	0.8472	[M+H]+	252.109	252.109	0	0.1198	1.85	2.16	2.07	2.01	0.06	0011_2deoxyadenosine_positive_M+H252p1091_2p07	21120.2	34009.8	10889.4	63519.5	10730.9	7419.86	12517.2	10449.5	6592.72	53151.6	6793.77	5948.82
29	2'-deoxyguanosine	Yes	2'-deoxyguanosine			C10H13N5O4	positive	267.097	YKBGVTZYEHREMT-KVQBGUIXSA-N	1	1	1	3	Level 1+					1.83598e+06	20180711_JJ_JS_Wildermuth_TimeCrs2_171231_QE119_683775-924_USHXG01081_POS_MSMS-v2_Brachy-00h-2_IR001__118.h5	6.64295	20180711_JJ_JS_Wildermuth_TimeCrs2_171231_QE119_683775-924_USHXG01081_POS_MSMS-v2_Brachy-p5h-3_IR001__061.h5	6.23	2	117.055,152.057	0.9649	[M+H]+	268.104	268.104	0.0001	0.2589	6.04	6.4	6.64	6.28	0.36	0029_2deoxyguanosine_positive_M+H268p1041_6p64	96912.8	94889.3	52602.3	88745.4	79402.7	111412	86152.8	36208.2	89162.1	58417.3	88207.3	84875.9
28	3-methoxytyramine	Yes	3-methoxytyramine			C9H13NO2	positive	167.095	DIVQKHQLANKJQO-UHFFFAOYSA-N	0	1	1	2	Level 1				not collected	1.23733e+06	20180711_JJ_JS_Wildermuth_TimeCrs2_171231_QE119_683775-924_USHXG01081_POS_MSMS-v2_Brachy-4d-3_IR001_rerun_321.h5	6.05829						[M+H]+	168.102	168.102	0.0001	0.858	5.47	5.8	6.06	5.63	0.42	0028_42-Aminoethyl2-methoxyphenol_positive_M+H168p1019_6p06	117209	177263	40497.5	99196.7	739253	39572.9	27506.6	28027.2	27024.8	29614.9	18510.7	25644.3
18	3-methyladenine	Yes	3-methyladenine			C6H7N5	positive	149.07	FSASIHFSFGAIJM-UHFFFAOYSA-N	1	1	1	3	Level 1+					43679864	20180711_JJ_JS_Wildermuth_TimeCrs2_171231_QE119_683775-924_USHXG01081_POS_MSMS-v2_Medicago-p5h-2_IR001__167.h5	3.44234	20180711_JJ_JS_Wildermuth_TimeCrs2_171231_QE119_683775-924_USHXG01081_POS_MSMS-v2_Medicago-04h-3_IR001_rerun_354.h5	3.24	2	133.051,150.077	0.9769	[M+H]+	150.077	150.077	0.0001	0.3709	3.12	3.35	3.44	3.21	0.24	0018_3-methyladenine_positive_M+H150p0774_3p44	115263	311925	99042.4	83462.3	277227	8227500	320485	170469	773031	485097	254195	401686
54	4-aminobutanoic acid	Yes	4-aminobutanoic acid			C4H9NO2	positive	103.063	BTCSSZJGUNDROE-UHFFFAOYSA-N	1	1	1	3	Level 1+					180738848	20180711_JJ_JS_Wildermuth_TimeCrs2_171231_QE119_683775-924_USHXG01081_POS_MSMS-v2_Medicago-1d-2_IR001__369.h5	13.9763	20180711_JJ_JS_Wildermuth_TimeCrs2_171231_QE119_683775-924_USHXG01081_POS_MSMS-v2_Arabidopsis-1d-4_IR001__218.h5	13.7	6	68.051,69.035,86.061,87.045,104.071,104.108	0.9645	[M+H]+	104.071	104.071	0.0006	6.082	13.66	13.97	13.98	13.8	0.18	0054_4-aminobutyric_acid_positive_M+H104p0706_13p98	80346100	55816830	68865900	62415990	3.49413e+06	217269740	170988300	148334230	482639320	446944880	106582630	272846200
52	4-guanidinobutanoic acid	Yes	4-guanidinobutanoic acid			C5H11N3O2	positive	145.085	TUHVEAJXIMEOSA-UHFFFAOYSA-N	1	1	1	3	Level 1+					202529408	20180711_JJ_JS_Wildermuth_TimeCrs2_171231_QE119_683775-924_USHXG01081_POS_MSMS-v2_Medicago-4d-1_IR001__016.h5	13.4915	20180711_JJ_JS_Wildermuth_TimeCrs2_171231_QE119_683775-924_USHXG01081_POS_MSMS-v2_Medicago-02h-1_IR001__387.h5	13.37	9	60.057,69.034,86.061,87.045,104.071,111.056,128.082,129.066,146.092	0.9345	[M+H]+	146.092	146.093	0.0002	1.2284	13.08	13.4	13.49	13.31	0.18	0052_4-Guanidinobutyric_acid_positive_M+H146p0924_13p49	476213	653299	219106	763315	1.3932e+06	181570	194147	229301	367828	635841	197955	269320
5	4-hydroxybenzoic acid	Yes	4-hydroxybenzoic acid			C7H6O3	negative	138.032	FJKROLUGYXJWQN-UHFFFAOYSA-N	1	1	1	3	Level 1+					10373385	20180711_JJ_JS_Wildermuth_TimeCrs2_171231_QE119_683775-924_USHXG01081_NEG_MSMS-v2_Medicago-4d-2_IR002__047.h5	1.59419	20180711_JJ_JS_Wildermuth_TimeCrs2_171231_QE119_683775-924_USHXG01081_NEG_MSMS-v2_Medicago-4d-2_IR002__047.h5	1.47	2	93.033,137.023	0.9967	[M-H]-	137.024	137.023	0.0015	10.9423	1.4	1.74	1.59	1.54	0.05	0005_4-HYDROXYBENZOIC_ACID_negative_M-H137p0244_1p59	2.16647e+06	2.35088e+06	1.20437e+06	3.70308e+06	13792850	2.48421e+06	3.18063e+06	2.41886e+06	5.38596e+06	3.4811e+06	2.87047e+06	4.60569e+06
51	4-imidazoleacetic acid	Yes	4-imidazoleacetic acid			C5H6N2O2	positive	126.043	PRJKNHOMHKJCEJ-UHFFFAOYSA-N	1	1	1	3	Level 1+					6414790	20180711_JJ_JS_Wildermuth_TimeCrs2_171231_QE119_683775-924_USHXG01081_POS_MSMS-v2_Medicago-4d-1_IR001__016.h5	13.2445	20180711_JJ_JS_Wildermuth_TimeCrs2_171231_QE119_683775-924_USHXG01081_POS_MSMS-v2_Brachy-4d-1_IR001__137.h5	12.7	2	81.046,127.051	0.9912	[M+H]+	127.05	127.051	0.0004	2.9134	12.64	12.94	13.24	12.79	0.45	0051_Imidazole-4-acetic_acid_positive_M+H127p0502_13p24	39146	39206.3	68662.2	48670.6	191701	20400.7	19468.8	100312	27925.6	63725.1	18530.8	26216.9
14	4-pyridoxic acid	Yes	4-pyridoxic acid			C8H9NO4	positive	183.053	HXACOUQIXZGNBF-UHFFFAOYSA-N	1	1	1	3	Level 1+					2989495	20180711_JJ_JS_Wildermuth_TimeCrs2_171231_QE119_683775-924_USHXG01081_POS_MSMS-v2_Brachy-4d-2_IR001__164.h5	2.70905	20180711_JJ_JS_Wildermuth_TimeCrs2_171231_QE119_683775-924_USHXG01081_POS_MSMS-v2_Brachy-4d-1_IR001__137.h5	2.75	4	138.055,148.039,166.050,184.060	0.8671	[M+H]+	184.06	184.061	0.0005	2.6293	2.36	2.85	2.71	2.63	0.08	0014_4-Pyridoxic_acid_positive_M+H184p0605_2p71	49555.6	53555.4	28505.2	48059.3	201744	30599.7	31999	14655.2	43041.3	29725.1	22807.4	51477.3
23	4-quinolinecarboxylic acid	Yes	4-quinolinecarboxylic acid			C10H7NO2	positive	173.048	VQMSRUREDGBWKT-UHFFFAOYSA-N	1	1	1	3	Level 1+					236835840	20180711_JJ_JS_Wildermuth_TimeCrs2_171231_QE119_683775-924_USHXG01081_POS_MSMS-v2_Medicago-4d-1_IR001__016.h5	5.21333	20180711_JJ_JS_Wildermuth_TimeCrs2_171231_QE119_683775-924_USHXG01081_POS_MSMS-v2_Brachy-1d-1_IR001__115.h5	5.22	2	146.060,174.055	0.9808	[M+H]+	174.055	174.055	0.0004	2.0131	4.65	5.76	5.21	5.28	0.06	0023_Quinoline-4-carboxylic_acid_positive_M+H174p0550_5p21	376091	829867	140889	758694	189065	126904	146258	45383.6	130135	91686.8	81594.7	132492
21	5-methylcytosine	Yes	5-methylcytosine			C5H7N3O	positive	125.059	LRSASMSXMSNRBT-UHFFFAOYSA-N	1	1	1	3	Level 1+					192873136	20180711_JJ_JS_Wildermuth_TimeCrs2_171231_QE119_683775-924_USHXG01081_POS_MSMS-v2_Medicago-1d-2_IR001__369.h5	4.20397	20180711_JJ_JS_Wildermuth_TimeCrs2_171231_QE119_683775-924_USHXG01081_POS_MSMS-v2_Brachy-4d-3_IR001__254.h5	4.46	7	54.035,56.050,81.045,83.061,108.056,109.040,126.067	0.9395	[M+H]+	126.066	126.067	0.0004	3.424	4.3	4.7	4.2	4.44	0.23	0021_5-Methylcytosine_positive_M+H126p0662_4p20	236828	434841	114626	313575	1.90645e+06	469128	352575	105447	308973	231023	189541	382735
5	5'-deoxyadenosine	Yes	5'-deoxyadenosine			C10H13N5O3	positive	251.102	XGYIMTFOTBMPFP-KQYNXXCUSA-N	1	1	1	3	Level 1+					9851752	20180711_JJ_JS_Wildermuth_TimeCrs2_171231_QE119_683775-924_USHXG01081_POS_MSMS-v2_Medicago-1d-2_IR001__369.h5	1.65018	20180711_JJ_JS_Wildermuth_TimeCrs2_171231_QE119_683775-924_USHXG01081_POS_MSMS-v2_Medicago-1d-2_IR001__369.h5	1.65	3	73.029,136.062,252.108	0.8481	[M+H]+	252.109	252.109	0.0001	0.4888	1.57	1.79	1.65	1.7	0.05	0005_5deoxyadenosine_positive_M+H252p1091_1p65	0	14981	16193.2	18867.7	743352	22884.4	16545.3	23520	17189.1	24502.9	11048.6	31106.2
4	5'-methylthioadenosine	Yes	5'-methylthioadenosine			C11H15N5O3S	positive	297.09	WUUGFSXJNOTRMR-IOSLPCCCSA-N	1	1	1	3	Level 1+					16307336	20180711_JJ_JS_Wildermuth_TimeCrs2_171231_QE119_683775-924_USHXG01081_POS_MSMS-v2_Medicago-4d-2_IR001__046.h5	1.48939	20180711_JJ_JS_Wildermuth_TimeCrs2_171231_QE119_683775-924_USHXG01081_POS_MSMS-v2_Medicago-1d-2_IR001__369.h5	1.53	9	61.011,69.034,75.027,97.029,103.021,136.062,145.032,163.042,298.097	0.8798	[M+H]+	298.097	298.097	0.0002	0.7839	1.46	1.68	1.49	1.54	0.05	0004_Methylthioadenosine_positive_M+H298p0969_1p49	139422	232679	298208	136952	667174	373697	248577	259067	309778	280268	325724	152331
6	acetylcholine	Yes	acetylcholine			C7H16NO2+	positive	146.118	OIPILFWXSMYKGL-UHFFFAOYSA-N	1	1	1	3	Level 1+				co-isolated precursor, but all ref ions in sample	13176048	20180711_JJ_JS_Wildermuth_TimeCrs2_171231_QE119_683775-924_USHXG01081_POS_MSMS-v2_Arabidopsis-1d-2_IR001_rerun_336.h5	1.80267	20180711_JJ_JS_Wildermuth_TimeCrs2_171231_QE119_683775-924_USHXG01081_POS_MSMS-v2_Arabidopsis-1d-2_IR001_rerun_336.h5	1.67	4	60.082,87.045,88.040,146.117	0.5306	[M]+	146.118	146.118	0.0002	1.6859	1.67	1.97	1.8	1.84	0.04	0006_acetylcholine_positive_M146p1176_1p80	1.35089e+06	792719	1.10466e+06	275508	188432	1.34141e+06	931049	1.8154e+06	2.66234e+06	5.06209e+06	612524	1.48498e+06
12	adenine	Yes	adenine			C5H5N5	positive	135.054	GFFGJBXGBJISGV-UHFFFAOYSA-N	1	1	1	3	Level 1+			split peak, external standard is right between the two, there are known insource fragments from other compounds (ex. deoxyadenosine, methyladenosine, adenosine), however those are at RT outside the min / max bounds.		376192992	20180711_JJ_JS_Wildermuth_TimeCrs2_171231_QE119_683775-924_USHXG01081_POS_MSMS-v2_Brachy-4d-3_IR001_rerun_321.h5	2.38743	20180711_JJ_JS_Wildermuth_TimeCrs2_171231_QE119_683775-924_USHXG01081_POS_MSMS-v2_Medicago-00h-4_IR001__281.h5	2.75	2	119.036,136.062	0.9666	[M+H]+	136.062	136.062	0.0002	1.8314	2.16	2.89	2.39	2.35	0.04	0012_adenine_positive_M+H136p0618_2p39	288257080	900593680	585181040	387921480	1303371760	2408513760	1256086240	534913440	2136879360	1780664160	616200040	665772280
15	adenosine	Yes	adenosine			C10H13N5O4	positive	267.097	OIRDTQYFTABQOQ-KQYNXXCUSA-N	1	1	1	3	Level 1+					316103552	20180711_JJ_JS_Wildermuth_TimeCrs2_171231_QE119_683775-924_USHXG01081_POS_MSMS-v2_Medicago-1d-2_IR001__369.h5	2.88577	20180711_JJ_JS_Wildermuth_TimeCrs2_171231_QE119_683775-924_USHXG01081_POS_MSMS-v2_Medicago-00h-2_IR001__100.h5	2.61	4	57.034,85.029,136.062,268.104	0.8875	[M+H]+	268.104	268.104	0.0001	0.4893	2.41	2.96	2.89	2.72	0.17	0015_adenosine_positive_M+H268p1041_2p89	96281870	126966980	112602640	79356400	82726330	672502080	349780680	277714000	504731400	565711600	310455240	353623320
11	alpha-hydroxyisobutyric acid	Yes	alpha-hydroxyisobutyric acid			C4H8O3	negative	104.047	BWLBGMIXKSTLSX-UHFFFAOYSA-N	1	1	1	3	Level 1+					3.75085e+06	20180711_JJ_JS_Wildermuth_TimeCrs2_171231_QE119_683775-924_USHXG01081_NEG_MSMS-v2_Arabidopsis-04h-1_IR002__038.h5	2.53313	20180711_JJ_JS_Wildermuth_TimeCrs2_171231_QE119_683775-924_USHXG01081_NEG_MSMS-v2_Arabidopsis-02h-2_IR002__132.h5	2.23	4	57.033,59.012,85.028,103.038	0.6265	[M-H]-	103.04	103.038	0.0016	15.2043	2.02	2.29	2.53	2.13	0.4	0011_2-HYDROXYISOBUTYRIC_ACID_negative_M-H103p0400_2p53	48428.1	45724.6	74380.6	45747.6	32802.4	746331	654156	215714	3.75085e+06	1.33014e+06	320288	2.02465e+06
4	an hydroxycinnamic acid	Yes	2-hydroxycinnamic acid	2-hydroxycinnamic acid//4-coumaric acid	PMOWTIHVNWZYFI-AATRIKPKSA-N//NGSWKAQJJWESNS-ZZXKWVIFSA-N	C9H8O3	negative	164.047	PMOWTIHVNWZYFI-AATRIKPKSA-N	1	1	1	3	Level 1+					14686095	20180711_JJ_JS_Wildermuth_TimeCrs2_171231_QE119_683775-924_USHXG01081_NEG_MSMS-v2_Arabidopsis-4d-4_IR002__391.h5	1.48717	20180711_JJ_JS_Wildermuth_TimeCrs2_171231_QE119_683775-924_USHXG01081_NEG_MSMS-v2_Arabidopsis-02h-4_IR002__264.h5	1.38	2	119.048,163.039	0.9775	[M-H]-	163.04	163.039	0.0013	8.0902	1.28	1.6	1.49	1.51	0.02	0004_2-Hydroxycinnamic_acid_negative_M-H163p0400_1p49	302572	273803	254035	329282	401199	2.61995e+06	1.8624e+06	731147	46116020	2.28198e+06	1.12083e+06	2.53907e+06
8	azelaic acid and unresolvable, unidentified isomers	Yes	azelaic acid			C9H16O4	negative	188.105	BDJRBEYXGGNYIS-UHFFFAOYSA-N	1	1	1	3	Level 1+			multiple unresolvable peaks		3.36224e+06	20180711_JJ_JS_Wildermuth_TimeCrs2_171231_QE119_683775-924_USHXG01081_NEG_MSMS-v2_Medicago-1d-2_IR002__370.h5	1.98126	20180711_JJ_JS_Wildermuth_TimeCrs2_171231_QE119_683775-924_USHXG01081_NEG_MSMS-v2_Medicago-1d-4_IR002__201.h5	1.73	5	57.033,97.064,123.080,125.096,187.096	0.842	[M-H]-	187.098	187.096	0.001	5.6022	1.56	2.23	1.98	1.82	0.16	0008_azelaic_acid_negative_M-H187p0976_1p98	745504	350435	114719	489922	374874	250596	321369	124518	520221	143859	359418	518661
34	betaine	Yes	betaine			C5H12NO2+	positive	118.086	KWIUHFFTVRNATP-UHFFFAOYSA-O	1	1	1	3	Level 1+					768650880	20180711_JJ_JS_Wildermuth_TimeCrs2_171231_QE119_683775-924_USHXG01081_POS_MSMS-v2_Medicago-1d-2_IR001__369.h5	7.6527	20180711_JJ_JS_Wildermuth_TimeCrs2_171231_QE119_683775-924_USHXG01081_POS_MSMS-v2_TxCtrl-4d-1_IR001__188.h5	7.71	3	58.066,59.074,118.087	0.9711	[M]+	118.086	118.087	0.0005	3.9451	7.37	7.82	7.65	7.49	0.16	0034_TRIMETHYL_GLYCINE_positive_M118p0863_7p65	1552213120	2581639840	1615410400	1472431520	1147726240	2543256320	1800875520	1383210400	1714757280	1459812160	2165404800	1880161120
37	bis(3-aminopropyl)amine	Yes	bis(3-aminopropyl)amine			C6H17N3	positive	131.142	OTBHHUPVCYLGQO-UHFFFAOYSA-N	1	1	1	3	Level 1+					16718707	20180711_JJ_JS_Wildermuth_TimeCrs2_171231_QE119_683775-924_USHXG01081_POS_MSMS-v2_Brachy-04h-3_IR001__010.h5	8.69918	20180711_JJ_JS_Wildermuth_TimeCrs2_171231_QE119_683775-924_USHXG01081_POS_MSMS-v2_Arabidopsis-00h-3_IR001_rerun_360.h5	8.58	2	111.081,129.105	0.9569	[M-H+2Na]+	176.113	176.114	0.0003	1.8975	8.14	8.83	8.7	8.45	0.25	0037_Norspermidine_positive_M-H+2Na176p1133_8p70	81297420	6.63895e+06	2.79408e+06	94989550	95699040	52960760	5.91552e+06	4.58915e+06	124175480	7.77346e+06	60777890	74269600
13	caffeic acid	Yes	caffeic acid			C9H8O4	negative	180.042	QAIPRVGONGVQAS-RQOWECAXSA-N	1	1	1	3	Level 1+					4.12951e+06	20180711_JJ_JS_Wildermuth_TimeCrs2_171231_QE119_683775-924_USHXG01081_NEG_MSMS-v2_Arabidopsis-00h-4_IR002__095.h5	3.12644	20180711_JJ_JS_Wildermuth_TimeCrs2_171231_QE119_683775-924_USHXG01081_NEG_MSMS-v2_Arabidopsis-4d-4_IR002__391.h5	2.89	2	135.044,179.034	0.793	[M-H]-	179.035	179.034	0.0006	3.6228	2.8	2.96	3.13	2.87	0.25	0013_Caffeicacid_negative_M-H179p0350_3p13	1.72168e+06	2.35582e+06	2.11033e+06	4.12951e+06	447077	4032300	586480	775614	631009	719007	500838	654717
47	carnitine	Yes	carnitine			C7H16NO3+	positive	162.112	PHIQHXFUZVPYII-ZCFIWIBFSA-O	1	1	1	3	Level 1+					9619568	20180711_JJ_JS_Wildermuth_TimeCrs2_171231_QE119_683775-924_USHXG01081_POS_MSMS-v2_Medicago-1d-2_IR001__369.h5	12.9121	20180711_JJ_JS_Wildermuth_TimeCrs2_171231_QE119_683775-924_USHXG01081_POS_MSMS-v2_TxCtrl-1d-3_IR001__378.h5	12.67	5	60.082,85.029,102.092,103.039,162.112	0.9384	[M]+	162.113	162.113	0.0002	1.406	12.39	12.87	12.91	12.72	0.19	0047_CHEBI_39547_positive_M162p1125_12p91	164718	84848.7	45552.1	89105.2	55705.3	723180	134972	424444	170156	179453	149207	157138
20	choline o-sulfuric acid	Yes	choline o-sulfuric acid			C5H14NO4S+	positive	184.064	WXCQAWGXWVRCGP-UHFFFAOYSA-O	1	1	1	3	Level 1+					5753381	20180711_JJ_JS_Wildermuth_TimeCrs2_171231_QE119_683775-924_USHXG01081_POS_MSMS-v2_TxCtrl-4d-3_IR001__236.h5	4.06873	20180711_JJ_JS_Wildermuth_TimeCrs2_171231_QE119_683775-924_USHXG01081_POS_MSMS-v2_TxCtrl-04h-3_IR001__384.h5	3.76	2	104.107,184.064	0.9283	[M]+	184.064	184.064	0.0001	0.436	3.56	3.86	4.07	3.71	0.35	0020_Untitled_positive_M184p0638_4p07	294880	189030	49395	132752	36040.3	104525	63505.1	31152.4	72097.6	20401	66870.3	81405.4
22	cytosine	Yes	cytosine			C4H5N3O	positive	111.043	OPTASPLRGRRNAP-UHFFFAOYSA-N	1	1	1	3	Level 1+			RT shift but confirmed by external standard		46648912	20180711_JJ_JS_Wildermuth_TimeCrs2_171231_QE119_683775-924_USHXG01081_POS_MSMS-v2_Arabidopsis-00h-2_IR001__134.h5	4.62469	20180711_JJ_JS_Wildermuth_TimeCrs2_171231_QE119_683775-924_USHXG01081_POS_MSMS-v2_Arabidopsis-02h-2_IR001__131.h5	4.29	4	69.046,94.040,95.025,112.051	0.9713	[M+H]+	112.051	112.051	0.0006	5.322	4.13	4.44	4.62	4.24	0.38	0022_cytosine_positive_M+H112p0506_4p62	260911600	466489120	35513540	366421440	10956740	99529870	44035020	4.3924e+06	4.21991e+06	2.14551e+06	37120020	25774510
48	deoxycarnitine	Yes	deoxycarnitine			C7H16NO2+	positive	146.118	JHPNVNIEXXLNTR-UHFFFAOYSA-O	1	1	1	3	Level 1+					15728800	20180711_JJ_JS_Wildermuth_TimeCrs2_171231_QE119_683775-924_USHXG01081_POS_MSMS-v2_Arabidopsis-1d-2_IR001_rerun_336.h5	13.0694	20180711_JJ_JS_Wildermuth_TimeCrs2_171231_QE119_683775-924_USHXG01081_POS_MSMS-v2_Arabidopsis-4d-4_IR001__390.h5	13.05	3	60.082,87.045,146.118	0.9575	[M]+	146.118	146.118	0.0002	1.4001	12.7	13.16	13.07	12.92	0.15	0048_gamma-butyrobetaine_positive_M146p1176_13p07	931898	18150040	1.70493e+06	889761	46894.4	2.02443e+06	1.66781e+06	1.3624e+06	2.89305e+06	3.35775e+06	1.56307e+06	22403490
25	deoxycytidine	Yes	deoxycytidine			C9H13N3O4	positive	227.091	CKTSBUTUHBMZGZ-SHYZEUOFSA-N	1	1	1	3	Level 1+					67499880	20180711_JJ_JS_Wildermuth_TimeCrs2_171231_QE119_683775-924_USHXG01081_POS_MSMS-v2_Medicago-1d-2_IR001__369.h5	5.3869	20180711_JJ_JS_Wildermuth_TimeCrs2_171231_QE119_683775-924_USHXG01081_POS_MSMS-v2_Medicago-p5h-2_IR001__167.h5	4.94	2	112.051,117.055	0.9625	[M+H]+	228.098	228.098	0.0002	0.7992	4.74	5.24	5.39	4.92	0.47	0025_2deoxycytidine_positive_M+H228p0979_5p39	230611	199082	257639	299140	1.98389e+06	331840	236556	470383	717004	950398	180190	555341
7	dethiobiotin	Yes	dethiobiotin			C10H18N2O3	positive	214.132	AUTOLBMXDDTRRT-JGVFFNPUSA-N	1	1	1	3	Level 1+					39065116	20180711_JJ_JS_Wildermuth_TimeCrs2_171231_QE119_683775-924_USHXG01081_POS_MSMS-v2_Medicago-4d-2_IR001__046.h5	1.82764	20180711_JJ_JS_Wildermuth_TimeCrs2_171231_QE119_683775-924_USHXG01081_POS_MSMS-v2_Medicago-4d-4_IR001__088.h5	1.83	15	67.055,69.071,81.071,93.071,95.086,99.056,109.102,111.056,136.112,137.096,153.102,154.122,179.118,197.128,215.139	0.8549	[M+H]+	215.139	215.139	0.0002	0.8505	1.76	2.03	1.83	1.88	0.05	0007_d-Dethiobiotin_positive_M+H215p1390_1p83	83508.1	60883.4	60778.7	52607.6	215024	183327	359516	177641	316428	256848	52900.5	472822
49	dihexose(s)	Yes	sucrose			C12H22O11	positive	342.116	CZMRCDWAGMRECN-UGDNZRGBSA-N	1	1	0.5	2.5	Level 1+			RT shifted from predicted, but known to co-elute with other dihexoses		67714192	20180711_JJ_JS_Wildermuth_TimeCrs2_171231_QE119_683775-924_USHXG01081_POS_MSMS-v2_Brachy-p5h-3_IR001__061.h5	13.0798	20180711_JJ_JS_Wildermuth_TimeCrs2_171231_QE119_683775-924_USHXG01081_POS_MSMS-v2_Medicago-p5h-2_IR001__167.h5	12.53	3	185.042,203.053,365.105	0.9393	[M+Na]+	365.105	365.106	0.0002	0.512	12.27	12.58	13.08	12.43	0.65	0049_sucrose_positive_M+Na365p1054_13p08	1.73799e+06	19942140	19517870	2.03577e+06	5650030	4.33851e+06	3.00542e+06	1.27627e+06	3.48186e+06	2.12294e+06	25444400	3.39324e+06
0	ferulic acid	Yes	ferulic acid			C10H10O4	negative	194.058	KSEBMYQBYZTDHS-HWKANZROSA-N	1	1	1	3	Level 1+					2.84029e+06	20180711_JJ_JS_Wildermuth_TimeCrs2_171231_QE119_683775-924_USHXG01081_NEG_MSMS-v2_Medicago-1d-4_IR002__201.h5	1.16953	20180711_JJ_JS_Wildermuth_TimeCrs2_171231_QE119_683775-924_USHXG01081_NEG_MSMS-v2_Medicago-1d-3_IR002__053.h5	1.23	7	121.028,134.036,137.023,139.039,149.060,178.026,193.050	0.8407	[M-H]-	193.051	193.051	0	0.0904	1.15	1.33	1.17	1.24	0.07	0000_ferulic_acid_negative_M-H193p0506_1p17	35937.7	32024.4	15296.8	61625.9	265143	685536	453174	165644	614893	190834	433948	520010
8	glucuronolactone	Yes	glucuronolactone			C6H8O6	positive	176.032	UYUXSRADSPPKRZ-SKNVOMKLSA-N	0	1	1	2	Level 1				not collected	1.44825e+06	20180711_JJ_JS_Wildermuth_TimeCrs2_171231_QE119_683775-924_USHXG01081_POS_MSMS-v2_Arabidopsis-p5h-1_IR001_rerun_363.h5	1.90974						[M+NH4]+	194.066	194.067	0.0015	7.5284	1.9	2.17	1.91	2.04	0.13	0008_D-Glucurono-3_6-lactone_positive_M+NH4194p0659_1p91	482952	565673	180330	623449	19229.4	93075.1	18695.8	55135	144860	126608	61098.2	109504
53	glutamine	Yes	glutamine			C5H10N2O3	positive	146.069	ZDXPYRJPNDTMRX-VKHMYHEASA-N	1	1	1	3	Level 1+					708677504	20180711_JJ_JS_Wildermuth_TimeCrs2_171231_QE119_683775-924_USHXG01081_POS_MSMS-v2_Arabidopsis-4d-2_IR001__097.h5	13.9226	20180711_JJ_JS_Wildermuth_TimeCrs2_171231_QE119_683775-924_USHXG01081_POS_MSMS-v2_Arabidopsis-1d-1_IR001__221.h5	14.03	7	56.050,84.045,85.029,101.072,102.056,130.050,147.077	0.9373	[M+H]+	147.076	147.077	0.0002	1.4227	13.9	14.16	13.92	14	0.08	0053_L-glutamine_positive_M+H147p0764_13p92	75661030	7.01842e+06	126732220	7.52464e+06	476985	103412080	134933420	172849660	346102120	666448680	336707040	305403420
15	glyceraldehyde or lactic acid	Yes	glyceraldehyde	glyceraldehyde//lactic acid	MNQZXJOMYWMBOU-UHFFFAOYSA-N//JVTAAEKCZFNVCJ-REOHCLBHSA-N	C3H6O3	negative	90.0317	MNQZXJOMYWMBOU-UHFFFAOYSA-N	1	1	0.5	2.5	Level 1+			glyceraldehyde and lactic acid isomers unresolvable: coelute; both have good ref matches		45239064	20180711_JJ_JS_Wildermuth_TimeCrs2_171231_QE119_683775-924_USHXG01081_NEG_MSMS-v2_Arabidopsis-4d-4_IR002__391.h5	4.82873	20180711_JJ_JS_Wildermuth_TimeCrs2_171231_QE119_683775-924_USHXG01081_NEG_MSMS-v2_Arabidopsis-1d-2_IR002__270.h5	5.86	3	71.012,87.007,89.023	0.991	[M-H]-	89.0244	89.0228	0.0016	18.032	5.16	6.19	4.83	5.77	0.94	0015_glyceraldehyde_negative_M-H89p0244_4p83	1.84952e+06	996268	17358780	1.8765e+06	443716	2.55325e+06	23177310	19847700	121378180	87724730	3.36843e+06	94270750
27	guanine	Yes	guanine			C5H5N5O	positive	151.049	UYTPUPDQBNUYGX-UHFFFAOYSA-N	1	1	1	3	Level 1+					295899424	20180711_JJ_JS_Wildermuth_TimeCrs2_171231_QE119_683775-924_USHXG01081_POS_MSMS-v2_Medicago-02h-2_IR001_rerun_366.h5	6.02101	20180711_JJ_JS_Wildermuth_TimeCrs2_171231_QE119_683775-924_USHXG01081_POS_MSMS-v2_TxCtrl-4d-6_IR001__248.h5	5.62	9	109.051,110.036,128.046,134.047,135.030,136.015,152.057,153.041,154.025	0.9086	[M+H]+	152.057	152.057	0.0003	1.7755	5.41	5.86	6.02	5.69	0.33	0027_guanine_positive_M+H152p0567_6p02	248509140	655023040	211180560	359618360	535593640	1241375360	1526612640	396220920	1267221280	1055235680	783647760	729855680
44	histamine and unresolvable, unidentified isomers	Yes	histamine			C5H9N3	positive	111.08	NTYJJOPFIAHURM-UHFFFAOYSA-N	1	1	0.5	2.5	Level 1+			multiple unresolvable isomers		26081410	20180711_JJ_JS_Wildermuth_TimeCrs2_171231_QE119_683775-924_USHXG01081_POS_MSMS-v2_Brachy-04h-3_IR001__010.h5	11.8327	20180711_JJ_JS_Wildermuth_TimeCrs2_171231_QE119_683775-924_USHXG01081_POS_MSMS-v2_Brachy-p5h-1_IR001__284.h5	11.05	4	68.051,83.061,95.061,112.088	0.9683	[M+H]+	112.087	112.088	0.0005	4.7925	10.36	11.69	11.83	11.12	0.71	0044_histamine_positive_M+H112p0869_11p83	44085.1	151898	9563.72	95946.4	245167480	69095.1	188006	13087.3	72547.8	187431	15126.7	127299
46	histidinol and unresolvable, unidentified isomers	Yes	histidinol			C6H11N3O	positive	141.09	ZQISRDCJNBUVMM-YFKPBYRVSA-N	1	1	0.5	2.5	Level 1+			multiple unresolvable isomers		2.027e+06	20180711_JJ_JS_Wildermuth_TimeCrs2_171231_QE119_683775-924_USHXG01081_POS_MSMS-v2_Medicago-4d-2_IR001__046.h5	12.5859	20180711_JJ_JS_Wildermuth_TimeCrs2_171231_QE119_683775-924_USHXG01081_POS_MSMS-v2_Brachy-1d-3_IR001_rerun_327.h5	12.03	7	81.045,83.061,95.061,107.061,124.087,125.071,142.098	0.9106	[M+H]+	142.097	142.098	0.0003	2.0001	11.59	12.32	12.59	11.97	0.62	0046_L-histidinol_positive_M+H142p0975_12p59	68168.8	105942	63997.7	62042.5	13540370	68375.3	81440.7	78914.7	105890	100269	78680.1	64304
6	homovanillic acid	Yes	homovanillic acid			C9H10O4	negative	182.058	QRMZSPFSDQBLIX-UHFFFAOYSA-N	0.5	1	1	2.5	Level 1+				Partial match, some lower intensity fragments not matched	1.50905e+06	20180711_JJ_JS_Wildermuth_TimeCrs2_171231_QE119_683775-924_USHXG01081_NEG_MSMS-v2_Medicago-4d-2_IR002__047.h5	1.6515	20180711_JJ_JS_Wildermuth_TimeCrs2_171231_QE119_683775-924_USHXG01081_NEG_MSMS-v2_Medicago-4d-3_IR002__174.h5	1.71	3	122.036,137.023,137.059	0.7768	[M-H]-	181.051	181.05	0.001	5.7603	1.64	1.84	1.65	1.72	0.07	0006_Homovanillic_acid_negative_M-H181p0506_1p65	19689.7	21578.5	11029.3	7157.22	24121	4346.47	4492.63	0	6773.48	8762.93	6243.33	6761.81
16	hypoxanthine	Yes	hypoxanthine			C5H4N4O	positive	136.039	FDGQSTZJBFJUBT-UHFFFAOYSA-N	1	1	1	3	Level 1+					72591048	20180711_JJ_JS_Wildermuth_TimeCrs2_171231_QE119_683775-924_USHXG01081_POS_MSMS-v2_Medicago-04h-1_IR001_rerun_339.h5	2.90645	20180711_JJ_JS_Wildermuth_TimeCrs2_171231_QE119_683775-924_USHXG01081_POS_MSMS-v2_TxCtrl-4d-5_IR001__055.h5	2.62	2	94.041,137.046	0.9894	[M+H]+	137.046	137.046	0.0003	2.068	2.54	3	2.91	2.69	0.21	0016_hypoxanthine_positive_M+H137p0458_2p91	179761580	114144560	60000540	61104150	101950280	280019240	5.48557e+06	221249760	122154620	121626040	91279680	5.58748e+06
24	inosine	Yes	inosine			C10H12N4O5	positive	268.081	UGQMRVRMYYASKQ-KQYNXXCUSA-N	1	1	1	3	Level 1+			RT shift but confirmed by external standard		2405843	20180711_JJ_JS_Wildermuth_TimeCrs2_171231_QE119_683775-924_USHXG01081_POS_MSMS-v2_Brachy-4d-3_IR001_rerun_321.h5	5.2138	20180711_JJ_JS_Wildermuth_TimeCrs2_171231_QE119_683775-924_USHXG01081_POS_MSMS-v2_Brachy-4d-3_IR001_rerun_321.h5	4.77	2	57.034,137.046	0.9661	[M+H]+	269.088	269.089	0.0006	2.1018	4.47	4.93	5.21	4.72	0.5	0024_inosine_positive_M+H269p0881_5p21	48444.1	55480	28609.2	58761.6	297930	423120	120968	361618	586504	291902	325211	236705
39	isoleucine	Yes	isoleucine			C6H13NO2	positive	131.095	AGPKZVBTJJNPAG-WHFBIAKZSA-N	1	1	1	3	Level 1+					44440668	20180711_JJ_JS_Wildermuth_TimeCrs2_171231_QE119_683775-924_USHXG01081_POS_MSMS-v2_Arabidopsis-4d-2_IR001__097.h5	9.41585	20180711_JJ_JS_Wildermuth_TimeCrs2_171231_QE119_683775-924_USHXG01081_POS_MSMS-v2_Brachy-1d-1_IR001__115.h5	9.01	2	69.071,86.097	0.9902	[M+H]+	132.102	132.102	0.0003	2.4338	8.82	9.38	9.42	9.05	0.37	0039_l-isoleucine_positive_M+H132p1019_9p42	569254	864947	392573	461519	605714	26001220	20231300	1.76424e+06	8.01738e+06	7.40226e+06	14627870	37943640
38	leucine/norleucine	Yes	leucine			C6H13NO2	positive	131.095	ROHFNLRQFUQHCH-UHFFFAOYSA-N	1	1	1	3	Level 1+					49056400	20180711_JJ_JS_Wildermuth_TimeCrs2_171231_QE119_683775-924_USHXG01081_POS_MSMS-v2_Arabidopsis-4d-2_IR001__097.h5	9.03288	20180711_JJ_JS_Wildermuth_TimeCrs2_171231_QE119_683775-924_USHXG01081_POS_MSMS-v2_Brachy-4d-3_IR001_rerun_321.h5	8.7	2	86.097,132.102	0.9952	[M+H]+	132.102	132.102	0.0003	2.4235	8.29	8.79	9.03	8.62	0.41	0038_DL-Leucine_positive_M+H132p1019_9p03	717698	1.04354e+06	308206	609158	754522	47540050	3.09718e+06	1.98835e+06	132532530	6.75985e+06	2.13454e+06	5.35333e+06
14	malonic acid	Yes	malonic acid			C3H4O4	negative	104.011	OFOBLEOULBTSOW-UHFFFAOYSA-N	1	1	1	3	Level 1+					1.35564e+06	20180711_JJ_JS_Wildermuth_TimeCrs2_171231_QE119_683775-924_USHXG01081_NEG_MSMS-v2_Arabidopsis-4d-2_IR002__098.h5	4.68816	20180711_JJ_JS_Wildermuth_TimeCrs2_171231_QE119_683775-924_USHXG01081_NEG_MSMS-v2_Arabidopsis-4d-2_IR002__098.h5	4.77	2	59.012,103.002	0.9734	[M-H]-	103.004	103.002	0.0016	15.3795	4.23	5.48	4.69	4.63	0.06	0014_malonic_acid_negative_M-H103p0037_4p69	101034	60521.1	63979.1	65473.3	35026	80944.3	80405.9	104519	171439	171433	79270.9	203545
31	N-acetyl-hexosamine	Yes	N-acetyl-glucosamine	N-acetyl-glucosamine//N-acetyl-mannosamine	OVRNDRQMDRJTHS-RTRLPJTCSA-N//OVRNDRQMDRJTHS-ZTVVOAFPSA-N	C8H15NO6	positive	221.09	OVRNDRQMDRJTHS-RTRLPJTCSA-N	1	1	1	3	Level 1+			multiple unresolvable peaks		25334754	20180711_JJ_JS_Wildermuth_TimeCrs2_171231_QE119_683775-924_USHXG01081_POS_MSMS-v2_Medicago-1d-2_IR001__369.h5	6.74735	20180711_JJ_JS_Wildermuth_TimeCrs2_171231_QE119_683775-924_USHXG01081_POS_MSMS-v2_Brachy-4d-4_IR001__079.h5	6.15	24	60.045,61.029,69.035,70.066,71.050,80.050,81.034,84.045,96.045,97.029,98.061,99.045,108.045,109.029,114.055,116.071,124.040,126.055,127.039,138.055,144.066,168.065,186.076,204.087	0.8908	[M+H-H2O]+	204.087	204.087	0.0004	1.9828	5.87	6.62	6.75	6.26	0.49	0031_N-Acetyl-D-Glucosamine_positive_M+H-H2O204p0866_6p75	571295	577003	365219	535292	3.17246e+06	13930930	959859	274613	2.27893e+06	1.07911e+06	1.03634e+06	18874730
19	N-acetyl-phenylalanine	Yes	N-acetyl-phenylalanine			C11H13NO3	positive	207.09	CBQJSKKFNMDLON-JTQLQIEISA-N	1	1	1	3	Level 1+					6326910	20180711_JJ_JS_Wildermuth_TimeCrs2_171231_QE119_683775-924_USHXG01081_POS_MSMS-v2_Medicago-4d-2_IR001__046.h5	3.69321	20180711_JJ_JS_Wildermuth_TimeCrs2_171231_QE119_683775-924_USHXG01081_POS_MSMS-v2_Medicago-1d-1_IR001__070.h5	3.93	3	120.081,162.091,166.086	0.9196	[M+H]+	208.097	208.097	0.0002	0.9164	3.69	4.5	3.69	4.03	0.33	0019_N-Acetyl-L-phenylalanine_positive_M+H208p0968_3p69	15966.9	19781.1	15560.3	22133.5	12362.6	31972.2	21771.9	9788.78	15832.3	17388.6	13412.7	20932.9
0	nicotinamide	Yes	nicotinamide			C6H6N2O	positive	122.048	DFPAKSUCGFBDDF-UHFFFAOYSA-N	0	1	1	2	Level 1				not collected	3.86172e+06	20180711_JJ_JS_Wildermuth_TimeCrs2_171231_QE119_683775-924_USHXG01081_POS_MSMS-v2_Medicago-p5h-2_IR001__167.h5	1.08574						[M+H]+	123.055	123.056	0.0005	3.7576	1.11	1.23	1.09	1.16	0.07	0000_nicotinamide_positive_M+H123p0553_1p09	792938	686749	449537	718878	680403	3.01084e+06	927345	1.17591e+06	2.47009e+06	933550	1.0924e+06	1.23948e+06
30	pantothenic acid	Yes	pantothenic acid			C9H17NO5	positive	219.111	GHOKWGTUZJEAQD-ZETCQYMHSA-N	1	1	1	3	Level 1+					56926080	20180711_JJ_JS_Wildermuth_TimeCrs2_171231_QE119_683775-924_USHXG01081_POS_MSMS-v2_Medicago-4d-2_IR001__046.h5	6.67544	20180711_JJ_JS_Wildermuth_TimeCrs2_171231_QE119_683775-924_USHXG01081_POS_MSMS-v2_Arabidopsis-1d-1_IR001__221.h5	6.46	25	57.071,59.050,67.055,69.071,70.030,72.045,73.029,85.066,86.097,90.056,95.050,98.024,100.040,103.076,113.060,116.035,124.076,142.087,156.102,160.097,166.087,174.113,184.097,202.108,220.118	0.9148	[M+H]+	220.118	220.119	0.0005	2.4524	6.18	6.78	6.68	6.55	0.13	0030_pantothenic_acid_positive_M+H220p1180_6p68	3.46525e+06	3.44843e+06	339940	3.03867e+06	1.42786e+06	3.47124e+06	22370150	161596	32276140	307080	1.53421e+06	2.00508e+06
36	phenylalanine	Yes	phenylalanine			C9H11NO2	positive	165.079	COLNVLDHVKWLRT-QMMMGPOBSA-N	1	1	1	3	Level 1+					54991504	20180711_JJ_JS_Wildermuth_TimeCrs2_171231_QE119_683775-924_USHXG01081_POS_MSMS-v2_Medicago-02h-1_IR001__387.h5	8.67248	20180711_JJ_JS_Wildermuth_TimeCrs2_171231_QE119_683775-924_USHXG01081_POS_MSMS-v2_Medicago-04h-1_IR001__272.h5	8.36	9	79.055,93.071,103.055,107.050,120.081,131.049,148.079,149.060,166.087	0.9182	[M+H]+	166.086	166.087	0.0002	1.4821	8.17	8.7	8.67	8.41	0.26	0036_L-phenylalanine_positive_M+H166p0863_8p67	317594	376851	108556	218213	333050	1.31688e+06	910930	313296	3.66743e+06	1.67671e+06	493128	1.11953e+06
41	pipecolic acid	Yes	pipecolic acid			C6H11NO2	positive	129.079	HXEACLLIILLPRG-YFKPBYRVSA-N	1	1	1	3	Level 1+					23431932	20180711_JJ_JS_Wildermuth_TimeCrs2_171231_QE119_683775-924_USHXG01081_POS_MSMS-v2_Medicago-p5h-2_IR001__167.h5	10.6441	20180711_JJ_JS_Wildermuth_TimeCrs2_171231_QE119_683775-924_USHXG01081_POS_MSMS-v2_Medicago-p5h-2_IR001__167.h5	10.28	3	56.050,84.082,130.087	0.9512	[M+H]+	130.086	130.087	0.0003	2.5757	10.09	10.56	10.64	10.34	0.3	0041_l-Pipecolic_acid_positive_M+H130p0863_10p64	5859.63	0	0	0	5706	7359	4588.18	33128.2	41375	14916.4	29218.8	6404.34
40	proline and unresolvable, unidentified isomers	Yes	proline			C5H9NO2	positive	115.063	ONIBWKKTOPOVIA-BYPYZUCNSA-N	1	1	0.5	2.5	Level 1+			multiple unresolvable isomers		92689112	20180711_JJ_JS_Wildermuth_TimeCrs2_171231_QE119_683775-924_USHXG01081_POS_MSMS-v2_Medicago-1d-2_IR001__369.h5	10.596	20180711_JJ_JS_Wildermuth_TimeCrs2_171231_QE119_683775-924_USHXG01081_POS_MSMS-v2_Medicago-p5h-2_IR001__167.h5	9.93	2	70.066,116.071	0.9951	[M+H]+	116.071	116.071	0.0005	4.157	9.87	10.28	10.6	10.07	0.53	0040_L-proline_positive_M+H116p0706_10p60	64090.3	56559.8	45864.5	125748	48268.6	540648	495038	309983	1.16664e+06	850639	342790	614862
9	pyridoxine	Yes	pyridoxine	3-hydroxyphenylacetic acid//pyridoxine	FVMDYYGIDFPZAX-UHFFFAOYSA-N//LXNHXLLTXMVWPM-UHFFFAOYSA-N	C8H11NO3	positive	169.074	LXNHXLLTXMVWPM-UHFFFAOYSA-N	1	1	1	3	Level 1+					280102016	20180711_JJ_JS_Wildermuth_TimeCrs2_171231_QE119_683775-924_USHXG01081_POS_MSMS-v2_Medicago-4d-2_IR001__046.h5	1.99624	20180711_JJ_JS_Wildermuth_TimeCrs2_171231_QE119_683775-924_USHXG01081_POS_MSMS-v2_Medicago-4d-1_IR001__016.h5	1.91	4	124.076,134.060,152.071,170.081	0.9445	[M+H]+	170.081	170.082	0.0003	1.7039	1.56	2.32	2	1.91	0.08	0009_pyridoxine_positive_M+H170p0812_2p00	54968440	5.02593e+06	4.52783e+06	5.08499e+06	2.38158e+06	54903290	44200910	54138330	92857630	112575200	3.93309e+06	73377540
21	sarcosine	Yes	sarcosine			C3H7NO2	negative	89.0477	FSYKKLYZXJSNPZ-UHFFFAOYSA-N	1	1	1	3	Level 1+					25388908	20180711_JJ_JS_Wildermuth_TimeCrs2_171231_QE119_683775-924_USHXG01081_NEG_MSMS-v2_Arabidopsis-4d-2_IR002__098.h5	12.4506	20180711_JJ_JS_Wildermuth_TimeCrs2_171231_QE119_683775-924_USHXG01081_NEG_MSMS-v2_Arabidopsis-4d-1_IR002__192.h5	12.66	1	88.039	0	[M-H]-	88.0404	88.0388	0.0016	18.1309	12.48	12.73	12.45	12.63	0.18	0021_sarcosine_negative_M-H88p0404_12p45	221725	328151	97464.6	194376	21205.9	3.43206e+06	2.11028e+06	276589	5.67341e+06	2.63232e+06	1.48915e+06	33617600
50	threonine	Yes	threonine			C4H9NO3	positive	119.058	AYFVYJQAPQTCCC-GBXIJSLDSA-N	1	1	1	3	Level 1+					43613256	20180711_JJ_JS_Wildermuth_TimeCrs2_171231_QE119_683775-924_USHXG01081_POS_MSMS-v2_Arabidopsis-4d-2_IR001__097.h5	13.1151	20180711_JJ_JS_Wildermuth_TimeCrs2_171231_QE119_683775-924_USHXG01081_POS_MSMS-v2_Arabidopsis-04h-1_IR001__037.h5	12.59	6	56.050,57.034,74.061,84.045,102.055,120.066	0.9212	[M+H]+	120.066	120.066	0.0004	3.675	12.54	12.85	13.12	12.73	0.39	0050_L-threonine_positive_M+H120p0655_13p12	1.05671e+06	1.08271e+06	292291	778208	214359	2.47816e+06	1.92348e+06	642421	5.29351e+06	3.31332e+06	1.62848e+06	3.2499e+06
3	thymidine	Yes	thymidine			C10H14N2O5	positive	242.09	IQFYYKKMVGJFEH-XLPZGREQSA-N	1	1	1	3	Level 1+					5487919	20180711_JJ_JS_Wildermuth_TimeCrs2_171231_QE119_683775-924_USHXG01081_POS_MSMS-v2_Medicago-1d-2_IR001__369.h5	1.43172	20180711_JJ_JS_Wildermuth_TimeCrs2_171231_QE119_683775-924_USHXG01081_POS_MSMS-v2_Medicago-02h-2_IR001_rerun_366.h5	1.44	8	69.034,71.050,73.029,81.034,99.044,110.024,117.055,127.050	0.7804	[M+H]+	243.098	243.098	0.0003	1.3048	1.38	1.55	1.43	1.46	0.03	0003_thymidine_positive_M+H243p0976_1p43	109576	78107.3	116434	148409	192745	155223	213493	172070	451669	528154	82450.2	415224
35	trigonelline and unresolvable, unidentified isomers	Yes	trigonelline			C7H8NO2+	positive	138.055	WWNNZCOKKKDOPX-UHFFFAOYSA-O	1	1	1	3	Level 1+			multiple unresolvable peaks		460133088	20180711_JJ_JS_Wildermuth_TimeCrs2_171231_QE119_683775-924_USHXG01081_POS_MSMS-v2_Medicago-4d-2_IR001__046.h5	8.49165	20180711_JJ_JS_Wildermuth_TimeCrs2_171231_QE119_683775-924_USHXG01081_POS_MSMS-v2_Brachy-00h-4_IR001__233.h5	8.26	2	94.066,138.055	0.9832	[M]+	138.055	138.055	0.0003	1.8299	7.97	8.64	8.49	8.2	0.3	0035_3-carboxy-1-methylpyridinium_positive_M138p0550_8p49	36432	197071	15457.7	115160	57128.1	35297.5	27921.8	16862.3	227230	46540.8	25551.8	39953.2
43	tyrosine	Yes	tyrosine			C9H11NO3	positive	181.074	OUYCCCASQSFEME-QMMMGPOBSA-N	1	1	1	3	Level 1+					30189604	20180711_JJ_JS_Wildermuth_TimeCrs2_171231_QE119_683775-924_USHXG01081_POS_MSMS-v2_Arabidopsis-4d-2_IR001__097.h5	11.4917	20180711_JJ_JS_Wildermuth_TimeCrs2_171231_QE119_683775-924_USHXG01081_POS_MSMS-v2_Arabidopsis-4d-4_IR001__390.h5	11.09	8	91.055,95.050,119.049,123.044,136.076,147.044,165.055,182.081	0.9017	[M+H]+	182.081	182.082	0.0003	1.6752	10.81	11.28	11.49	11.02	0.47	0043_L-tyrosine_positive_M+H182p0812_11p49	175880	264109	182421	143980	207431	1.15999e+06	911696	431623	3.02796e+06	1.5249e+06	778504	1.43104e+06
7	unidentified isomer of 3-hydroxyanthranilic acid	Yes	3-hydroxyanthranilic acid			C7H7NO3	negative	153.043	WJXSWCUQABXPFS-UHFFFAOYSA-N	1	1	0.5	2.5	Level 1+			RT shifted from predicted, either isomer or in source fragment of larger molecule with different RT		5.69924e+06	20180711_JJ_JS_Wildermuth_TimeCrs2_171231_QE119_683775-924_USHXG01081_NEG_MSMS-v2_Medicago-4d-1_IR002__017.h5	1.7177	20180711_JJ_JS_Wildermuth_TimeCrs2_171231_QE119_683775-924_USHXG01081_NEG_MSMS-v2_Brachy-02h-4_IR002__267.h5	1.19	2	108.044,152.034	0.9696	[M-H]-	152.035	152.035	0.0008	5.128	1.14	1.27	1.72	1.19	0.53	0007_2-Amino-3-hydroxybenzoic_acid_negative_M-H152p0353_1p72	368880	474550	2178080	665312	339000	42484.3	75240.7	56021.6	42041.4	79610.2	30177.4	58557.7
32	unidentified isomer of cytidine	Yes	cytidine			C9H13N3O5	positive	243.086	UHDGCWIWMRVCDJ-XVFCMESISA-N	1	1	0.5	2.5	Level 1+			RT shifted and different from external standard, either isomer or in source fragment of larger molecule		123590456	20180711_JJ_JS_Wildermuth_TimeCrs2_171231_QE119_683775-924_USHXG01081_POS_MSMS-v2_Arabidopsis-1d-2_IR001_rerun_336.h5	6.69688	20180711_JJ_JS_Wildermuth_TimeCrs2_171231_QE119_683775-924_USHXG01081_POS_MSMS-v2_Brachy-4d-3_IR001__254.h5	6.17	2	95.025,112.051	0.9971	[M+H]+	244.093	244.093	0.0003	1.1948	5.99	6.58	6.7	6.19	0.51	0032_cytidine_positive_M+H244p0928_6p70	137888700	148094390	81938750	132576650	117194070	128534180	110653190	7.77453e+06	290433220	333498340	105520600	212093740
17	unidentified isomer of nicotine	Yes	nicotine			C10H14N2	positive	162.116	SNICXCGAKADSCV-JTQLQIEISA-N	1	1	0.5	2.5	Level 1+			RT is shifted, either isomer or either produced as in source fragment of larger molecule		68621128	20180711_JJ_JS_Wildermuth_TimeCrs2_171231_QE119_683775-924_USHXG01081_POS_MSMS-v2_Brachy-04h-1_IR001__393.h5	3.19118	20180711_JJ_JS_Wildermuth_TimeCrs2_171231_QE119_683775-924_USHXG01081_POS_MSMS-v2_TxCtrl-02h-1_IR001__152.h5	2.47	10	80.050,84.082,94.066,106.066,117.058,120.081,130.055,130.065,132.081,163.123	0.9287	[M+H]+	163.123	163.123	0.0002	1.4319	2.41	2.85	3.19	2.62	0.57	0017_nicotine_positive_M+H163p1230_3p19	126676360	5.91965e+06	137855700	70009490	134925490	182502480	136809300	221841060	1.09153e+06	838525	470076	1.85487e+06
26	unidentified isomer of nicotinic acid	Yes	nicotinic acid			C6H5NO2	positive	123.032	PVNIIMVLHYAWGP-UHFFFAOYSA-N	1	1	0.5	2.5	Level 1+			RT is shifted, either isomer or either produced as in source fragment of larger molecule		98046840	20180711_JJ_JS_Wildermuth_TimeCrs2_171231_QE119_683775-924_USHXG01081_POS_MSMS-v2_Arabidopsis-4d-2_IR001__097.h5	5.4651	20180711_JJ_JS_Wildermuth_TimeCrs2_171231_QE119_683775-924_USHXG01081_POS_MSMS-v2_Arabidopsis-00h-1_IR001__103.h5	6.29	3	80.050,96.045,124.039	0.9625	[M+H]+	124.039	124.04	0.0006	4.9441	5.87	6.42	5.47	6.2	0.74	0026_nicotinic_acid_positive_M+H124p0393_5p47	3.45511e+06	2.66481e+06	541445	35849810	258744	3.13874e+06	2.64648e+06	196660	4.60205e+06	293681	28330010	43293090
42	unidentified isomer of valine	Yes	valine			C5H11NO2	positive	117.079	KZSNJWFQEVHDMF-BYPYZUCNSA-N	1	1	0.5	2.5	Level 1+			RT shifted from predicted but matches RT of labeled internal standard		11654250	20180711_JJ_JS_Wildermuth_TimeCrs2_171231_QE119_683775-924_USHXG01081_POS_MSMS-v2_Arabidopsis-4d-2_IR001__097.h5	10.7379	20180711_JJ_JS_Wildermuth_TimeCrs2_171231_QE119_683775-924_USHXG01081_POS_MSMS-v2_Arabidopsis-4d-1_IR001__191.h5	10.12	5	55.055,57.058,59.050,72.082,118.087	0.7548	[M+H]+	118.086	118.087	0.0004	3.5661	10.02	10.46	10.74	10.2	0.53	0042_L-valine_positive_M+H118p0863_10p74	196539	195233	119142	153043	210244	493899	558397	294566	12125970	10072470	376506	639171
1	uracil	Yes	uracil			C4H4N2O2	negative	112.027	ISAKRJDGNUQOIC-UHFFFAOYSA-N	1	1	1	3	Level 1+					7.36902e+06	20180711_JJ_JS_Wildermuth_TimeCrs2_171231_QE119_683775-924_USHXG01081_NEG_MSMS-v2_TxCtrl-02h-3_IR002_rerun_319.h5	1.25181	20180711_JJ_JS_Wildermuth_TimeCrs2_171231_QE119_683775-924_USHXG01081_NEG_MSMS-v2_Arabidopsis-04h-2_IR002__279.h5	1.28	2	110.974,111.018	0.9282	[M-H]-	111.02	111.018	0.0016	14.167	1.12	1.39	1.25	1.28	0.03	0001_uracil_negative_M-H111p0200_1p25	900163	801503	441116	8958280	260820	7.32436e+06	61486860	24979790	5.36558e+06	40081800	1.02335e+06	49849020
3	vanillic acid	Yes	vanillic acid			C8H8O4	negative	168.042	WKOLLVMJNQIZCI-UHFFFAOYSA-N	1	1	1	3	Level 1+					106001488	20180711_JJ_JS_Wildermuth_TimeCrs2_171231_QE119_683775-924_USHXG01081_NEG_MSMS-v2_Medicago-4d-2_IR002__047.h5	1.41248	20180711_JJ_JS_Wildermuth_TimeCrs2_171231_QE119_683775-924_USHXG01081_NEG_MSMS-v2_Medicago-04h-4_IR002__014.h5	1.13	5	108.020,109.028,123.044,152.010,167.034	0.7274	[M-H]-	167.035	167.034	0.0012	6.9414	1.08	1.27	1.41	1.15	0.26	0003_Vanillic_acid_negative_M-H167p0350_1p41	100298	89515.6	45617.1	153261	201430	64350.9	68342.3	53546.8	96854.1	97432.6	72915.9	69431.5
12	xanthine	Yes	xanthine			C5H4N4O2	negative	152.033	LRFVTYWOQMYALW-UHFFFAOYSA-N	1	1	1	3	Level 1+					18642728	20180711_JJ_JS_Wildermuth_TimeCrs2_171231_QE119_683775-924_USHXG01081_NEG_MSMS-v2_Medicago-04h-1_IR002_rerun_340.h5	2.55801	20180711_JJ_JS_Wildermuth_TimeCrs2_171231_QE119_683775-924_USHXG01081_NEG_MSMS-v2_Medicago-02h-3_IR002__125.h5	2.49	2	108.019,151.025	0.9895	[M-H]-	151.026	151.025	0.0013	8.9257	2.28	2.63	2.56	2.41	0.14	0012_xanthine_negative_M-H151p0261_2p56	667878	682625	582470	550541	1.84925e+06	6.98554e+06	1.36045e+06	65226970	54792810	3.27858e+06	38488700	1.71709e+06
	red: excluded due to low signal in samples compared to blanks
[truncated: 88 more columns]

## Sheet: Environments
COMPOUND ANNOTATION										COMPOUND IDENTIFICATION SCORES									MS1 INTENSITY INFORMATION			MSMS INFORMATION				MSMS EVALUATION	ION INFORMATION			M/Z EVALUATION		CHROMATOGRAPHIC PEAK INFORMATION				RT EVALUATION	group	MeOH	MeOH	MeOH	MS-nonster-Brachy	MS-nonster-Brachy	MS-nonster-Brachy	MS-nonster-Brachy	MS-nonster-Brachy	MS-nonster-TxCtrl	MS-nonster-TxCtrl	MS-ster-Brachy	MS-ster-Brachy
Compound #	Identified Metabolite	Use for peak height	Name of metabolite searched for	Labels of Overlapping Compounds	Inchi Keys of Overlapping Compounds	Molecular Formula	Polarity	Exact Mass	Inchi Key	MSMS Score (0 to 1)	m/z score (0 to 1)	RT score (0 to 1)	Total ID Score (0 to 3)	Mass Spec Inititative Identification Level	Isomer details	Identification notes	MS1 notes	MS2 notes	Maximum MS1 intensity across all files	Filename w/ maximum MS1	Retention time of max intensity MS1 peak	File with highest MSMS match score	RT of highest matched MSMS scan	Number of ion matches in msms spectra to EMA reference spectra	List of ion matches in msms spectra to EMA reference spectra		Adduct	Theoretical m/z	Measured m/z	mass error (delta Da)	mass error (delta ppm)	Minimum retention time (min)	Maximum retention time (max)	Theoretical retention time (peak)	Detected RT (peak)	RT error (absolute delta)	sample	InjBl-MeOH	InjBl-MeOH	InjBl-MeOH	MS-nonster-Brachy-1-426	MS-nonster-Brachy-2-427	MS-nonster-Brachy-3-428	MS-nonster-Brachy-4-429	MS-nonster-Brachy-5-430	MS-nonster-TxCtrl-1-431	MS-nonster-TxCtrl-2-432	MS-ster-Brachy-1-412	MS-ster-Brachy-2-413
Unique for study	Some isomers are not chromatographically or spectrally resolvable.		Name of standard reference compound in library match.	compound with similar mz (abs difference <= 0.005) or monoisotopic molecular weight (abs difference <= 0.005) and RT (min or max within the RT-min-max-range of similar compound)	List of inchi keys that correspond to the compounds listed in the previous column			monoisotopic mass (neutral except for permanently charged molecules)	neutralized version	1 (MSMS matches ref. std.), 0.5 (possible match), 0 (no MSMS collected or no appropriate ref available), -1 (bad match)	POS MODE: 1 (delta ppm </= 5 or delta Da </= 0.001), 0.5 (delta ppm 5-10 and delta Da > 0.001), 0 (delta ppm > 10) NEG MODE: 1 (delta ppm </= 15 or delta Da </= 0.005), 0.5 (delta ppm 15-20 and delta Da > 0.001), 0 (delta ppm > 20) (NOTE: neg mass accuracy is not as good as pos) mz_quality	1 (delta RT </= 0.5), 0.5 (delta RT > 0.5 & </= 2), 0 (delta RT > 2 min)	sum of m/z, RT and MSMS score	Level 1 = Two independent and orthogonal properties match authentic standard; else = putative [Metabolomics. 2007 Sep; 3(3): 211-221. doi: 10.1007/s11306-007-0082-2]	Isomers have same formula (and m/z) and similar RT - MSMS spectra may be used to differentiate (exceptions) or RT elution order									mean # of fragment ions matching between compound in sample and reference compound / standard; may include parent and isotope ions and very low intensity background ions (these do not contribute to score)		MSMS score (highest across all samples), scale of 0 to 1 based on an algorithm. 0 = no match, 1 = perfect match. If no score, then no MSMS was acquired for that compound (@ m/z & RT window).	More than one may be detectable; the one evaluated is listed	theoretical m/z for a given compound / adduct pair	average m/z within 20ppm of theoretical detected across all samples @ RT peak	absolute difference between theoretical and detected m/z	ppm difference between theoretical and detected m/z	Retention range including start and end of detection of an m/z value (Note: Peak Height is calculated as the highest intensity of an m/z within the min/max RT range. Peak Area is calculated as the integrated area under the curve for an m/z within the mix/max RT range.)		theoretical retention time for a compound based upon reference standard at highest intensity point of peak	average retention time for a detected compound at highest intensity point of peak across all samples	absolute difference between theoretical and detected RT peak	pos file	20180925_AK-JS_Wildermuth_Environments3_Brachy_QE139_Ag683775-924-USHXG01163_FPS_MS1_InjBl-MeOH_IR05_009.h5	20180925_AK-JS_Wildermuth_Environments3_Brachy_QE139_Ag683775-924-USHXG01163_FPS_MS1_InjBl-MeOH_IR17_042.h5	20180925_AK-JS_Wildermuth_Environments3_Brachy_QE139_Ag683775-924-USHXG01163_FPS_MS1_InjBl-MeOH_IR30_079.h5	20180925_AK-JS_Wildermuth_Environments3_Brachy_QE139_Ag683775-924-USHXG01163_POS_MSMS_MS-nonster-Brachy-1-426_IR01_028.h5	20180925_AK-JS_Wildermuth_Environments3_Brachy_QE139_Ag683775-924-USHXG01163_POS_MSMS_MS-nonster-Brachy-2-427_IR01_010.h5	20180925_AK-JS_Wildermuth_Environments3_Brachy_QE139_Ag683775-924-USHXG01163_POS_MSMS_MS-nonster-Brachy-3-428_IR01_025.h5	20180925_AK-JS_Wildermuth_Environments3_Brachy_QE139_Ag683775-924-USHXG01163_POS_MSMS_MS-nonster-Brachy-4-429_IR01_037.h5	20180925_AK-JS_Wildermuth_Environments3_Brachy_QE139_Ag683775-924-USHXG01163_POS_MSMS_MS-nonster-Brachy-5-430_IR01_019.h5	20180925_AK-JS_Wildermuth_Environments3_Brachy_QE139_Ag683775-924-USHXG01163_POS_MSMS_MS-nonster-TxCtrl-1-431_IR01_034.h5	20180925_AK-JS_Wildermuth_Environments3_Brachy_QE139_Ag683775-924-USHXG01163_POS_MSMS_MS-nonster-TxCtrl-2-432_IR01_055.h5	20180925_AK-JS_Wildermuth_Environments3_Brachy_QE139_Ag683775-924-USHXG01163_POS_MSMS_MS-ster-Brachy-1-412_IR01_022.h5	20180925_AK-JS_Wildermuth_Environments3_Brachy_QE139_Ag683775-924-USHXG01163_POS_MSMS_MS-ster-Brachy-2-413_IR01_052.h5
index	identified_metabolite		label	overlapping_compound	overlapping_inchi_keys	formula	polarity	exact_mass	inchi_key	msms_quality	mz_quality	rt_quality	total_score	msi_level	isomer_details	identification_notes	ms1_notes	ms2_notes	max_intensity	max_intensity_file	ms1_rt_peak	msms_file	msms_rt	msms_numberofions	msms_matchingions	msms_score	mz_adduct	mz_theoretical	mz_measured	mz_error	mz_ppmerror	rt_min	rt_max	rt_theoretical	rt_measured	rt_error	neg file	20180925_AK-JS_Wildermuth_Environments3_Brachy_QE139_Ag683775-924-USHXG01163_FPS_MS1_InjBl-MeOH_IR05_009.h5	20180925_AK-JS_Wildermuth_Environments3_Brachy_QE139_Ag683775-924-USHXG01163_FPS_MS1_InjBl-MeOH_IR17_042.h5	20180925_AK-JS_Wildermuth_Environments3_Brachy_QE139_Ag683775-924-USHXG01163_FPS_MS1_InjBl-MeOH_IR30_079.h5	20180925_AK-JS_Wildermuth_Environments3_Brachy_QE139_Ag683775-924-USHXG01163_NEG_MSMS_MS-nonster-Brachy-1-426_IR02_029.h5	20180925_AK-JS_Wildermuth_Environments3_Brachy_QE139_Ag683775-924-USHXG01163_NEG_MSMS_MS-nonster-Brachy-2-427_IR02_011.h5	20180925_AK-JS_Wildermuth_Environments3_Brachy_QE139_Ag683775-924-USHXG01163_NEG_MSMS_MS-nonster-Brachy-3-428_IR02_026.h5	20180925_AK-JS_Wildermuth_Environments3_Brachy_QE139_Ag683775-924-USHXG01163_NEG_MSMS_MS-nonster-Brachy-4-429_IR02_038.h5	20180925_AK-JS_Wildermuth_Environments3_Brachy_QE139_Ag683775-924-USHXG01163_NEG_MSMS_MS-nonster-Brachy-5-430_IR02_020.h5	20180925_AK-JS_Wildermuth_Environments3_Brachy_QE139_Ag683775-924-USHXG01163_NEG_MSMS_MS-nonster-TxCtrl-1-431_IR02_035.h5	20180925_AK-JS_Wildermuth_Environments3_Brachy_QE139_Ag683775-924-USHXG01163_NEG_MSMS_MS-nonster-TxCtrl-2-432_IR02_056.h5	20180925_AK-JS_Wildermuth_Environments3_Brachy_QE139_Ag683775-924-USHXG01163_NEG_MSMS_MS-ster-Brachy-1-412_IR02_023.h5	20180925_AK-JS_Wildermuth_Environments3_Brachy_QE139_Ag683775-924-USHXG01163_NEG_MSMS_MS-ster-Brachy-2-413_IR02_053.h5
49	1-methyl-6,7-dihydroxy-1,2,3,4-tetrahydroisoquinoline	Yes	1-methyl-6,7-dihydroxy-1,2,3,4-tetrahydroisoquinoline			C10H13NO2	positive	179.095	IBRKLUSXDYATLG-LURJTMIESA-N	0.5	1	1	2.5	Level 1+				partial match of fragments	650727	20180925_AK-JS_Wildermuth_Environments3_Brachy_QE139_Ag683775-924-USHXG01163_POS_MSMS_MS-ster-Brachy-3-414_IR01_067.h5	7.54639	20180925_AK-JS_Wildermuth_Environments3_Brachy_QE139_Ag683775-924-USHXG01163_POS_MSMS_MS-ster-Brachy-3-414_IR01_067.h5	7.04	5	117.070,137.060,145.065,163.075,180.103	0.7237	[M+H]+	180.102	180.101	0.0006	3.4656	6.8	7.63	7.55	7.27	0.28	0049_Salsolinol_positive_M+H180p1019_7p55	8499.87			110090	155891	164763	460100	190187	16354.8	17238.9	21025.6	36680.2
12	2- or 4-hydroxybenzoic acid	Yes	4-hydroxybenzoic acid	4-hydroxybenzoic acid//salicylic acid	FJKROLUGYXJWQN-UHFFFAOYSA-N//YGSDEFSMJLZEOE-UHFFFAOYSA-N	C7H6O3	negative	138.032	FJKROLUGYXJWQN-UHFFFAOYSA-N	1	1	1	3	Level 1+				co-isolated precursor but all reference ions are in sample spectrum	22547918	20180925_AK-JS_Wildermuth_Environments3_Brachy_QE139_Ag683775-924-USHXG01163_NEG_MSMS_MSSuc-ster-Brachy-5-423_IR02_059.h5	1.62621	20180925_AK-JS_Wildermuth_Environments3_Brachy_QE139_Ag683775-924-USHXG01163_NEG_MSMS_MS-nonster-Brachy-2-427_IR02_011.h5	1.71	3	65.039,93.035,137.025	0.8135	[M-H]-	137.024	137.024	0.0001	0.4228	1.59	1.97	1.63	1.74	0.11	0073_L-Allothreonine_negative_M-H118p0509_13p15	103200	39278.6	33918.5	8767351	1.29209e+06	4290731	3.4753e+06	1.62991e+06	16606.2	58328.4	213943	179194
71	2-amino-2-methylpropanoic acid	Yes	2-amino-2-methylpropanoic acid			C4H9NO2	positive	103.063	FUOOLUPWFVMBKG-UHFFFAOYSA-N	0	1	1	2	Level 1				no ref match available or no MSMS collected	282060	20180925_AK-JS_Wildermuth_Environments3_Brachy_QE139_Ag683775-924-USHXG01163_POS_MSMS_MS-nonster-Brachy-1-426_IR01_028.h5	11.8617						[M+H]+	104.071	104.071	0.0003	2.6858	11.46	11.84	11.86	11.67	0.19	0071_2-Aminoisobutyric_acid_positive_M+H104p0706_11p86	11104.1	9858.53	8706.98	282060	39338.5	63362.3	91177.4	37967.2	33986.7	64486.4	12009	11894.3
31	2-deoxy-glucose	Yes	2-deoxy-glucose			C6H12O5	negative	164.068	PMMURAAUARKVCB-CERMHHMHSA-N	0	1	1	2	Level 1				no ref match available or no MSMS collected	168050	20180925_AK-JS_Wildermuth_Environments3_Brachy_QE139_Ag683775-924-USHXG01163_NEG_MSMS_MS-nonster-Brachy-3-428_IR02_026.h5	3.37447						[M-H]-	163.061	163.061	0.0001	0.3294	3.25	3.68	3.37	3.39	0.02	0024_3-Hydroxybenzoic_acid_negative_M-H137p0244_2p68	107468	27557.3	31556.4	219087	217859	216615	227514	215926	1.48496e+06	1.74154e+06	1.47046e+06	112324
6	2-hydroxypyridine and/or isomers	Yes	2-hydroxypyridine			C5H5NO	positive	95.0371	UBQKCCHYAOITMY-UHFFFAOYSA-N	0.5	1	1	2.5	Level 1+			multiple, unresolvable peaks	partial match of fragments	5.23199e+06	20180925_AK-JS_Wildermuth_Environments3_Brachy_QE139_Ag683775-924-USHXG01163_POS_MSMS_MSSuc-ster-Brachy-1-419_IR01_061.h5	1.28368	20180925_AK-JS_Wildermuth_Environments3_Brachy_QE139_Ag683775-924-USHXG01163_POS_MSMS_MSSuc-ster-Brachy-4-422_IR01_046.h5	1.21	3	61.166,78.034,96.045	0.6046	[M+H]+	96.0444	96.0447	0.0003	3.1263	1.15	1.47	1.28	1.2	0.09	0006_2-HYDROXYPYRIDINE_positive_M+H96p0444_1p28	56006.9	54694.5	66006.3	818588	556969	927348	904743	749693	2.46742e+06	1.44119e+06	1104959	1.67197e+06
18	2-methylmaleic acid	Yes	2-methylmaleic acid			C5H6O4	negative	130.027	HNEGQIOMVPPMNR-IHWYPQMZSA-N	0.5	1	1	2.5	Level 1+				partial match of fragments	1.83975e+06	20180925_AK-JS_Wildermuth_Environments3_Brachy_QE139_Ag683775-924-USHXG01163_NEG_MSMS_MSSuc-ster-Brachy-2-420_IR02_032.h5	2.03565	20180925_AK-JS_Wildermuth_Environments3_Brachy_QE139_Ag683775-924-USHXG01163_NEG_MSMS_MSSuc-ster-Brachy-3-421_IR02_065.h5	1.89	2	85.029,129.019	0.222	[M-H]-	129.019	129.019	0.0001	0.7785	1.8	2.07	2.04	1.88	0.16	0014_azelaic_acid_negative_M-H187p0976_1p96	69317.9	16480.6	18765.8	2384538	3.55009e+06	2720348	4626006	5.94707e+06	2.67962e+06	3.28605e+06	1093875	940469
12	2'-deoxyadenosine	Yes	2'-deoxyadenosine			C10H13N5O3	positive	251.102	OLXZPDWKRNYJJZ-RRKCRQDMSA-N	1	1	1	3	Level 1+				perfect match to internal reference library	5.96526e+06	20180925_AK-JS_Wildermuth_Environments3_Brachy_QE139_Ag683775-924-USHXG01163_POS_MSMS_MSSuc-ster-Brachy-5-423_IR01_058.h5	2.0449						[M+H]+	252.109	252.108	0.0009	3.416	1.88	2.14	2.04	2	0.05	0012_2deoxyadenosine_positive_M+H252p1091_2p04	22207.7	10139.5	11191.6	85177	17705.5	28400.8	44781.6	28484.2			95449	40763.5
37	2'-deoxyguanosine	Yes	2'-deoxyguanosine			C10H13N5O4	positive	267.097	YKBGVTZYEHREMT-KVQBGUIXSA-N	1	1	1	3	Level 1+				perfect match to internal reference library	2566260	20180925_AK-JS_Wildermuth_Environments3_Brachy_QE139_Ag683775-924-USHXG01163_POS_MSMS_MSSuc-ster-Brachy-5-423_IR01_058.h5	6.27584	20180925_AK-JS_Wildermuth_Environments3_Brachy_QE139_Ag683775-924-USHXG01163_POS_MSMS_MSSuc-ster-Brachy-5-423_IR01_058.h5	6.55	3	99.045,117.055,152.057	0.9065	[M+H]+	268.104	268.103	0.0009	3.4692	6.32	6.77	6.28	6.47	0.2	0037_2deoxyguanosine_positive_M+H268p1041_6p28				6065.56	13945.1	23378.1	28743.7	11441	5132.48	9489.59	17242.3	9948.49
56	2',3'-cyclic AMP	Yes	2',3'-cyclic AMP			C10H12N5O6P	negative	329.053	KMYWVDDIPVNLME-KQYNXXCUSA-N	0	1	1	2	Level 1				no ref match available or no MSMS collected	1.51621e+06	20180925_AK-JS_Wildermuth_Environments3_Brachy_QE139_Ag683775-924-USHXG01163_NEG_MSMS_MSSuc-ster-Brachy-2-420_IR02_032.h5	10.036						[M-H]-	328.045	328.046	0.0004	1.261	10.08	10.79	10.04	10.27	0.24	0037_cytidine_negative_M-H242p0782_6p32				2.40193e+06	417700	754146	612831	984429			303784	335536
25	3-amino-4-hydroxybenzoic acid	Yes	3-amino-4-hydroxybenzoic acid			C7H7NO3	negative	153.043	MRBKRZAPGUCWOS-UHFFFAOYSA-N	0	1	1	2	Level 1				no ref match available or no MSMS collected	314867	20180925_AK-JS_Wildermuth_Environments3_Brachy_QE139_Ag683775-924-USHXG01163_NEG_MSMS_MS-nonster-Brachy-1-426_IR02_029.h5	2.78407						[M-H]-	152.035	152.035	0	0.272	2.5	2.89	2.78	2.73	0.05	0019_adenine_negative_M-H134p0472_2p29	43655.7			38371136	6.88747e+06	3.72168e+06	8605384	17519374	186712	474720	26136134	20700226
24	3-hydroxybenzoic acid	Yes	3-hydroxybenzoic acid			C7H6O3	negative	138.032	IJFXRHURBJZNAO-UHFFFAOYSA-N	1	1	1	3	Level 1+				perfect match to internal reference library	4.20242e+06	20180925_AK-JS_Wildermuth_Environments3_Brachy_QE139_Ag683775-924-USHXG01163_NEG_MSMS_MS-ster-Brachy-5-416_IR02_014.h5	2.68089	20180925_AK-JS_Wildermuth_Environments3_Brachy_QE139_Ag683775-924-USHXG01163_NEG_MSMS_MS-ster-Brachy-5-416_IR02_014.h5	2.91	3	93.035,136.892,137.025	0.4354	[M-H]-	137.024	137.024	0.0002	1.294	2.57	3.04	2.68	2.78	0.1	0075_L-homoserine_negative_M-H118p0509_13p48	53308.9	28106.5	19734.3	155001	61594.6	78767	150777	59998.8	15437.5	30250.2	10765.5	10429.8
20	3-methyladenine and/or isomers	Yes	3-methyladenine			C6H7N5	positive	149.07	FSASIHFSFGAIJM-UHFFFAOYSA-N	1	1	1	3	Level 1+			multiple, unresolvable peaks	perfect match to internal reference library	3.46937e+06	20180925_AK-JS_Wildermuth_Environments3_Brachy_QE139_Ag683775-924-USHXG01163_POS_MSMS_MS-nonster-Brachy-1-426_IR01_028.h5	3.26493	20180925_AK-JS_Wildermuth_Environments3_Brachy_QE139_Ag683775-924-USHXG01163_POS_MSMS_MS-nonster-Brachy-5-430_IR01_019.h5	3.6	3	109.052,133.051,150.077	0.9109	[M+H]+	150.077	150.077	0.0002	1.5287	3.49	3.86	3.26	3.63	0.37	0020_3-methyladenine_positive_M+H150p0774_3p26	6836.72	3065.09		3.46937e+06	526407	1.02743e+06	1.20346e+06	2.11455e+06	16421	11666.2	750790	667432
89	4-aminobutanoic acid	Yes	4-aminobutanoic acid			C4H9NO2	positive	103.063	BTCSSZJGUNDROE-UHFFFAOYSA-N	1	1	1	3	Level 1+				perfect match to internal reference library	47529072	20180925_AK-JS_Wildermuth_Environments3_Brachy_QE139_Ag683775-924-USHXG01163_POS_MSMS_MS-nonster-Brachy-1-426_IR01_028.h5	14.0053	20180925_AK-JS_Wildermuth_Environments3_Brachy_QE139_Ag683775-924-USHXG01163_POS_MSMS_MSSuc-ster-Brachy-1-419_IR01_061.h5	14.01	5	68.050,69.034,86.061,87.045,104.071	0.9649	[M+H]+	104.071	104.071	0.0002	1.5973	13.78	14.41	14.01	13.95	0.06	0089_4-aminobutyric_acid_positive_M+H104p0706_14p01	28418.3	18411.3		47529072	15829425	19396998	33538250	32783878	31715.8	212108	2.8111e+06	3047465
84	4-guanidinobutanoic acid	Yes	4-guanidinobutanoic acid			C5H11N3O2	positive	145.085	TUHVEAJXIMEOSA-UHFFFAOYSA-N	1	1	1	3	Level 1+				perfect match to internal reference library	22719182	20180925_AK-JS_Wildermuth_Environments3_Brachy_QE139_Ag683775-924-USHXG01163_POS_MSMS_MSSuc-ster-Brachy-5-423_IR01_058.h5	13.4553	20180925_AK-JS_Wildermuth_Environments3_Brachy_QE139_Ag683775-924-USHXG01163_POS_MSMS_MS-nonster-Brachy-2-427_IR01_010.h5	13.38	9	60.056,69.034,86.061,87.045,104.071,111.055,128.082,129.066,146.092	0.9484	[M+H]+	146.092	146.092	0.0003	2.1555	13.31	13.69	13.46	13.44	0.01	0084_4-Guanidinobutyric_acid_positive_M+H146p0924_13p46	29677.3	14754.8	29534.4	8943163	2.94472e+06	5657254	4368452	3.19061e+06	139928	144599	1231376	841587
48	4-hydroxy-2-quinolinecarboxylic acid	Yes	4-hydroxy-2-quinolinecarboxylic acid			C10H7NO3	positive	189.043	HCZHHEIFKROPDY-UHFFFAOYSA-N	1	1	1	3	Level 1+				perfect match to internal reference library	3.24082e+06	20180925_AK-JS_Wildermuth_Environments3_Brachy_QE139_Ag683775-924-USHXG01163_POS_MSMS_MSSuc-ster-Brachy-5-423_IR01_058.h5	7.47321	20180925_AK-JS_Wildermuth_Environments3_Brachy_QE139_Ag683775-924-USHXG01163_POS_MSMS_MS-nonster-Brachy-3-428_IR01_025.h5	7.5	3	89.039,162.055,190.050	0.9642	[M+H]+	190.05	190.05	0.0003	1.4491	7.44	7.64	7.47	7.5	0.03	0048_kynurenic_acid_positive_M+H190p0499_7p47	238821	118994	131525	2809240	1.19124e+06	2.1649e+06	1.99269e+06	2.04233e+06	254416	377818	379622	335691
16	4-hydroxyphenylacetic acid	Yes	4-hydroxyphenylacetic acid			C8H8O3	negative	152.047	XQXPVVBIMDBYFF-UHFFFAOYSA-N	0	1	1	2	Level 1				no ref match available or no MSMS collected	270210	20180925_AK-JS_Wildermuth_Environments3_Brachy_QE139_Ag683775-924-USHXG01163_NEG_MSMS_MS-ster-TxCtrl-1-417_IR02_071.h5	1.98482						[M-H]-	151.04	151.04	0.0002	1.1731	1.87	2.06	1.98	1.96	0.03	0013_2DEOXYURIDINE_negative_M-H227p0673_1p74				133166	96144.2	49762.6	42410.2	81934.4		8844.88	14841.6	16843.7
80	4-imidazoleacetic acid	Yes	4-imidazoleacetic acid			C5H6N2O2	positive	126.043	PRJKNHOMHKJCEJ-UHFFFAOYSA-N	1	1	1	3	Level 1+				perfect match to internal reference library	1.81022e+06	20180925_AK-JS_Wildermuth_Environments3_Brachy_QE139_Ag683775-924-USHXG01163_POS_MSMS_MS-nonster-Brachy-3-428_IR01_025.h5	13.1789	20180925_AK-JS_Wildermuth_Environments3_Brachy_QE139_Ag683775-924-USHXG01163_POS_MSMS_MS-nonster-Brachy-4-429_IR01_037.h5	13.06	3	81.045,99.055,127.050	0.8838	[M+H]+	127.05	127.05	0.0002	1.3176	12.85	13.28	13.18	13.02	0.16	0080_Imidazole-4-acetic_acid_positive_M+H127p0502_13p18				1.62535e+06	601215	1.81022e+06	805467	637832			1.10284e+06	316526
15	4-pyridoxic acid	Yes	4-pyridoxic acid			C8H9NO4	positive	183.053	HXACOUQIXZGNBF-UHFFFAOYSA-N	1	1	1	3	Level 1+				perfect match to internal reference library	10116285	20180925_AK-JS_Wildermuth_Environments3_Brachy_QE139_Ag683775-924-USHXG01163_POS_MSMS_MSSuc-ster-Brachy-5-423_IR01_058.h5	2.60598	20180925_AK-JS_Wildermuth_Environments3_Brachy_QE139_Ag683775-924-USHXG01163_POS_MSMS_MSSuc-ster-Brachy-5-423_IR01_058.h5	2.72	4	138.055,148.039,166.050,184.060	0.958	[M+H]+	184.06	184.06	0.0002	1.0593	2.64	2.95	2.61	2.75	0.15	0015_4-Pyridoxic_acid_positive_M+H184p0605_2p61		3040.16	3177.19	2.29664e+06	1559099	1.63807e+06	2.23446e+06	2.31956e+06	24980.6	36808.2	855641	1.61162e+06
28	4-quinolinecarboxylic acid and/or isomers	Yes	4-quinolinecarboxylic acid			C10H7NO2	positive	173.048	VQMSRUREDGBWKT-UHFFFAOYSA-N	1	1	0.5	2.5	Level 1+			rt shifted, isomer of library ref	perfect match to internal reference library	10032255	20180925_AK-JS_Wildermuth_Environments3_Brachy_QE139_Ag683775-924-USHXG01163_POS_MSMS_MS-nonster-Brachy-5-430_IR01_019.h5	4.90385	20180925_AK-JS_Wildermuth_Environments3_Brachy_QE139_Ag683775-924-USHXG01163_POS_MSMS_MS-ster-Brachy-4-415_IR01_016.h5	5.47	3	130.065,146.060,174.055	0.9705	[M+H]+	174.055	174.055	0.0002	1.316	5.32	5.75	4.9	5.5	0.6	0028_Quinoline-4-carboxylic_acid_positive_M+H174p0550_4p90				4507482	1276971	2.48795e+06	2.18329e+06	10032255	163156	371407	452398	221275
24	5-methylcytosine	Yes	5-methylcytosine			C5H7N3O	positive	125.059	LRSASMSXMSNRBT-UHFFFAOYSA-N	1	1	1	3	Level 1+				perfect match to internal reference library	1.83995e+06	20180925_AK-JS_Wildermuth_Environments3_Brachy_QE139_Ag683775-924-USHXG01163_POS_MSMS_MS-nonster-Brachy-4-429_IR01_037.h5	3.96153	20180925_AK-JS_Wildermuth_Environments3_Brachy_QE139_Ag683775-924-USHXG01163_POS_MSMS_MS-nonster-Brachy-1-426_IR01_028.h5	3.7	3	83.061,109.040,126.066	0.8075	[M+H]+	126.066	126.066	0.0001	0.8726	3.6	3.92	3.96	3.74	0.22	0024_5-Methylcytosine_positive_M+H126p0662_3p96	14356.2	9521.57	11415.8	796934	798414	1.60144e+06	1.83995e+06	1.13968e+06	49719.9	53242.1	422287	525562
61	5-oxo-proline	Yes	5-oxo-proline			C5H7NO3	negative	129.043	ODHCTXKNWHHXJC-VKHMYHEASA-N	1	1	1	3	Level 1+				perfect match to internal reference library	3.80098e+06	20180925_AK-JS_Wildermuth_Environments3_Brachy_QE139_Ag683775-924-USHXG01163_NEG_MSMS_MS-nonster-Brachy-4-429_IR02_038.h5	11.0652	20180925_AK-JS_Wildermuth_Environments3_Brachy_QE139_Ag683775-924-USHXG01163_NEG_MSMS_MSSuc-ster-Brachy-4-422_IR02_047.h5	11.09	2	82.030,128.036	0.9723	[M-H]-	128.035	128.035	0.0001	0.9595	11	11.29	11.07	11.11	0.04	0041_Orotic_acid_negative_M-H155p0098_7p20	12071.1	9154.99	9739.46	2.36908e+06	882350	1.43292e+06	2.16825e+06	2329090	114714	168790	456969	479557
0	5-valerolactone	Yes	5-valerolactone			C5H8O2	positive	100.052	OZJPLYNZGCXSJM-UHFFFAOYSA-N	0	1	1	2	Level 1				no ref match available or no MSMS collected	9282859	20180925_AK-JS_Wildermuth_Environments3_Brachy_QE139_Ag683775-924-USHXG01163_POS_MSMS_MS-nonster-TxCtrl-2-432_IR01_055.h5	1.10754						[M+H]+	101.06	101.06	0.0002	2.3938	0.73	1.02	1.11	0.83	0.27	0000_delta-Valerolactone_positive_M+H101p0597_1p11	49542.3	77725.3	88022	4469285	3292214	4288292	3886417	2.73639e+06	9215179	9282859	1.48067e+06	859774
9	5'-methylthioadenosine	Yes	5'-methylthioadenosine			C11H15N5O3S	positive	297.09	WUUGFSXJNOTRMR-IOSLPCCCSA-N	1	1	1	3	Level 1+				perfect match to internal reference library	22873412	20180925_AK-JS_Wildermuth_Environments3_Brachy_QE139_Ag683775-924-USHXG01163_POS_MSMS_MSSuc-ster-Brachy-5-423_IR01_058.h5	1.53548	20180925_AK-JS_Wildermuth_Environments3_Brachy_QE139_Ag683775-924-USHXG01163_POS_MSMS_MSSuc-ster-Brachy-5-423_IR01_058.h5	1.55	9	61.011,69.034,75.027,97.029,103.021,136.062,145.032,163.042,298.096	0.911	[M+H]+	298.097	298.096	0.0004	1.3926	1.47	1.76	1.54	1.59	0.06	0009_Methylthioadenosine_positive_M+H298p0969_1p54				3.64105e+06	1.03479e+06	2.1052e+06	2479481	2839631		87171.1	1.62513e+06	1.81083e+06
1	abscisic acid and/or isomers	Yes	abscisic acid			C15H20O4	positive	264.136	JLIDBLDQVAYHNE-YKALOCIXSA-N	0	1	1	2	Level 1			multiple, unresolvable peaks	no ref match available or no MSMS collected	2.18186e+06	20180925_AK-JS_Wildermuth_Environments3_Brachy_QE139_Ag683775-924-USHXG01163_POS_MSMS_MSSuc-ster-Brachy-5-423_IR01_058.h5	1.13535						[M+H]+	265.144	265.143	0.0006	2.1942	1.03	1.26	1.14	1.1	0.04	0001_ABSCISIC_ACID_positive_M+H265p1435_1p14	16841.5	13723.7	21698	235184	232701	327244	331001	304305	395931	756943	139308	212994
13	adenine	Yes	adenine			C5H5N5	positive	135.054	GFFGJBXGBJISGV-UHFFFAOYSA-N	1	1	1	3	Level 1+				perfect match to internal reference library	413678496	20180925_AK-JS_Wildermuth_Environments3_Brachy_QE139_Ag683775-924-USHXG01163_POS_MSMS_MS-nonster-Brachy-1-426_IR01_028.h5	2.3206	20180925_AK-JS_Wildermuth_Environments3_Brachy_QE139_Ag683775-924-USHXG01163_POS_MSMS_MSSuc-ster-Brachy-1-419_IR01_061.h5	2.25	4	94.040,119.035,136.062,137.046	0.9481	[M+H]+	136.062	136.062	0.0002	1.4694	2.14	2.69	2.32	2.29	0.04	0013_adenine_positive_M+H136p0618_2p32	156319	57486	75098	413678496	99159344	243245136	301162016	238687360	3739384	9012721	255493024	301572192
17	adenosine	Yes	adenosine			C10H13N5O4	positive	267.097	OIRDTQYFTABQOQ-KQYNXXCUSA-N	1	1	1	3	Level 1+				perfect match to internal reference library	42570360	20180925_AK-JS_Wildermuth_Environments3_Brachy_QE139_Ag683775-924-USHXG01163_POS_MSMS_MSSuc-ster-Brachy-5-423_IR01_058.h5	2.76373	20180925_AK-JS_Wildermuth_Environments3_Brachy_QE139_Ag683775-924-USHXG01163_POS_MSMS_MS-ster-Brachy-3-414_IR01_067.h5	2.9	2	136.062,268.104	0.9846	[M+H]+	268.104	268.104	0.0004	1.6657	2.53	3.36	2.76	2.73	0.03	0017_adenosine_positive_M+H268p1041_2p76	33857.5	19957.9	24933.5	16512103	5925428	10423428	12308881	12362513	697123	15779019	15718061	8.17145e+06
75	alanine	Yes	alanine			C3H7NO2	positive	89.0477	QNAYBMKLOCPYGJ-REOHCLBHSA-N	0.5	1	1	2.5	Level 1+				partial match of fragments	15102034	20180925_AK-JS_Wildermuth_Environments3_Brachy_QE139_Ag683775-924-USHXG01163_POS_MSMS_MS-nonster-Brachy-4-429_IR01_037.h5	12.9469	20180925_AK-JS_Wildermuth_Environments3_Brachy_QE139_Ag683775-924-USHXG01163_POS_MSMS_MS-nonster-Brachy-2-427_IR01_010.h5	13.06	2	72.081,90.055	0.6703	[M+H]+	90.055	90.0553	0.0004	3.9029	12.73	13.23	12.95	12.96	0.02	0075_L-alanine_positive_M+H90p0550_12p95	11456.3			12640087	3.80499e+06	6677753	15102034	3.32132e+06	39043.3	136690	201727	88103.4
27	allantoin	Yes	allantoin			C4H6N4O3	positive	158.044	POJWUDADGALRAB-UHFFFAOYSA-N	1	1	1	3	Level 1+				perfect match to internal reference library	4.5634e+06	20180925_AK-JS_Wildermuth_Environments3_Brachy_QE139_Ag683775-924-USHXG01163_POS_MSMS_MS-nonster-Brachy-4-429_IR01_037.h5	4.45542	20180925_AK-JS_Wildermuth_Environments3_Brachy_QE139_Ag683775-924-USHXG01163_POS_MSMS_MS-nonster-Brachy-2-427_IR01_010.h5	4.57	6	61.040,73.040,88.051,99.019,116.046,148.977	0.751	[M+H]+	159.051	159.051	0.0002	1.119	4.37	4.9	4.46	4.6	0.15	0027_allantoin_positive_M+H159p0513_4p46				4381468	2.91536e+06	2.47505e+06	4.5634e+06	2.92484e+06	5401.09	22938.7	889952	2.34728e+06
106	arginine	Yes	arginine			C6H14N4O2	positive	174.112	ODKSFYDXXFIFQN-BYPYZUCNSA-N	1	1	1	3	Level 1+				perfect match to internal reference library	57493564	20180925_AK-JS_Wildermuth_Environments3_Brachy_QE139_Ag683775-924-USHXG01163_POS_MSMS_MSSuc-ster-Brachy-5-423_IR01_058.h5	16.921	20180925_AK-JS_Wildermuth_Environments3_Brachy_QE139_Ag683775-924-USHXG01163_POS_MSMS_MS-ster-Brachy-4-415_IR01_016.h5	16.61	12	60.056,70.066,72.081,112.087,113.071,114.103,115.087,116.071,130.098,157.108,158.092,175.119	0.9373	[M+H]+	175.119	175.119	0.0003	1.5043	16.4	16.93	16.92	16.66	0.27	0106_L-arginine_positive_M+H175p1190_16p92	469555	317048	389289	48782604	2.67345e+06	8478630	5.96414e+06	18872160		349940	3.66197e+06	3.58911e+06
90	asparagine	Yes	asparagine			C4H8N2O3	positive	132.053	DCXYFEDJOCDNAF-REOHCLBHSA-N	1	1	1	3	Level 1+				perfect match to internal reference library	26158682	20180925_AK-JS_Wildermuth_Environments3_Brachy_QE139_Ag683775-924-USHXG01163_POS_MSMS_MS-nonster-Brachy-1-426_IR01_028.h5	14.0075	20180925_AK-JS_Wildermuth_Environments3_Brachy_QE139_Ag683775-924-USHXG01163_POS_MSMS_MSSuc-ster-Brachy-4-422_IR01_046.h5	14.15	6	70.030,74.024,87.056,88.040,116.035,133.061	0.9223	[M+H]+	133.061	133.061	0.0001	1.0955	13.88	14.63	14.01	14.26	0.25	0090_L-asparagine_positive_M+H133p0608_14p01				26158682	3712990	8530403	23599324	16024634			714836	2.01831e+06
103	aspartic acid and/or isomers	Yes	aspartic acid			C4H7NO4	positive	133.038	CKLJMWTZIZZHCS-REOHCLBHSA-N	1	1	0.5	2.5	Level 1+			multiple, unresolvable peaks	perfect match to internal reference library	16200783	20180925_AK-JS_Wildermuth_Environments3_Brachy_QE139_Ag683775-924-USHXG01163_POS_MSMS_MSSuc-ster-Brachy-1-419_IR01_061.h5	16.0044	20180925_AK-JS_Wildermuth_Environments3_Brachy_QE139_Ag683775-924-USHXG01163_POS_MSMS_MSSuc-ster-Brachy-1-419_IR01_061.h5	16.5	7	70.029,72.082,74.024,88.040,116.034,134.045,134.063	0.7997	[M+H]+	134.045	134.045	0.0002	1.2639	15.9	17.02	16	16.67	0.66	0103_56-84-8_positive_M+H134p0448_16p00	17183.6	16674.6	16084.2	1.90419e+06	170964	676784	405298	1.02066e+06			4764322	7316272
14	azelaic acid	Yes	azelaic acid			C9H16O4	negative	188.105	BDJRBEYXGGNYIS-UHFFFAOYSA-N	1	1	1	3	Level 1+				perfect match to internal reference library	5.94707e+06	20180925_AK-JS_Wildermuth_Environments3_Brachy_QE139_Ag683775-924-USHXG01163_NEG_MSMS_MS-nonster-Brachy-5-430_IR02_020.h5	1.96336	20180925_AK-JS_Wildermuth_Environments3_Brachy_QE139_Ag683775-924-USHXG01163_NEG_MSMS_MS-nonster-Brachy-5-430_IR02_020.h5	1.81	7	57.034,97.066,123.082,125.097,143.108,169.087,187.098	0.9162	[M-H]-	187.098	187.097	0	0.2147	1.69	2.05	1.96	1.86	0.1	0011_2-Hydroxycinnamic_acid_negative_M-H163p0400_1p53	17685.1			9166486	16828458	8804320	9769920	18301318	28177.5	44683.1	1.77016e+06	2.89155e+06
47	betaine and/or isomers	Yes	betaine			C5H12NO2+	positive	118.086	KWIUHFFTVRNATP-UHFFFAOYSA-O	1	1	1	3	Level 1+			multiple, unresolvable peaks	perfect match to internal reference library	1095462400	20180925_AK-JS_Wildermuth_Environments3_Brachy_QE139_Ag683775-924-USHXG01163_POS_MSMS_MS-nonster-Brachy-1-426_IR01_028.h5	7.27126	20180925_AK-JS_Wildermuth_Environments3_Brachy_QE139_Ag683775-924-USHXG01163_POS_MSMS_MS-nonster-Brachy-3-428_IR01_025.h5	8.08	3	58.066,59.074,118.086	0.9897	[M]+	118.086	118.086	0.0001	0.4872	6.77	8.21	7.27	7.38	0.11	0047_TRIMETHYL_GLYCINE_positive_M118p0863_7p27	1.80812e+06	2.05881e+06	2028096	1095462400	535529184	769102720	816540480	763280384	94399320	312341344	274002304	216519920
19	biotin	Yes	biotin			C10H16N2O3S	positive	244.088	YBJHBAHKTGYVGT-ZKWXMUAHSA-N	1	1	1	3	Level 1+				perfect match to internal reference library	1.92852e+06	20180925_AK-JS_Wildermuth_Environments3_Brachy_QE139_Ag683775-924-USHXG01163_POS_MSMS_MSSuc-ster-Brachy-5-423_IR01_058.h5	3.09725	20180925_AK-JS_Wildermuth_Environments3_Brachy_QE139_Ag683775-924-USHXG01163_POS_MSMS_MSSuc-ster-Brachy-5-423_IR01_058.h5	3.3	10	97.040,123.026,139.057,166.068,167.052,184.079,199.090,209.074,227.085,245.095	0.8535	[M+H]+	245.095	245.095	0.0009	3.7022	3.1	3.53	3.1	3.3	0.2	0019_biotin_positive_M+H245p0955_3p10	5922.69			5450.87		11615.1	9126.56				18516.3
55	bis(3-aminopropyl)amine	Yes	bis(3-aminopropyl)amine			C6H17N3	positive	131.142	OTBHHUPVCYLGQO-UHFFFAOYSA-N	1	1	1	3	Level 1+				perfect match to internal reference library	14141623	20180925_AK-JS_Wildermuth_Environments3_Brachy_QE139_Ag683775-924-USHXG01163_POS_MSMS_MS-ster-TxCtrl-2-418_IR01_049.h5	8.32592	20180925_AK-JS_Wildermuth_Environments3_Brachy_QE139_Ag683775-924-USHXG01163_POS_MSMS_MS-ster-Brachy-3-414_IR01_067.h5	8.57	7	100.094,111.081,114.073,129.105,140.079,158.089,176.113	0.944	[M-H+2Na]+	176.113	176.113	0.0001	0.3386	8.38	8.95	8.33	8.61	0.28	0055_Norspermidine_positive_M-H+2Na176p1133_8p33				5.61973e+06	8.13139e+06	10334392	8737766	5608341	5.80818e+06	9986775	5135073	5233983
46	C6 sugar alcohol peak 1 (ex. sorbitol)	Yes	sorbitol	sorbitol//sorbitol	FBPFZTCFMRRESA-JGWLITMVSA-N//FBPFZTCFMRRESA-JGWLITMVSA-N	C6H14O6	negative	182.079	FBPFZTCFMRRESA-JGWLITMVSA-N	1	1	1	3	Level 1+				perfect match to internal reference library	34115472	20180925_AK-JS_Wildermuth_Environments3_Brachy_QE139_Ag683775-924-USHXG01163_NEG_MSMS_MS-ster-TxCtrl-2-418_IR02_050.h5	8.509	20180925_AK-JS_Wildermuth_Environments3_Brachy_QE139_Ag683775-924-USHXG01163_NEG_MSMS_MS-ster-TxCtrl-2-418_IR02_050.h5	8.1	1	181.072	0	[M+Cl]-	217.048	217.048	0	0.0911	7.83	8.23	8.51	8.13	0.38	0089_Glucuronic_Acid_negative_M-H193p0354_14p90	9378.69	9650.64	8749.26	1157873	2.20608e+06	1.24577e+06	1.22753e+06	2.46244e+06			1.18356e+06	2.16087e+06
52	C6 sugar alcohol peak 2 (ex. mannitol, galactitol)	Yes	galactitol	galactitol//mannitol	FBPFZTCFMRRESA-GUCUJZIJSA-N//FBPFZTCFMRRESA-KVTDHHQDSA-N	C6H14O6	negative	182.079	FBPFZTCFMRRESA-GUCUJZIJSA-N	1	1	1	3	Level 1+			multiple, unresolvable peaks	perfect match to internal reference library	2.67348e+06	20180925_AK-JS_Wildermuth_Environments3_Brachy_QE139_Ag683775-924-USHXG01163_NEG_MSMS_MSSuc-ster-Brachy-2-420_IR02_032.h5	9.05852	20180925_AK-JS_Wildermuth_Environments3_Brachy_QE139_Ag683775-924-USHXG01163_NEG_MSMS_MS-ster-Brachy-2-413_IR02_053.h5	8.73	8	59.013,71.013,73.029,89.024,101.025,113.024,163.061,181.073	0.7065	[M-H]-	181.072	181.072	0.0001	0.3958	8.55	9.03	9.06	8.8	0.26	0091_RAFFINOSE_negative_M-H503p1617_15p31	7643.71		3176.25	442373	144951	176643	210505	150669			69852.4	29182.4
28	caffeic acid and/or isomers	Yes	caffeic acid			C9H8O4	negative	180.042	QAIPRVGONGVQAS-RQOWECAXSA-N	1	1	1	3	Level 1+			multiple, unresolvable peaks	perfect match to internal reference library	1.35117e+06	20180925_AK-JS_Wildermuth_Environments3_Brachy_QE139_Ag683775-924-USHXG01163_NEG_MSMS_MS-nonster-TxCtrl-2-432_IR02_056.h5	2.97965	20180925_AK-JS_Wildermuth_Environments3_Brachy_QE139_Ag683775-924-USHXG01163_NEG_MSMS_MSSuc-ster-TxCtrl-1-424_IR02_044.h5	2.62	2	135.046,179.035	0.865	[M-H]-	179.035	179.035	0.0001	0.3126	2.51	3.44	2.98	3.18	0.2	0021_xanthine_negative_M-H151p0261_2p47	7603.77			2.24065e+06	492994	573567	683455	1406889	193490	932188	19933860	433899
74	carnitine	Yes	carnitine			C7H16NO3+	positive	162.112	PHIQHXFUZVPYII-ZCFIWIBFSA-O	0	1	1	2	Level 1				no ref match available or no MSMS collected	529335	20180925_AK-JS_Wildermuth_Environments3_Brachy_QE139_Ag683775-924-USHXG01163_POS_MSMS_MS-ster-TxCtrl-2-418_IR01_049.h5	12.809						[M]+	162.113	162.112	0.0002	1.3587	12.25	12.75	12.81	12.49	0.32	0074_CHEBI_39547_positive_M162p1125_12p81	37629.1	13255.8	15660.1	167257	101404	138111	167420	127065	113049	291699	54616	57354.1
23	choline o-sulfuric acid	Yes	choline o-sulfuric acid			C5H14NO4S+	positive	184.064	WXCQAWGXWVRCGP-UHFFFAOYSA-O	0.5	1	1	2.5	Level 1+				partial match of fragments	1.95677e+06	20180925_AK-JS_Wildermuth_Environments3_Brachy_QE139_Ag683775-924-USHXG01163_POS_MSMS_MSSuc-ster-TxCtrl-2-425_IR01_073.h5	3.83693	20180925_AK-JS_Wildermuth_Environments3_Brachy_QE139_Ag683775-924-USHXG01163_POS_MSMS_MSSuc-ster-TxCtrl-2-425_IR01_073.h5	3.86	4	60.081,86.097,104.107,184.063	0.8076	[M]+	184.064	184.064	0.0002	0.918	3.7	4.05	3.84	3.84	0	0023_Untitled_positive_M184p0638_3p84		4622.14	3927.71	342316	595002	329407	371242	189814	370941	916298	217091	160622
97	citrulline	Yes	citrulline			C6H13N3O3	positive	175.096	RHGKLRLOHDJJDR-BYPYZUCNSA-N	1	1	1	3	Level 1+				perfect match to internal reference library	1.98235e+06	20180925_AK-JS_Wildermuth_Environments3_Brachy_QE139_Ag683775-924-USHXG01163_POS_MSMS_MSSuc-ster-Brachy-1-419_IR01_061.h5	14.8149	20180925_AK-JS_Wildermuth_Environments3_Brachy_QE139_Ag683775-924-USHXG01163_POS_MSMS_MS-nonster-Brachy-1-426_IR01_028.h5	15.06	8	70.066,113.071,114.055,115.087,116.070,116.972,159.076,176.103	0.9021	[M+H]+	176.103	176.103	0.0002	1.128	14.61	15.25	14.81	15.03	0.21	0097_L-citrulline_positive_M+H176p1030_14p81	28225.6	22061.7	40845.3	1.38089e+06	393949	653000	960550	599448		62346.2	301637	72114.2
81	creatine	Yes	creatine			C4H9N3O2	positive	131.069	CVSVTCORWBXHQV-UHFFFAOYSA-N	0	1	1	2	Level 1				no ref match available or no MSMS collected	421863	20180925_AK-JS_Wildermuth_Environments3_Brachy_QE139_Ag683775-924-USHXG01163_POS_MSMS_MS-ster-TxCtrl-2-418_IR01_049.h5	13.203						[M+H]+	132.077	132.077	0.0001	1.0167	13.1	13.5	13.2	13.22	0.02	0081_creatine_positive_M+H132p0768_13p20				83673.1	40549.5	100970	69754.3	43599.5	37925.8	107318	25812.9	19175.6
22	creatinine	Yes	creatinine			C4H7N3O	positive	113.059	DDRJAANPRJIHGJ-UHFFFAOYSA-N	1	1	1	3	Level 1+				perfect match to internal reference library	3.09514e+06	20180925_AK-JS_Wildermuth_Environments3_Brachy_QE139_Ag683775-924-USHXG01163_POS_MSMS_MS-ster-TxCtrl-2-418_IR01_049.h5	3.61692	20180925_AK-JS_Wildermuth_Environments3_Brachy_QE139_Ag683775-924-USHXG01163_POS_MSMS_MS-ster-TxCtrl-2-418_IR01_049.h5	3.28	4	72.045,86.072,104.082,114.066	0.8493	[M+H]+	114.066	114.066	0.0001	0.5239	3.13	3.58	3.62	3.33	0.29	0022_creatinine_positive_M+H114p0662_3p62	7486.13	11122.6	13116	277036	141419	273988	188575	88662	174509	1.12139e+06	59964.8	50959.8
40	cytidine	Yes	cytidine	cytidine//cytidine	UHDGCWIWMRVCDJ-XVFCMESISA-N//UHDGCWIWMRVCDJ-XVFCMESISA-N	C9H13N3O5	positive	243.086	UHDGCWIWMRVCDJ-XVFCMESISA-N	1	1	1	3	Level 1+				perfect match to internal reference library	55641568	20180925_AK-JS_Wildermuth_Environments3_Brachy_QE139_Ag683775-924-USHXG01163_POS_MSMS_MS-nonster-Brachy-1-426_IR01_028.h5	6.32845	20180925_AK-JS_Wildermuth_Environments3_Brachy_QE139_Ag683775-924-USHXG01163_POS_MSMS_MS-nonster-Brachy-3-428_IR01_025.h5	6.43	3	112.051,244.092,487.178	0.9862	[2M+H]+	487.178	487.178	0.0004	0.9039	6.19	6.57	6.33	6.38	0.05	0040_cytidine_positive_2M+H487p1783_6p33				55641568	10017075	34545556	30616338	10573815			1.05829e+06	1.34074e+06
26	cytosine	Yes	cytosine			C4H5N3O	positive	111.043	OPTASPLRGRRNAP-UHFFFAOYSA-N	1	1	1	3	Level 1+				perfect match to internal reference library	6.35003e+06	20180925_AK-JS_Wildermuth_Environments3_Brachy_QE139_Ag683775-924-USHXG01163_POS_MSMS_MS-nonster-Brachy-1-426_IR01_028.h5	4.35166	20180925_AK-JS_Wildermuth_Environments3_Brachy_QE139_Ag683775-924-USHXG01163_POS_MSMS_MS-ster-Brachy-4-415_IR01_016.h5	4.18	3	69.046,95.024,112.051	0.9381	[M+H]+	112.051	112.051	0.0001	1.1288	4.09	4.42	4.35	4.21	0.14	0026_cytosine_positive_M+H112p0506_4p35	17821.8	10622.9	12637.7	6.35003e+06	2.42075e+06	5.55717e+06	3.7235e+06	2.37947e+06	975690	1.81241e+06	2.52182e+06	1.46425e+06
76	deoxycarnitine	Yes	deoxycarnitine			C7H16NO2+	positive	146.118	JHPNVNIEXXLNTR-UHFFFAOYSA-O	1	1	1	3	Level 1+				perfect match to internal reference library	1.49452e+06	20180925_AK-JS_Wildermuth_Environments3_Brachy_QE139_Ag683775-924-USHXG01163_POS_MSMS_MS-nonster-Brachy-3-428_IR01_025.h5	12.9837	20180925_AK-JS_Wildermuth_Environments3_Brachy_QE139_Ag683775-924-USHXG01163_POS_MSMS_MSSuc-ster-Brachy-5-423_IR01_058.h5	12.55	3	60.082,87.045,146.117	0.9768	[M]+	146.118	146.117	0.0003	1.7896	12.33	12.84	12.98	12.56	0.42	0076_gamma-butyrobetaine_positive_M146p1176_12p98				226601	463599	1.49452e+06	669213	294503	24565.6	44071.3	88829.6	226358
30	deoxycytidine	Yes	deoxycytidine	deoxycytidine//deoxycytidine	CKTSBUTUHBMZGZ-SHYZEUOFSA-N//CKTSBUTUHBMZGZ-SHYZEUOFSA-N	C9H13N3O4	positive	227.091	CKTSBUTUHBMZGZ-SHYZEUOFSA-N	1	1	1	3	Level 1+				co-isolated precursor but all reference ions are in sample spectrum	2.86975e+06	20180925_AK-JS_Wildermuth_Environments3_Brachy_QE139_Ag683775-924-USHXG01163_POS_MSMS_MS-nonster-Brachy-1-426_IR01_028.h5	5.06809	20180925_AK-JS_Wildermuth_Environments3_Brachy_QE139_Ag683775-924-USHXG01163_POS_MSMS_MS-nonster-Brachy-4-429_IR01_037.h5	4.99	3	112.051,228.097,455.186	0.6583	[2M+H]+	455.188	455.187	0.0011	2.5051	4.85	5.17	5.07	4.99	0.08	0030_2deoxycytidine_positive_2M+H455p1885_5p07				2.86975e+06	225485	869510	1.81576e+06	1.12049e+06			328984	559440
13	deoxyuridine	Yes	deoxyuridine			C9H12N2O5	negative	228.075	MXHRCPNRJAMMIM-SHYZEUOFSA-N	0	1	1	2	Level 1				no ref match available or no MSMS collected	133166	20180925_AK-JS_Wildermuth_Environments3_Brachy_QE139_Ag683775-924-USHXG01163_NEG_MSMS_MS-nonster-Brachy-1-426_IR02_029.h5	1.74026						[M-H]-	227.067	227.067	0.0001	0.3499	1.65	1.93	1.74	1.79	0.05	0010_SYRINGIC_ACID_negative_M-H197p0455_1p51				204229	414568	179627	290337	279786	14453.5	18051.6	210801	359812
10	dethiobiotin	Yes	dethiobiotin			C10H18N2O3	positive	214.132	AUTOLBMXDDTRRT-JGVFFNPUSA-N	1	1	1	3	Level 1+				perfect match to internal reference library	17068352	20180925_AK-JS_Wildermuth_Environments3_Brachy_QE139_Ag683775-924-USHXG01163_POS_MSMS_MSSuc-ster-Brachy-5-423_IR01_058.h5	1.82917	20180925_AK-JS_Wildermuth_Environments3_Brachy_QE139_Ag683775-924-USHXG01163_POS_MSMS_MSSuc-ster-Brachy-5-423_IR01_058.h5	1.9	15	67.055,69.070,81.070,93.070,95.086,99.056,109.101,111.055,126.128,136.113,137.096,154.123,179.118,197.128,215.139	0.8436	[M+H]+	215.139	215.138	0.0005	2.3925	1.82	2.13	1.83	1.97	0.14	0010_d-Dethiobiotin_positive_M+H215p1390_1p83	3942.85	4894.18	3437.24	30976.2	19442.9	47202.9	46985.9	27926.5	17871.1	21280.7	62986.8	17753.6
71	dihexose (ex. sucrose, palatinose, maltose, cellobiose, trehalose, melibiose)	Yes	sucrose	cellobiose//maltose//melibiose//palatinose//sucrose//trehalose	GUBGYTABKSRVRQ-CUHNMECISA-N//GUBGYTABKSRVRQ-PICCSMPSSA-N//DLRVVLDZNNYCBX-ABXHMFFYSA-N//PVXPPJIGRGXGCY-TZLCEDOOSA-N//CZMRCDWAGMRECN-UGDNZRGBSA-N//HDTRYLNUVZCQOY-LIZSDCNHSA-N	C12H22O11	negative	342.116	CZMRCDWAGMRECN-UGDNZRGBSA-N	1	1	1	3	Level 1+				perfect match to internal reference library	5155347456	20180925_AK-JS_Wildermuth_Environments3_Brachy_QE139_Ag683775-924-USHXG01163_NEG_MSMS_MSSuc-ster-Brachy-3-421_IR02_065.h5	12.9878	20180925_AK-JS_Wildermuth_Environments3_Brachy_QE139_Ag683775-924-USHXG01163_NEG_MSMS_MS-ster-Brachy-5-416_IR02_014.h5	13.17	15	59.013,71.014,72.993,85.029,87.009,89.024,101.025,113.025,119.035,131.035,143.035,149.046,161.046,179.056,341.109	0.8839	[M-H]-	341.109	341.109	0	0.0224	12.81	14.12	12.99	13.12	0.13	0097_Stachyose_negative_M-H665p2146_16p65				15341.9		8067.5	10989.1	13709			19145.9	6734.95
5	ferulic acid	Yes	ferulic acid			C10H10O4	negative	194.058	KSEBMYQBYZTDHS-HWKANZROSA-N	0	1	1	2	Level 1				no ref match available or no MSMS collected	915160	20180925_AK-JS_Wildermuth_Environments3_Brachy_QE139_Ag683775-924-USHXG01163_NEG_MSMS_MS-nonster-Brachy-5-430_IR02_020.h5	1.26001						[M-H]-	193.051	193.05	0.0002	1.1284	1.25	1.51	1.26	1.38	0.12	0005_ferulic_acid_negative_M-H193p0506_1p26	5682.71			469777	608264	268133	660292	915160	10968	23388.1	218562	292266
95	fumaric acid and/or isomers	Yes	fumaric acid			C4H4O4	negative	116.011	VZCYOOQTPOCHFL-OWOJBTEDSA-N	1	1	1	3	Level 1+			multiple, unresolvable peaks	perfect match to internal reference library	5.17423e+06	20180925_AK-JS_Wildermuth_Environments3_Brachy_QE139_Ag683775-924-USHXG01163_NEG_MSMS_MSSuc-ster-Brachy-4-422_IR02_047.h5	16.4265	20180925_AK-JS_Wildermuth_Environments3_Brachy_QE139_Ag683775-924-USHXG01163_NEG_MSMS_MSSuc-ster-Brachy-2-420_IR02_032.h5	16.09	3	71.013,114.934,115.004	0.8694	[M-H]-	115.004	115.004	0.0001	0.9248	15.53	16.78	16.43	16.21	0.21	0058_L-valine_negative_M-H116p0717_10p50	13911.2	4096.56	6105.17	11855481	2.11567e+06	4.82542e+06	8681622	3435319	3031.83	166185	175435	196972
92	glutamic acid	No, for ID only	glutamic acid			C5H9NO4	negative	147.053	WHUUTDBJXJRKMK-VKHMYHEASA-N	1	1	0.5	2.5	Level 1+				perfect match to internal reference library	14613498	20180925_AK-JS_Wildermuth_Environments3_Brachy_QE139_Ag683775-924-USHXG01163_NEG_MSMS_MS-nonster-Brachy-1-426_IR02_029.h5	15.7695	20180925_AK-JS_Wildermuth_Environments3_Brachy_QE139_Ag683775-924-USHXG01163_NEG_MSMS_MSSuc-ster-Brachy-4-422_IR02_047.h5	16.03	5	82.030,85.029,102.056,128.036,146.046	0.9366	[M-H]-	146.046	146.046	0	0.303	15.98	16.65	15.77	16.31	0.54	0087_N-Methyl-L-glutamic_acid_negative_M-H160p0615_14p87	7656.08	5417.41	6028.95	21150.9	8354.29	10135.7	9107.26	6043.09	9114.08	7352.99	7101.84	5758.29
102	glutamic acid	Yes	glutamic acid			C5H9NO4	positive	147.053	WHUUTDBJXJRKMK-VKHMYHEASA-N	1	1	0.5	2.5	Level 1+				perfect match to internal reference library	17001670	20180925_AK-JS_Wildermuth_Environments3_Brachy_QE139_Ag683775-924-USHXG01163_POS_MSMS_MS-nonster-Brachy-1-426_IR01_028.h5	15.7722	20180925_AK-JS_Wildermuth_Environments3_Brachy_QE139_Ag683775-924-USHXG01163_POS_MSMS_MSSuc-ster-Brachy-4-422_IR01_046.h5	16.02	8	56.050,84.045,85.029,102.055,124.042,130.050,148.061,148.079	0.9115	[M+H]+	148.06	148.06	0.0003	1.7683	15.94	16.74	15.77	16.33	0.56	0102_L-glutamic_acid_positive_M+H148p0605_15p77	24231.9	21171.4		17001670	3414383	5738945	768336	8.10993e+06			1.52217e+06	1.03123e+06
87	glutamine	Yes	glutamine			C5H10N2O3	positive	146.069	ZDXPYRJPNDTMRX-VKHMYHEASA-N	1	1	1	3	Level 1+				perfect match to internal reference library	256582608	20180925_AK-JS_Wildermuth_Environments3_Brachy_QE139_Ag683775-924-USHXG01163_POS_MSMS_MS-nonster-Brachy-4-429_IR01_037.h5	13.9407	20180925_AK-JS_Wildermuth_Environments3_Brachy_QE139_Ag683775-924-USHXG01163_POS_MSMS_MSSuc-ster-Brachy-1-419_IR01_061.h5	14.08	8	56.050,84.045,85.029,101.071,102.055,123.964,130.050,147.076	0.9316	[M+H]+	147.076	147.076	0.0003	2.2123	13.83	14.52	13.94	14.15	0.21	0087_L-glutamine_positive_M+H147p0764_13p94			18284.4	134560368	35932284	71086056	256582608	91782992	51412.3	51839.1	2.65829e+06	4.05941e+06
34	glyceraldehyde or lactic acid	Yes	lactic acid	glyceraldehyde//lactic acid	MNQZXJOMYWMBOU-UHFFFAOYSA-N//JVTAAEKCZFNVCJ-REOHCLBHSA-N	C3H6O3	negative	90.0317	JVTAAEKCZFNVCJ-REOHCLBHSA-N	1	1	0.5	2.5	Level 1+				perfect match to internal reference library	21593698	20180925_AK-JS_Wildermuth_Environments3_Brachy_QE139_Ag683775-924-USHXG01163_NEG_MSMS_MSSuc-ster-Brachy-4-422_IR02_047.h5	4.56438	20180925_AK-JS_Wildermuth_Environments3_Brachy_QE139_Ag683775-924-USHXG01163_NEG_MSMS_MS-ster-Brachy-1-412_IR02_023.h5	5.58	2	71.014,89.024	0.9668	[M-H]-	89.0244	89.0242	0.0002	1.9188	4.67	6.23	4.56	5.62	1.06	0068_4033-40-3_negative_M-H173p0568_12p75	6405.71			155487	78824.5	243241	78085.7	53346.2			12580	5596.52
60	glyceric acid and/or isomers	Yes	glyceric acid			C3H6O4	negative	106.027	RBNPOMFGQQGHHO-UWTATZPHSA-N	1	1	1	3	Level 1+			multiple, unresolvable peaks	perfect match to internal reference library	15438161	20180925_AK-JS_Wildermuth_Environments3_Brachy_QE139_Ag683775-924-USHXG01163_NEG_MSMS_MSSuc-ster-Brachy-4-422_IR02_047.h5	10.9485	20180925_AK-JS_Wildermuth_Environments3_Brachy_QE139_Ag683775-924-USHXG01163_NEG_MSMS_MSSuc-ster-Brachy-2-420_IR02_032.h5	10.85	5	58.005,59.013,72.993,75.008,105.019	0.9475	[M-H]-	105.019	105.019	0.0001	0.6575	10.71	11.17	10.95	10.97	0.02	0040_N-Acetyl-D-Mannosamine_negative_M+Cl256p0593_6p46	4552.12			137733	80984.8	168421	174875	121032			77378.5	104017
34	guanine	Yes	guanine			C5H5N5O	positive	151.049	UYTPUPDQBNUYGX-UHFFFAOYSA-N	1	1	1	3	Level 1+				perfect match to internal reference library	231612128	20180925_AK-JS_Wildermuth_Environments3_Brachy_QE139_Ag683775-924-USHXG01163_POS_MSMS_MS-nonster-Brachy-1-426_IR01_028.h5	5.67359	20180925_AK-JS_Wildermuth_Environments3_Brachy_QE139_Ag683775-924-USHXG01163_POS_MSMS_MS-nonster-Brachy-5-430_IR01_019.h5	5.91	7	109.051,110.035,128.045,134.046,135.030,152.057,153.040	0.956	[M+H]+	152.057	152.056	0.0002	1.3308	5.67	6.29	5.67	5.87	0.2	0034_guanine_positive_M+H152p0567_5p67	21638.2	16407.7	23813.1	231612128	49581136	126701464	113890384	76203432	1.06232e+06	3.05311e+06	31522282	36976708
43	guanosine	Yes	guanosine			C10H13N5O5	negative	283.092	NYHBQMYGNKIUIF-UUOKFMHZSA-N	1	1	1	3	Level 1+				perfect match to internal reference library	155668160	20180925_AK-JS_Wildermuth_Environments3_Brachy_QE139_Ag683775-924-USHXG01163_NEG_MSMS_MS-nonster-Brachy-1-426_IR02_029.h5	7.91272	20180925_AK-JS_Wildermuth_Environments3_Brachy_QE139_Ag683775-924-USHXG01163_NEG_MSMS_MSSuc-ster-Brachy-4-422_IR02_047.h5	8.16	3	133.016,150.042,282.085	0.9404	[M-H]-	282.084	282.084	0	0.0409	7.96	8.27	7.91	8.15	0.24	0031_2-deoxyglucose_negative_M-H163p0612_3p37				92864.3	91828.7	168050	85681.8	91960.5	17554.1	15930.8	54521.8	46907.8
92	hexosamine	Yes	mannosamine	galactosamine//glucosamine//mannosamine	MSWZFWKMSRAUBD-GASJEMHNSA-N//MSWZFWKMSRAUBD-IVMDWMLBSA-N//MSWZFWKMSRAUBD-CBPJZXOFSA-N	C6H13NO5	positive	179.079	MSWZFWKMSRAUBD-CBPJZXOFSA-N	1	1	0.5	2.5	Level 1+				perfect match to internal reference library	111393040	20180925_AK-JS_Wildermuth_Environments3_Brachy_QE139_Ag683775-924-USHXG01163_POS_MSMS_MSSuc-ster-Brachy-1-419_IR01_061.h5	14.1477	20180925_AK-JS_Wildermuth_Environments3_Brachy_QE139_Ag683775-924-USHXG01163_POS_MSMS_MSSuc-ster-Brachy-1-419_IR01_061.h5	14.84	29	60.045,60.082,61.029,68.050,69.034,70.066,72.045,73.029,80.050,81.034,84.045,85.029,96.045,96.996,97.029,98.060,99.044,102.055,108.044,114.055,115.039,116.071,126.055,127.039,144.065,145.049,162.076,180.088,180.105	0.8466	[M+H]+	180.087	180.086	0.0004	2.0901	12.86	15.04	14.15	13.23	0.92	0092_D-Mannosamine_positive_M+H180p0867_14p15			29632.8	2287803	2072466	25292288	148980	46668.5	52090.5	42275.9	8.31851e+06	64313.6
98	hexose phosphate	Yes	glucose 6-phosphoric acid	alpha-galactose 1-phosphoric acid//alpha-glucose 1-phosphoric acid//fructose 6-phosphoric acid//glucose 6-phosphoric acid//mannose 6-phosphoric acid	HXXFSFRBOHSIMQ-FPRJBGLDSA-N//HXXFSFRBOHSIMQ-VFUOTHLCSA-N//BGWGXPAPYGQALX-VRPWFDPXSA-N//NBSCHQHZLSJFNQ-GASJEMHNSA-N//NBSCHQHZLSJFNQ-QTVWNMPRSA-N	C6H13O9P	negative	260.03	NBSCHQHZLSJFNQ-GASJEMHNSA-N	1	1	1	3	Level 1+			multiple, unresolvable peaks	perfect match to internal reference library	1.63062e+06	20180925_AK-JS_Wildermuth_Environments3_Brachy_QE139_Ag683775-924-USHXG01163_NEG_MSMS_MSSuc-ster-Brachy-1-419_IR02_062.h5	16.7063	20180925_AK-JS_Wildermuth_Environments3_Brachy_QE139_Ag683775-924-USHXG01163_NEG_MSMS_MSSuc-ster-Brachy-4-422_IR02_047.h5	16.25	5	78.959,96.970,138.980,168.991,259.022	0.8433	[M-H]-	259.022	259.022	0.0009	3.4707	15.96	17.02	16.71	16.69	0.02	0095_fumaric_acid_negative_M-H115p0037_16p43	32817.9	26441.8	15818.3	2.9001e+06	13433.1	12832.7	8409.25	2227739	6718.03		310843	373129
70	histamine	Yes	histamine			C5H9N3	positive	111.08	NTYJJOPFIAHURM-UHFFFAOYSA-N	1	1	1	3	Level 1+				perfect match to internal reference library	97709464	20180925_AK-JS_Wildermuth_Environments3_Brachy_QE139_Ag683775-924-USHXG01163_POS_MSMS_MS-nonster-Brachy-1-426_IR01_028.h5	11.6241	20180925_AK-JS_Wildermuth_Environments3_Brachy_QE139_Ag683775-924-USHXG01163_POS_MSMS_MSSuc-ster-Brachy-4-422_IR01_046.h5	11.43	4	68.050,83.061,95.061,112.087	0.9757	[M+H]+	112.087	112.087	0.0001	0.7589	10.95	11.54	11.62	11.23	0.4	0070_histamine_positive_M+H112p0869_11p62	5677.54	7100.58		97709464	38099712	56824836	56449068	85160520	15509.9	30674.6	25206084	33283402
94	histidine	Yes	histidine			C6H9N3O2	positive	155.069	HNDVDQJCIGZPNO-YFKPBYRVSA-N	0	1	1	2	Level 1				no ref match available or no MSMS collected	2.13319e+06	20180925_AK-JS_Wildermuth_Environments3_Brachy_QE139_Ag683775-924-USHXG01163_POS_MSMS_MSSuc-ster-Brachy-1-419_IR01_061.h5	14.5493						[M+H]+	156.077	156.077	0.0002	0.9929	14.63	15.3	14.55	14.93	0.38	0094_L-histidine_positive_M+H156p0768_14p55	16879.6	24220.1	36533.4	969457	149702	517445	836663	484361	21195.3	35099.6	67044.1	89777.3
72	histidinol	Yes	histidinol			C6H11N3O	positive	141.09	ZQISRDCJNBUVMM-YFKPBYRVSA-N	1	1	1	3	Level 1+				perfect match to internal reference library	17634330	20180925_AK-JS_Wildermuth_Environments3_Brachy_QE139_Ag683775-924-USHXG01163_POS_MSMS_MS-nonster-Brachy-1-426_IR01_028.h5	12.4482	20180925_AK-JS_Wildermuth_Environments3_Brachy_QE139_Ag683775-924-USHXG01163_POS_MSMS_MS-nonster-Brachy-3-428_IR01_025.h5	11.89	13	56.050,60.045,69.045,80.050,81.045,83.061,95.061,97.076,99.056,107.061,124.087,125.071,142.097	0.9231	[M+H]+	142.097	142.097	0.0002	1.0591	11.75	12.33	12.45	12.01	0.44	0072_L-histidinol_positive_M+H142p0975_12p45		8843.91	7441.98	17634330	5.57101e+06	7.48576e+06	9699816	7.22736e+06	12292.1	15466.2	1719327	3.57188e+06
20	hydroxybutyric acid	Yes	alpha-hydroxyisobutyric acid			C4H8O3	negative	104.047	BWLBGMIXKSTLSX-UHFFFAOYSA-N	0.5	1	1	2.5	Level 1+				partial match of fragments	4483128	20180925_AK-JS_Wildermuth_Environments3_Brachy_QE139_Ag683775-924-USHXG01163_NEG_MSMS_MS-ster-TxCtrl-1-417_IR02_071.h5	2.44961	20180925_AK-JS_Wildermuth_Environments3_Brachy_QE139_Ag683775-924-USHXG01163_NEG_MSMS_MS-ster-TxCtrl-1-417_IR02_071.h5	2.52	2	59.013,103.040	0.1697	[M-H]-	103.04	103.04	0	0.2582	2.44	2.72	2.45	2.58	0.13	0065_histamine_negative_M-H110p0723_11p63		2711.05		204462	67232	81220.9	99081.1	160885	4200.56	5664.92	40321.3	48340.6
11	hydroxycinnamic acid	Yes	2-hydroxycinnamic acid	2-hydroxycinnamic acid//4-coumaric acid	PMOWTIHVNWZYFI-AATRIKPKSA-N//NGSWKAQJJWESNS-ZZXKWVIFSA-N	C9H8O3	negative	164.047	PMOWTIHVNWZYFI-AATRIKPKSA-N	1	1	1	3	Level 1+				perfect match to internal reference library	18301318	20180925_AK-JS_Wildermuth_Environments3_Brachy_QE139_Ag683775-924-USHXG01163_NEG_MSMS_MS-nonster-Brachy-5-430_IR02_020.h5	1.53356	20180925_AK-JS_Wildermuth_Environments3_Brachy_QE139_Ag683775-924-USHXG01163_NEG_MSMS_MS-nonster-Brachy-1-426_IR02_029.h5	1.54	3	93.035,119.050,163.040	0.8232	[M-H]-	163.04	163.04	0	0.092	1.43	1.86	1.53	1.59	0.06	0064_taurine_negative_M-H124p0074_11p60	10310.7	3230.22	5800.22	92452.4	19560.4	26741.3	25378.8	20007.4	7841.36	19534.8	33399.8	4758.85
18	hypoxanthine	Yes	hypoxanthine			C5H4N4O	positive	136.039	FDGQSTZJBFJUBT-UHFFFAOYSA-N	1	1	1	3	Level 1+				perfect match to internal reference library	166108336	20180925_AK-JS_Wildermuth_Environments3_Brachy_QE139_Ag683775-924-USHXG01163_POS_MSMS_MS-ster-TxCtrl-1-417_IR01_070.h5	2.78224	20180925_AK-JS_Wildermuth_Environments3_Brachy_QE139_Ag683775-924-USHXG01163_POS_MSMS_MS-nonster-Brachy-2-427_IR01_010.h5	2.88	2	94.040,137.046	0.9872	[M+H]+	137.046	137.046	0.0002	1.1583	2.62	3.17	2.78	2.84	0.05	0018_hypoxanthine_positive_M+H137p0458_2p78	132890	192234	203582	19242110	2.37654e+06	5.00052e+06	3745992	6430999	1.85416e+06	3833825	49461564	4578874
2	indole-3-pyruvic acid	Yes	indole-3-pyruvic acid			C11H9NO3	negative	203.058	RSTKLPZEZYGQPY-UHFFFAOYSA-N	0	1	1	2	Level 1				no ref match available or no MSMS collected	564973	20180925_AK-JS_Wildermuth_Environments3_Brachy_QE139_Ag683775-924-USHXG01163_NEG_MSMS_MS-ster-TxCtrl-1-417_IR02_071.h5	1.11907						[M-H]-	202.051	202.051	0.0002	0.7575	0.83	0.98	1.12	0.88	0.24	0002_Indole-3-pyruvic_acid_negative_M-H202p0509_1p12		8108.49	7212.64	76546	43020.5	28222.9	60135.6	48358.8	15523.3	12791.4	238052	23906.8
29	inosine	Yes	inosine			C10H12N4O5	positive	268.081	UGQMRVRMYYASKQ-KQYNXXCUSA-N	1	1	1	3	Level 1+				perfect match to internal reference library	1.84313e+06	20180925_AK-JS_Wildermuth_Environments3_Brachy_QE139_Ag683775-924-USHXG01163_POS_MSMS_MSSuc-ster-Brachy-5-423_IR01_058.h5	4.90429	20180925_AK-JS_Wildermuth_Environments3_Brachy_QE139_Ag683775-924-USHXG01163_POS_MSMS_MSSuc-ster-Brachy-5-423_IR01_058.h5	4.94	1	137.046	0	[M+H]+	269.088	269.087	0.0007	2.6023	4.76	5.2	4.9	5.01	0.11	0029_inosine_positive_M+H269p0881_4p90				948727	158481	255914	288719	308744		43390.1	200340	166112
47	Isomer of dopamine	Yes	dopamine			C8H11NO2	negative	153.079	VYFYYTLLBUKUHU-UHFFFAOYSA-N	1	1	1	3	Level 1+				perfect match to internal reference library	100107440	20180925_AK-JS_Wildermuth_Environments3_Brachy_QE139_Ag683775-924-USHXG01163_NEG_MSMS_MS-ster-Brachy-5-416_IR02_014.h5	8.58312	20180925_AK-JS_Wildermuth_Environments3_Brachy_QE139_Ag683775-924-USHXG01163_NEG_MSMS_MS-ster-Brachy-2-413_IR02_053.h5	8.97	8	122.038,123.045,124.017,136.017,137.025,152.072,153.019,154.027	0.9409	[M-H]-	152.072	152.072	0	0.2131	8.77	9.33	8.58	9.01	0.43	0033_glyceraldehyde_negative_M-H89p0244_4p54	178172	44382.1	64490.6	12034554	19443642	12301660	8750946	14137307	132295	3.53582e+06	1522901	599243
33	isonicotinic acid or isomer	Yes	isonicotinic acid			C6H5NO2	positive	123.032	TWBYWOBDOCUKOW-UHFFFAOYSA-N	1	1	0.5	2.5	Level 1+				perfect match to internal reference library	1.74185e+06	20180925_AK-JS_Wildermuth_Environments3_Brachy_QE139_Ag683775-924-USHXG01163_POS_MSMS_MS-nonster-Brachy-4-429_IR01_037.h5	5.42012	20180925_AK-JS_Wildermuth_Environments3_Brachy_QE139_Ag683775-924-USHXG01163_POS_MSMS_MS-nonster-Brachy-3-428_IR01_025.h5	5.99	3	80.050,96.045,124.039	0.9298	[M+H]+	124.039	124.039	0	0.3079	5.66	6.59	5.42	5.98	0.56	0033_ISONICOTINIC_ACID_positive_M+H124p0393_5p42	30684.7	31150	23844.3	1.41236e+06	530205	882822	1.74185e+06	1.54031e+06	310888	752053	894338	1115768
59	kynurenine	Yes	kynurenine			C10H12N2O3	positive	208.085	YGPSJZOEDVAXAB-QMMMGPOBSA-N	0	1	1	2	Level 1				no ref match available or no MSMS collected	301533	20180925_AK-JS_Wildermuth_Environments3_Brachy_QE139_Ag683775-924-USHXG01163_POS_MSMS_MS-nonster-Brachy-3-428_IR01_025.h5	8.78535						[M+H]+	209.092	209.092	0.0002	1.0634	8.93	9.36	8.79	9.12	0.33	0059_L-kynurenine_positive_M+H209p0921_8p79				298097	25054.6	301533	44123.4	36883.1	6494.68		9230.72	9132.69
48	leucine/norleucine/isoleucine	Yes	leucine	isoleucine//leucine//norleucine	AGPKZVBTJJNPAG-WHFBIAKZSA-N//ROHFNLRQFUQHCH-UHFFFAOYSA-N//LRQKBLKVPFOOQJ-YFKPBYRVSA-N	C6H13NO2	negative	131.095	ROHFNLRQFUQHCH-UHFFFAOYSA-N	1	1	1	3	Level 1+			multiple, unresolvable peaks	perfect match to internal reference library	10758314	20180925_AK-JS_Wildermuth_Environments3_Brachy_QE139_Ag683775-924-USHXG01163_NEG_MSMS_MS-nonster-Brachy-1-426_IR02_029.h5	8.66047	20180925_AK-JS_Wildermuth_Environments3_Brachy_QE139_Ag683775-924-USHXG01163_NEG_MSMS_MSSuc-ster-Brachy-5-423_IR02_059.h5	8.89	1	130.087	0	[M-H]-	130.087	130.087	0	0.2718	8.5	9.53	8.66	8.89	0.23	0079_4-aminobutyric_acid_negative_M-H102p0560_14p00	9185.56	4073.5		2.70552e+06	1063808	1.12478e+06	2.09892e+06	2.01927e+06	5486.53	14262.9	103405	104615
2	lumichrome	Yes	lumichrome			C12H10N4O2	positive	242.08	ZJTJUVIJVLLGSP-UHFFFAOYSA-N	0	1	1	2	Level 1				no ref match available or no MSMS collected	725824	20180925_AK-JS_Wildermuth_Environments3_Brachy_QE139_Ag683775-924-USHXG01163_POS_MSMS_MSSuc-ster-Brachy-5-423_IR01_058.h5	1.14947						[M+H]+	243.088	243.088	0.0002	0.8859	1.12	1.23	1.15	1.17	0.02	0002_lumichrome_positive_M+H243p0877_1p15	7819.81		10538.2	294371	132319	189736	237774	179743	63494.4	125002	96421	213647
107	lysine	Yes	lysine			C6H14N2O2	positive	146.106	KDXKERNSBIXSRK-YFKPBYRVSA-N	0	1	1	2	Level 1				no ref match available or no MSMS collected	1721186	20180925_AK-JS_Wildermuth_Environments3_Brachy_QE139_Ag683775-924-USHXG01163_POS_MSMS_MSSuc-ster-Brachy-2-420_IR01_031.h5	17.0109						[M+H]+	147.113	147.113	0.0002	1.3773	16.82	17	17.01	16.92	0.09	0107_L-lysine_positive_M+H147p1128_17p01	53364.3	30124.7	29425.9	345033			284717	240051
102	malic acid and/or isomers	Yes	malic acid			C4H6O5	negative	134.022	BJEPYKJPYRNKOW-UWTATZPHSA-N	1	1	0.5	2.5	Level 1+			multiple, unresolvable peaks	perfect match to internal reference library	32288968	20180925_AK-JS_Wildermuth_Environments3_Brachy_QE139_Ag683775-924-USHXG01163_NEG_MSMS_MSSuc-ster-Brachy-4-422_IR02_047.h5	17.0693	20180925_AK-JS_Wildermuth_Environments3_Brachy_QE139_Ag683775-924-USHXG01163_NEG_MSMS_MS-nonster-Brachy-5-430_IR02_020.h5	16.63	9	59.013,71.013,72.993,87.009,89.024,115.004,132.868,133.014,133.029	0.9456	[M-H]-	133.014	133.014	0.0002	1.5702	15.56	17.08	17.07	16.33	0.74	0062_L-tyrosine_negative_M-H180p0666_11p28	8057.71	6028.9	5752.17	1.74817e+06	276964	684969	765809	512431	9709.35	58973.2	263738	64918.5
63	methionine	Yes	methionine			C5H11NO2S	positive	149.051	FFEARJCKVFRZRR-BYPYZUCNSA-N	1	1	1	3	Level 1+				perfect match to internal reference library	1.18817e+06	20180925_AK-JS_Wildermuth_Environments3_Brachy_QE139_Ag683775-924-USHXG01163_POS_MSMS_MS-nonster-Brachy-1-426_IR01_028.h5	9.8021	20180925_AK-JS_Wildermuth_Environments3_Brachy_QE139_Ag683775-924-USHXG01163_POS_MSMS_MS-nonster-Brachy-1-426_IR01_028.h5	9.95	13	56.050,61.011,74.024,74.061,85.029,87.027,102.055,104.053,133.032,150.026,150.060,150.077,150.111	0.7886	[M+H]+	150.058	150.058	0.0002	1.4393	9.82	10.49	9.8	10.03	0.23	0063_L-methionine_positive_M+H150p0583_9p80				1.18817e+06	213117	640213	732354	422684		26530.3	87163.8	27187.9
30	methyl beta-galactoside	Yes	methyl beta-galactoside			C7H14O6	negative	194.079	HOVAGTYPODGVJG-VOQCIKJUSA-N	1	1	0.5	2.5	Level 1+				perfect match to internal reference library	184982896	20180925_AK-JS_Wildermuth_Environments3_Brachy_QE139_Ag683775-924-USHXG01163_NEG_MSMS_MSSuc-ster-Brachy-4-422_IR02_047.h5	3.09469	20180925_AK-JS_Wildermuth_Environments3_Brachy_QE139_Ag683775-924-USHXG01163_NEG_MSMS_MSSuc-ster-Brachy-1-419_IR02_062.h5	1.93	20	55.018,57.034,58.005,59.013,71.014,72.993,73.029,83.014,85.029,87.009,89.024,95.014,97.030,99.009,101.025,112.017,113.025,131.036,161.045,193.072	0.8135	[M-H]-	193.072	193.072	0.0001	0.4006	1.92	3.84	3.09	2.11	0.98	0023_uridine_negative_M-H243p0622_2p61				24512798	8645382	7.9148e+06	7.43461e+06	11813566	14256.9	125643	4.0111e+06	4605419
3	methyl indole-3-acetic acid	Yes	methyl indole-3-acetic acid			C11H11NO2	positive	189.079	KTHADMDGDNYQRX-UHFFFAOYSA-N	0	1	1	2	Level 1				no ref match available or no MSMS collected	5.28437e+06	20180925_AK-JS_Wildermuth_Environments3_Brachy_QE139_Ag683775-924-USHXG01163_POS_MSMS_MS-ster-Brachy-2-413_IR01_052.h5	1.15652						[M+H]+	190.086	190.086	0.0003	1.5784	0.81	1.07	1.16	0.89	0.27	0003_methyl_21H-indol-3-yl_acetate_positive_M+H190p0863_1p16	9280.43	14714.4	17415	3.50056e+06	820593	1.65242e+06	2.29358e+06	1.64307e+06	121105	274289	2752683	5.28437e+06
8	methylglutaric acid	Yes	mono-methyl glutaric acid			C6H10O4	positive	146.058	IBMRTYCHDPMBFN-UHFFFAOYSA-N	0	1	1	2	Level 1				no ref match available or no MSMS collected	7589751	20180925_AK-JS_Wildermuth_Environments3_Brachy_QE139_Ag683775-924-USHXG01163_POS_MSMS_MSSuc-ster-Brachy-1-419_IR01_061.h5	1.41095						[M+H]+	147.065	147.065	0.0002	1.3247	1.44	1.78	1.41	1.62	0.21	0008_5-Methoxy-5-oxopentanoic_acid_positive_M+H147p0652_1p41	4840.6	9003.52	8137	91757.4	61717.9	139169	129264	120907	1.69949e+06	1.02642e+06	261998	154274
50	N-acetyl-alanine and/or isomers	Yes	N-acetyl-alanine			C5H9NO3	positive	131.058	KTHDTJVBEPMMGL-VKHMYHEASA-N	0.5	1	0.5	2	Level 1			multiple, unresolvable peaks	partial match of fragments	5272241	20180925_AK-JS_Wildermuth_Environments3_Brachy_QE139_Ag683775-924-USHXG01163_POS_MSMS_MSSuc-ster-Brachy-3-421_IR01_064.h5	7.69842	20180925_AK-JS_Wildermuth_Environments3_Brachy_QE139_Ag683775-924-USHXG01163_POS_MSMS_MS-ster-TxCtrl-1-417_IR01_070.h5	8.29	5	72.081,86.061,90.904,108.914,131.930	0.452	[M+H]+	132.065	132.065	0.0001	0.7856	7.76	8.76	7.7	8.24	0.55	0050_N-Acetyl-L-alanine_positive_M+H132p0655_7p70	3307.77			4098870	4958228	3.16264e+06	3925630	2.80162e+06	261933	623257	475242	331287
84	N-acetyl-aspartic acid	Yes	N-acetyl-aspartic acid			C6H9NO5	negative	175.048	OTCCIMWXFLJLIA-BYPYZUCNSA-N	1	1	1	3	Level 1+				perfect match to internal reference library	771376	20180925_AK-JS_Wildermuth_Environments3_Brachy_QE139_Ag683775-924-USHXG01163_NEG_MSMS_MS-ster-TxCtrl-1-417_IR02_071.h5	14.513	20180925_AK-JS_Wildermuth_Environments3_Brachy_QE139_Ag683775-924-USHXG01163_NEG_MSMS_MS-ster-TxCtrl-1-417_IR02_071.h5	14.39	10	58.029,59.013,71.014,88.040,112.041,114.020,115.004,130.051,156.031,174.041	0.8036	[M-H]-	174.041	174.041	0.0002	1.0639	14.3	14.48	14.51	14.4	0.12	0052_galactitol_negative_M-H181p0717_9p06	9521.83			459282	260194	46785.9	162908	474647	39282.6	96538.5	295934	482428
88	N-acetyl-glutamic acid and/or isomers	Yes	N-acetyl-glutamic acid			C7H11NO5	negative	189.064	RFMMMVDNIPUKGG-YFKPBYRVSA-N	1	1	1	3	Level 1+			multiple, unresolvable peaks	perfect match to internal reference library	5987327	20180925_AK-JS_Wildermuth_Environments3_Brachy_QE139_Ag683775-924-USHXG01163_NEG_MSMS_MS-ster-TxCtrl-1-417_IR02_071.h5	14.8869	20180925_AK-JS_Wildermuth_Environments3_Brachy_QE139_Ag683775-924-USHXG01163_NEG_MSMS_MS-nonster-Brachy-2-427_IR02_011.h5	14.98	11	58.029,59.013,100.041,100.077,102.056,126.056,128.035,144.067,146.046,170.046,188.057	0.8962	[M-H]-	188.056	188.056	0.0001	0.5646	14.87	15.14	14.89	15	0.12	0056_2_3Cyclic_AMP_negative_M-H328p0452_10p04	2583.25			128848	68170.2	109918	208167	125030			58459.5	49974.6
39	N-acetyl-hexosamine	Yes	N-acetyl-glucosamine	N-acetyl-galactosamine//N-acetyl-galactosamine//N-acetyl-glucosamine//N-acetyl-glucosamine//N-acetyl-mannosamine//N-acetyl-mannosamine//N-acetyl-mannosamine	OVRNDRQMDRJTHS-CBQIKETKSA-N//OVRNDRQMDRJTHS-CBQIKETKSA-N//OVRNDRQMDRJTHS-RTRLPJTCSA-N//OVRNDRQMDRJTHS-RTRLPJTCSA-N//OVRNDRQMDRJTHS-ZTVVOAFPSA-N//OVRNDRQMDRJTHS-ZTVVOAFPSA-N//OVRNDRQMDRJTHS-ZTVVOAFPSA-N	C8H15NO6	positive	221.09	OVRNDRQMDRJTHS-RTRLPJTCSA-N	1	1	1	3	Level 1+				perfect match to internal reference library	9957300	20180925_AK-JS_Wildermuth_Environments3_Brachy_QE139_Ag683775-924-USHXG01163_POS_MSMS_MS-nonster-Brachy-4-429_IR01_037.h5	6.32767	20180925_AK-JS_Wildermuth_Environments3_Brachy_QE139_Ag683775-924-USHXG01163_POS_MSMS_MS-nonster-Brachy-4-429_IR01_037.h5	6.35	20	60.045,61.029,72.045,80.050,81.034,84.045,96.045,97.029,98.060,109.028,114.055,126.055,127.039,138.055,140.070,144.065,162.075,168.065,186.076,204.086	0.8911	[M+H-H2O]+	204.087	204.086	0.0002	1.1535	6.02	6.62	6.33	6.31	0.02	0039_N-Acetyl-D-Glucosamine_positive_M+H-H2O204p0866_6p33		3671.79	6019.59	3.08414e+06	4.66522e+06	6.778e+06	9957300	2515294	29902	45204.5	1.52163e+06	1.80665e+06
21	N-acetyl-phenylalanine	Yes	N-acetyl-phenylalanine			C11H13NO3	positive	207.09	CBQJSKKFNMDLON-JTQLQIEISA-N	0	1	1	2	Level 1				no ref match available or no MSMS collected	2.22051e+06	20180925_AK-JS_Wildermuth_Environments3_Brachy_QE139_Ag683775-924-USHXG01163_POS_MSMS_MS-nonster-Brachy-4-429_IR01_037.h5	3.493						[M+H]+	208.097	208.096	0.0003	1.5518	3.66	3.92	3.49	3.78	0.29	0021_N-Acetyl-L-phenylalanine_positive_M+H208p0968_3p49	4001.54	6827.14	10320.7	158762	189883	189026	2.22051e+06	780458	18189.2	29998.7	82029.6	152488
63	N-acetyl-serine	Yes	N-acetyl-serine			C5H9NO4	negative	147.053	JJIHLJJYMXLCOY-UHFFFAOYSA-N	0	1	1	2	Level 1				no ref match available or no MSMS collected	117747	20180925_AK-JS_Wildermuth_Environments3_Brachy_QE139_Ag683775-924-USHXG01163_NEG_MSMS_MS-nonster-Brachy-1-426_IR02_029.h5	11.301						[M-H]-	146.046	146.046	0	0.0916	11.24	11.41	11.3	11.34	0.04	0083_melibiose_negative_M-H341p1089_14p44	270100	1.0069e+06	5471254	153725664	156608816	2347968000	8858804	3.21546e+06	971928	2.26255e+06	730815680	2.93033e+06
62	N-acetylputrescine and/or isomers	Yes	N-acetylputrescine			C6H14N2O	positive	130.111	KLZGKIDSEJWEDW-UHFFFAOYSA-N	1	1	1	3	Level 1+			multiple, unresolvable peaks	perfect match to internal reference library	7644207	20180925_AK-JS_Wildermuth_Environments3_Brachy_QE139_Ag683775-924-USHXG01163_POS_MSMS_MSSuc-ster-Brachy-5-423_IR01_058.h5	9.66488	20180925_AK-JS_Wildermuth_Environments3_Brachy_QE139_Ag683775-924-USHXG01163_POS_MSMS_MS-ster-TxCtrl-1-417_IR01_070.h5	9.03	5	60.045,72.045,72.081,114.092,131.118	0.9145	[M+H]+	131.118	131.118	0.0001	0.785	8.91	9.96	9.66	9.6	0.06	0062_N4-aminobutyl_acetamide_positive_M+H131p1179_9p66		6388.94	5856.65	594648	126145	258183	357005	169399	22535.4	25017	545420	128621
68	N-alpha-acetyl-asparagine	Yes	n-alpha-acetyl-asparagine			C6H10N2O4	negative	174.064	HXFOXFJUNFFYMO-BYPYZUCNSA-N	0	1	1	2	Level 1				no ref match available or no MSMS collected	243241	20180925_AK-JS_Wildermuth_Environments3_Brachy_QE139_Ag683775-924-USHXG01163_NEG_MSMS_MS-nonster-Brachy-3-428_IR02_026.h5	12.7506						[M-H]-	173.057	173.056	0.0003	1.8394	12.37	12.76	12.75	12.59	0.16	0047_dopamine_negative_M-H152p0717_8p58	18729.7	15167.1	17377.3	2.56448e+06	3785132	2.7318e+06	13094221	5848161	18079.6	23803.4	4498974	29290880
98	N-alpha-acetyl-lysine	Yes	N-alpha-acetyl-lysine			C8H16N2O3	positive	188.116	VEYYWZRYIYDQJM-ZETCQYMHSA-N	1	1	1	3	Level 1+				perfect match to internal reference library	40275456	20180925_AK-JS_Wildermuth_Environments3_Brachy_QE139_Ag683775-924-USHXG01163_POS_MSMS_MS-ster-TxCtrl-1-417_IR01_070.h5	14.8546	20180925_AK-JS_Wildermuth_Environments3_Brachy_QE139_Ag683775-924-USHXG01163_POS_MSMS_MS-ster-TxCtrl-1-417_IR01_070.h5	14.87	12	60.045,84.081,112.076,126.091,129.102,130.086,147.113,153.102,154.086,171.113,172.097,189.123	0.5451	[M+H]+	189.123	189.123	0.0004	2.1411	14.76	15.03	14.85	14.87	0.02	0098_1946-82-3_positive_M+H189p1234_14p85			16045.8	50317.2	23475.8	30055.8	49321.6	25410.4			7.42814e+06	28340.3
99	N-methyl-glutamic acid	Yes	N-methyl-glutamic acid			C6H11NO4	positive	161.069	XLBVNMSMFQMKEY-BYPYZUCNSA-N	0.5	1	1	2.5	Level 1+				partial match of fragments	71157024	20180925_AK-JS_Wildermuth_Environments3_Brachy_QE139_Ag683775-924-USHXG01163_POS_MSMS_MSSuc-ster-Brachy-1-419_IR01_061.h5	14.8682	20180925_AK-JS_Wildermuth_Environments3_Brachy_QE139_Ag683775-924-USHXG01163_POS_MSMS_MSSuc-ster-Brachy-4-422_IR01_046.h5	14.99	6	70.066,85.029,98.060,116.071,144.066,162.076	0.4892	[M+H]+	162.076	162.076	0.0004	2.7009	14.6	15.05	14.87	14.69	0.18	0099_N-Methyl-L-glutamic_acid_positive_M+H162p0761_14p87	18193.2	16802	13471.9	2.35038e+06	47038.1	65742.8	35811.7	33420.5	36277.7	28683.4	108233	44257.5
105	N-trimethyllysine	Yes	N-trimethyllysine			C9H21N2O2+	positive	189.16	MXNRLFUSFKVQSK-QMMMGPOBSA-O	1	1	1	3	Level 1+				perfect match to internal reference library	31651184	20180925_AK-JS_Wildermuth_Environments3_Brachy_QE139_Ag683775-924-USHXG01163_POS_MSMS_MSSuc-ster-Brachy-5-423_IR01_058.h5	16.7804	20180925_AK-JS_Wildermuth_Environments3_Brachy_QE139_Ag683775-924-USHXG01163_POS_MSMS_MS-nonster-Brachy-1-426_IR01_028.h5	16.36	6	60.082,84.081,86.097,130.086,144.138,189.159	0.957	[M]+	189.16	189.159	0.0003	1.6608	16.24	16.59	16.78	16.41	0.37	0105_Trimethyllysine_positive_M189p1598_16p78				14911453	979583	3.278e+06	6544114	4820608			982886	825652
4	nicotinamide	Yes	nicotinamide			C6H6N2O	positive	122.048	DFPAKSUCGFBDDF-UHFFFAOYSA-N	0	1	1	2	Level 1				no ref match available or no MSMS collected	1.9656e+06	20180925_AK-JS_Wildermuth_Environments3_Brachy_QE139_Ag683775-924-USHXG01163_POS_MSMS_MS-nonster-Brachy-1-426_IR01_028.h5	1.1882						[M+H]+	123.055	123.055	0.0001	0.4753	1.15	1.39	1.19	1.21	0.02	0004_nicotinamide_positive_M+H123p0553_1p19	81522.4	34535.8	53037.9	1.9656e+06	1.04519e+06	1.27716e+06	1.61419e+06	1.28249e+06	168506	294194	1.27663e+06	1573986
32	nicotinic acid	Yes	nicotinic acid			C6H5NO2	positive	123.032	PVNIIMVLHYAWGP-UHFFFAOYSA-N	0.5	1	1	2.5	Level 1+				partial match of fragments	1.04665e+06	20180925_AK-JS_Wildermuth_Environments3_Brachy_QE139_Ag683775-924-USHXG01163_POS_MSMS_MSSuc-ster-Brachy-3-421_IR01_064.h5	5.1423	20180925_AK-JS_Wildermuth_Environments3_Brachy_QE139_Ag683775-924-USHXG01163_POS_MSMS_MSSuc-ster-TxCtrl-2-425_IR01_073.h5	5.15	3	78.035,96.045,124.039	0.7761	[M+H]+	124.039	124.039	0	0.2507	4.74	5.58	5.14	5.09	0.05	0032_nicotinic_acid_positive_M+H124p0393_5p14	17067.8	12120.7	12319.9	618063	741549	1.02441e+06	597291	315731	63383.1	51588.9	99300.9	49993.4
68	o-acetyl-serine and/or isomers	Yes	o-acetyl-serine			C5H9NO4	positive	147.053	VZXPDPZARILFQX-BYPYZUCNSA-N	0.5	1	1	2.5	Level 1+			multiple, unresolvable peaks	partial match of fragments	1.54639e+06	20180925_AK-JS_Wildermuth_Environments3_Brachy_QE139_Ag683775-924-USHXG01163_POS_MSMS_MS-nonster-Brachy-1-426_IR01_028.h5	10.6708	20180925_AK-JS_Wildermuth_Environments3_Brachy_QE139_Ag683775-924-USHXG01163_POS_MSMS_MS-nonster-Brachy-1-426_IR01_028.h5	10.37	6	60.045,70.029,88.040,102.055,148.078,148.111	0.5613	[M+H]+	148.06	148.06	0.0002	1.4133	10.26	10.95	10.67	10.52	0.15	0068_O-acetyl-L-serine_positive_M+H148p0605_10p67				1.54639e+06	70525.5	302881	501918	197067			24836.4	51005.9
0	omega-hydroxydodecanoic acid	Yes	omega-hydroxydodecanoic acid			C12H24O3	negative	216.173	ZDHCZVWCTKTBRY-UHFFFAOYSA-N	0	1	1	2	Level 1				no ref match available or no MSMS collected	3.46824e+06	20180925_AK-JS_Wildermuth_Environments3_Brachy_QE139_Ag683775-924-USHXG01163_NEG_MSMS_MS-ster-TxCtrl-2-418_IR02_050.h5	1.04535						[M-H]-	215.165	215.165	0.0002	0.9729	1.02	1.23	1.05	1.08	0.04	0000_12-Hydroxydodecanoic_acid_negative_M-H215p1652_1p05	21611.2			285276	818000	485920	386331	300753	2.67176e+06	3.29654e+06	211981	135049
101	ornithine	Yes	ornithine			C5H12N2O2	negative	132.09	AHLPHDHHMVZTML-BYPYZUCNSA-N	0	1	1	2	Level 1				no ref match available or no MSMS collected	1.10347e+06	20180925_AK-JS_Wildermuth_Environments3_Brachy_QE139_Ag683775-924-USHXG01163_NEG_MSMS_MSSuc-ster-Brachy-5-423_IR02_059.h5	17.0412						[M-H]-	131.083	131.083	0	0.1916	16.44	16.75	17.04	16.63	0.41	0061_L-Pyroglutamic_acid_negative_M-H128p0353_11p07	243323	76537.9	65720.4	3.3272e+06	588682	1344608	3.80098e+06	1216504	38090.7	82717.7	44521.1	80470.1
41	orotic acid	Yes	orotic acid			C5H4N2O4	negative	156.017	PXQPEWDEAKTCGB-UHFFFAOYSA-N	1	1	1	3	Level 1+				perfect match to internal reference library	12935143	20180925_AK-JS_Wildermuth_Environments3_Brachy_QE139_Ag683775-924-USHXG01163_NEG_MSMS_MSSuc-ster-Brachy-5-423_IR02_059.h5	7.19895	20180925_AK-JS_Wildermuth_Environments3_Brachy_QE139_Ag683775-924-USHXG01163_NEG_MSMS_MSSuc-ster-Brachy-5-423_IR02_059.h5	7.5	2	111.020,155.010	0.9793	[M-H]-	155.01	155.01	0	0.0635	7.4	7.6	7.2	7.5	0.3	0029_Octanedioic_acid_negative_M-H173p0819_3p04	44903	9898.52	11259.1	97474.1	252857	200784	175843	157078	561331	597551	88232.9	65342.1
38	pantothenic acid	Yes	pantothenic acid			C9H17NO5	positive	219.111	GHOKWGTUZJEAQD-ZETCQYMHSA-N	1	1	1	3	Level 1+				perfect match to internal reference library	7802980	20180925_AK-JS_Wildermuth_Environments3_Brachy_QE139_Ag683775-924-USHXG01163_POS_MSMS_MS-nonster-Brachy-4-429_IR01_037.h5	6.30753	20180925_AK-JS_Wildermuth_Environments3_Brachy_QE139_Ag683775-924-USHXG01163_POS_MSMS_MS-ster-Brachy-1-412_IR01_022.h5	6.76	21	59.050,67.055,69.071,72.045,73.029,85.065,87.081,90.055,95.049,98.024,100.040,103.076,116.035,124.076,142.086,160.097,166.086,174.112,184.097,202.107,220.118	0.8835	[M+H]+	220.118	220.118	0.0003	1.5551	6.08	6.85	6.31	6.62	0.31	0038_pantothenic_acid_positive_M+H220p1180_6p31	3850.47			5.04544e+06	4980600	4.53108e+06	7802980	6915305	27136.1	126382	2.67201e+06	2.80195e+06
44	phenylalanine	Yes	phenylalanine			C9H11NO2	negative	165.079	COLNVLDHVKWLRT-QMMMGPOBSA-N	1	1	1	3	Level 1+				perfect match to internal reference library	14095663	20180925_AK-JS_Wildermuth_Environments3_Brachy_QE139_Ag683775-924-USHXG01163_NEG_MSMS_MSSuc-ster-Brachy-5-423_IR02_059.h5	8.31913	20180925_AK-JS_Wildermuth_Environments3_Brachy_QE139_Ag683775-924-USHXG01163_NEG_MSMS_MSSuc-ster-Brachy-5-423_IR02_059.h5	8.75	5	72.009,103.056,119.050,147.045,164.072	0.9297	[M-H]-	164.072	164.072	0.0002	1.4148	8.43	9.01	8.32	8.68	0.36	0032_allantoin_negative_M-H157p0367_4p45				257906	53962.5	107749	246159	157663			44890.7	113098
66	pipecolic acid	Yes	pipecolic acid			C6H11NO2	positive	129.079	HXEACLLIILLPRG-YFKPBYRVSA-N	1	1	1	3	Level 1+				perfect match to internal reference library	2.73559e+06	20180925_AK-JS_Wildermuth_Environments3_Brachy_QE139_Ag683775-924-USHXG01163_POS_MSMS_MS-nonster-Brachy-1-426_IR01_028.h5	10.3484	20180925_AK-JS_Wildermuth_Environments3_Brachy_QE139_Ag683775-924-USHXG01163_POS_MSMS_MS-nonster-Brachy-1-426_IR01_028.h5	10.31	3	56.050,84.081,130.086	0.796	[M+H]+	130.086	130.086	0.0001	0.8935	10.23	10.87	10.35	10.42	0.07	0066_l-Pipecolic_acid_positive_M+H130p0863_10p35	14342.5	17667.7	19837.7	2.73559e+06	217131	441344	897392	235040	25741.6	25273.9	86488.9	48654.1
65	proline	Yes	proline			C5H9NO2	positive	115.063	ONIBWKKTOPOVIA-BYPYZUCNSA-N	1	1	1	3	Level 1+				perfect match to internal reference library	211298352	20180925_AK-JS_Wildermuth_Environments3_Brachy_QE139_Ag683775-924-USHXG01163_POS_MSMS_MS-nonster-Brachy-1-426_IR01_028.h5	10.2973	20180925_AK-JS_Wildermuth_Environments3_Brachy_QE139_Ag683775-924-USHXG01163_POS_MSMS_MS-ster-TxCtrl-1-417_IR01_070.h5	10.09	2	70.066,116.071	0.9864	[M+H]+	116.071	116.071	0.0001	0.6546	9.98	10.45	10.3	10.24	0.05	0065_L-proline_positive_M+H116p0706_10p30	22828.5	25298	24152.4	211298352	8101770	36946820	14201321	11815200	183851	932345	4.41523e+06	515119
60	pyridoxamine	Yes	pyridoxamine			C8H12N2O2	positive	168.09	NHZMQXZHNVQTQA-UHFFFAOYSA-N	0	1	1	2	Level 1				no ref match available or no MSMS collected	1.10617e+06	20180925_AK-JS_Wildermuth_Environments3_Brachy_QE139_Ag683775-924-USHXG01163_POS_MSMS_MSSuc-ster-Brachy-5-423_IR01_058.h5	9.45906						[M+H]+	169.097	169.097	0.0003	1.5422	9.21	9.65	9.46	9.38	0.08	0060_pyridoxamine_positive_M+H169p0972_9p46	11743.6	12951.6	12717	428812	270905	261038	1.03896e+06	520834	22084.7	27330.4	100531	136507
11	pyridoxine	Yes	pyridoxine			C8H11NO3	positive	169.074	LXNHXLLTXMVWPM-UHFFFAOYSA-N	1	1	1	3	Level 1+				perfect match to internal reference library	62706168	20180925_AK-JS_Wildermuth_Environments3_Brachy_QE139_Ag683775-924-USHXG01163_POS_MSMS_MSSuc-ster-Brachy-5-423_IR01_058.h5	1.97647	20180925_AK-JS_Wildermuth_Environments3_Brachy_QE139_Ag683775-924-USHXG01163_POS_MSMS_MSSuc-ster-Brachy-5-423_IR01_058.h5	1.95	4	124.076,134.060,152.071,170.081	0.9395	[M+H]+	170.081	170.081	0.0003	1.645	1.71	2.22	1.98	1.87	0.11	0011_pyridoxine_positive_M+H170p0812_1p98	53362.5	22528.9	26475.8	5230231	1.91351e+06	3.3601e+06	2.92978e+06	3.21807e+06	122427	139830	1.9328e+06	1.84207e+06
67	quinic acid	Yes	quinic acid			C7H12O6	negative	192.063	AAWZDTNXLSGCEK-LNVDRNJUSA-N	1	1	1	3	Level 1+				perfect match to internal reference library	3.36256e+06	20180925_AK-JS_Wildermuth_Environments3_Brachy_QE139_Ag683775-924-USHXG01163_NEG_MSMS_MS-nonster-Brachy-1-426_IR02_029.h5	12.6809	20180925_AK-JS_Wildermuth_Environments3_Brachy_QE139_Ag683775-924-USHXG01163_NEG_MSMS_MSSuc-ster-TxCtrl-2-425_IR02_074.h5	12.47	4	85.029,93.034,127.041,191.056	0.8823	[M-H]-	191.056	191.056	0	0.0982	12.31	12.79	12.68	12.64	0.04	0046_D-Sorbitol_negative_M+Cl217p0484_8p51	9442.34	7805.86		24623564	19369528	19216344	19398050	17966440	92471	89068.5	19220026	16880820
25	riboflavin	Yes	riboflavin			C17H20N4O6	positive	376.138	AUNGANRZJHBGPY-SCRDCRAPSA-N	0	1	1	2	Level 1				no ref match available or no MSMS collected	487213	20180925_AK-JS_Wildermuth_Environments3_Brachy_QE139_Ag683775-924-USHXG01163_POS_MSMS_MS-ster-TxCtrl-1-417_IR01_070.h5	4.10285						[M+H]+	377.146	377.145	0.0006	1.4729	4.34	4.71	4.1	4.45	0.34	0025_riboflavin_positive_M+H377p1456_4p10				37610.3	29008.2	26637	179945	63493.9			157402	69297.4
88	serine	Yes	serine			C3H7NO3	positive	105.043	MTCFGRXMJLQNBG-REOHCLBHSA-N	1	1	1	3	Level 1+				perfect match to internal reference library	2099014	20180925_AK-JS_Wildermuth_Environments3_Brachy_QE139_Ag683775-924-USHXG01163_POS_MSMS_MS-nonster-Brachy-1-426_IR01_028.h5	13.9423	20180925_AK-JS_Wildermuth_Environments3_Brachy_QE139_Ag683775-924-USHXG01163_POS_MSMS_MS-nonster-Brachy-1-426_IR01_028.h5	13.95	4	60.045,70.029,88.040,106.050	0.9202	[M+H]+	106.05	106.05	0.0002	1.4855	13.86	14.51	13.94	14.19	0.25	0088_L-serine_positive_M+H106p0499_13p94	17476.8	24480		2099014	535143	926583	1.51253e+06	1074309		31467.5	222115	348015
95	sn-glycero-3-phosphocholine	Yes	sn-glycero-3-phosphocholine			C8H21NO6P+	positive	258.11	SUHOQUVVVLNYQR-MRVPVSSYSA-O	1	1	1	3	Level 1+				perfect match to internal reference library	82714320	20180925_AK-JS_Wildermuth_Environments3_Brachy_QE139_Ag683775-924-USHXG01163_POS_MSMS_MS-nonster-Brachy-4-429_IR01_037.h5	14.6177	20180925_AK-JS_Wildermuth_Environments3_Brachy_QE139_Ag683775-924-USHXG01163_POS_MSMS_MSSuc-ster-Brachy-3-421_IR01_064.h5	14.91	6	60.082,86.097,104.107,125.000,184.073,258.110	0.9435	[M]+	258.11	258.11	0.0005	1.8951	14.62	15.07	14.62	14.83	0.21	0095_Glycerophosphocholine_positive_M258p1101_14p62				34033216	17340412	27716114	82714320	31767820			15865690	16551663
1	sorbic acid	Yes	sorbic acid			C6H8O2	negative	112.052	WSWCOQWTEOXDQX-MQQKCMAXSA-N	0	1	1	2	Level 1				no ref match available or no MSMS collected	379683	20180925_AK-JS_Wildermuth_Environments3_Brachy_QE139_Ag683775-924-USHXG01163_NEG_MSMS_MS-nonster-TxCtrl-2-432_IR02_056.h5	1.07343						[M-H]-	111.045	111.045	0	0.3811	1.08	1.26	1.07	1.16	0.08	0001_sorbic_acid_negative_M-H111p0451_1p07	7751.25		8575.06	85352.5	150222	113446	80759.2	73199.7	318067	379683	57478.8	43775.9
29	suberic acid	Yes	suberic acid			C8H14O4	negative	174.089	TYFQFVWCELRYAO-UHFFFAOYSA-N	1	1	1	3	Level 1+				co-isolated precursor but all reference ions are in sample spectrum	597551	20180925_AK-JS_Wildermuth_Environments3_Brachy_QE139_Ag683775-924-USHXG01163_NEG_MSMS_MS-nonster-TxCtrl-2-432_IR02_056.h5	3.0392	20180925_AK-JS_Wildermuth_Environments3_Brachy_QE139_Ag683775-924-USHXG01163_NEG_MSMS_MS-nonster-TxCtrl-2-432_IR02_056.h5	3.08	4	83.050,111.082,129.092,173.082	0.812	[M-H]-	173.082	173.082	0.0002	1.2889	2.89	3.41	3.04	3.14	0.1	0022_4-Pyridoxic_acid_negative_M-H182p0459_2p60				2.26918e+06	1.42494e+06	1.33628e+06	2.01236e+06	2.41415e+06	16959.6	20636.8	749931	1.15593e+06
10	syringic acid and/or isomers	Yes	syringic acid			C9H10O5	negative	198.053	JMSVCTWVEWCHDZ-UHFFFAOYSA-N	0	1	1	2	Level 1			multiple, unresolvable peaks	no ref match available or no MSMS collected	456009	20180925_AK-JS_Wildermuth_Environments3_Brachy_QE139_Ag683775-924-USHXG01163_NEG_MSMS_MS-ster-Brachy-3-414_IR02_068.h5	1.51203						[M-H]-	197.046	197.045	0.0001	0.4871	1.47	1.82	1.51	1.63	0.12	0009_thymidine_negative_M-H241p0830_1p51	6320.63			1.19753e+06	1.40355e+06	677939	742365	955733	6749.71		321654	347889
64	taurine	Yes	taurine			C2H7NO3S	negative	125.015	XOAAWQZATWQOTB-UHFFFAOYSA-N	0	1	1	2	Level 1				no ref match available or no MSMS collected	107121	20180925_AK-JS_Wildermuth_Environments3_Brachy_QE139_Ag683775-924-USHXG01163_NEG_MSMS_MS-ster-TxCtrl-2-418_IR02_050.h5	11.6002						[M-H]-	124.007	124.007	0	0.0696	11.3	11.62	11.6	11.48	0.12	0043_guanosine_negative_M-H282p0844_7p91				155668160	41644192	58930972	76483456	99610856	135072	1626146	58653632	62150972
104	tetrasaccharide (ex. stachyose)	Yes	stachyose			C24H42O21	positive	666.222	UQZIYBXSHAGNOE-XNSRJBNMSA-N	1	1	0.5	2.5	Level 1+			multiple nearby peaks	perfect match to internal reference library	18546588	20180925_AK-JS_Wildermuth_Environments3_Brachy_QE139_Ag683775-924-USHXG01163_POS_MSMS_MSSuc-ster-Brachy-3-421_IR01_064.h5	16.6402	20180925_AK-JS_Wildermuth_Environments3_Brachy_QE139_Ag683775-924-USHXG01163_POS_MSMS_MSSuc-ster-Brachy-1-419_IR01_061.h5	15.91	7	185.042,203.052,347.094,365.105,509.147,527.157,689.209	0.7622	[M+Na]+	689.211	689.209	0.0018	2.6058	15.9	16.05	16.64	16	0.64	0104_Stachyose_positive_M+Na689p2111_16p64				53832.5			29929.5	26815.6			25841.6	17199.1
78	threonine/allothreonine/homoserine	Yes	threonine	allothreonine//homoserine//threonine	AYFVYJQAPQTCCC-HRFVKAFMSA-N//UKAUYVFTDYCKQA-VKHMYHEASA-N//AYFVYJQAPQTCCC-GBXIJSLDSA-N	C4H9NO3	positive	119.058	AYFVYJQAPQTCCC-GBXIJSLDSA-N	1	1	1	3	Level 1+			multiple, unresolvable peaks	perfect match to internal reference library	11097262	20180925_AK-JS_Wildermuth_Environments3_Brachy_QE139_Ag683775-924-USHXG01163_POS_MSMS_MS-nonster-Brachy-1-426_IR01_028.h5	13.0346	20180925_AK-JS_Wildermuth_Environments3_Brachy_QE139_Ag683775-924-USHXG01163_POS_MSMS_MS-nonster-Brachy-3-428_IR01_025.h5	12.97	9	56.050,57.034,58.066,74.061,84.045,96.995,102.055,120.011,120.065	0.9221	[M+H]+	120.066	120.066	0	0.2086	12.85	13.84	13.03	13.25	0.22	0078_L-threonine_positive_M+H120p0655_13p03	46282.6	47821.2	38113.8	11097262	1.02063e+06	10266978	3.10384e+06	1.48088e+06	66666.2	113955	311238	219737
9	thymidine	Yes	thymidine			C10H14N2O5	negative	242.09	IQFYYKKMVGJFEH-XLPZGREQSA-N	1	1	1	3	Level 1+				co-isolated precursor but all reference ions are in sample spectrum	1.40355e+06	20180925_AK-JS_Wildermuth_Environments3_Brachy_QE139_Ag683775-924-USHXG01163_NEG_MSMS_MS-nonster-Brachy-2-427_IR02_011.h5	1.50836	20180925_AK-JS_Wildermuth_Environments3_Brachy_QE139_Ag683775-924-USHXG01163_NEG_MSMS_MS-nonster-Brachy-2-427_IR02_011.h5	1.53	2	151.051,241.083	0.8843	[M-H]-	241.083	241.083	0	0.1245	1.4	1.76	1.51	1.56	0.05	0008_Vanillic_acid_negative_M-H167p0350_1p47				359617	584762	320164	261612	284921	18817.8	42193.5	265050	312512
5	thymine	Yes	thymine			C5H6N2O2	positive	126.043	RWQNBRDOKXIBIV-UHFFFAOYSA-N	0.5	1	1	2.5	Level 1+				partial match of fragments	9198153	20180925_AK-JS_Wildermuth_Environments3_Brachy_QE139_Ag683775-924-USHXG01163_POS_MSMS_MS-ster-TxCtrl-1-417_IR01_070.h5	1.21642	20180925_AK-JS_Wildermuth_Environments3_Brachy_QE139_Ag683775-924-USHXG01163_POS_MSMS_MS-ster-Brachy-5-416_IR01_013.h5	1.21	7	54.035,56.050,81.045,82.029,84.045,109.040,127.050	0.5187	[M+H]+	127.05	127.05	0.0001	0.8152	1.17	1.35	1.22	1.2	0.01	0005_thymine_positive_M+H127p0502_1p22	23550	34247.5	19341	3.10192e+06	2.70369e+06	1.53722e+06	2.40851e+06	1.32634e+06	602119	912408	5886075	2.68753e+06
3	trans-cinnamic acid	Yes	trans-cinnamic acid			C9H8O2	negative	148.052	WBYWAXJHAXSJNI-VOTSOKGWSA-N	1	1	1	3	Level 1+				perfect match to internal reference library	1.39984e+06	20180925_AK-JS_Wildermuth_Environments3_Brachy_QE139_Ag683775-924-USHXG01163_NEG_MSMS_MS-nonster-Brachy-1-426_IR02_029.h5	1.12272	20180925_AK-JS_Wildermuth_Environments3_Brachy_QE139_Ag683775-924-USHXG01163_NEG_MSMS_MS-nonster-Brachy-1-426_IR02_029.h5	1.13	3	61.988,119.050,147.045	0.6153	[M-H]-	147.045	147.045	0.0001	0.4575	1.04	1.26	1.12	1.15	0.03	0003_CINNAMIC_ACID_negative_M-H147p0451_1p12				1.39984e+06	576984	677734	777559	865334	15673.7	22359.5	95600.4	83000.4
52	trigonelline	Yes	trigonelline			C7H8NO2+	positive	138.055	WWNNZCOKKKDOPX-UHFFFAOYSA-O	1	1	1	3	Level 1+				perfect match to internal reference library	9945252	20180925_AK-JS_Wildermuth_Environments3_Brachy_QE139_Ag683775-924-USHXG01163_POS_MSMS_MS-nonster-Brachy-1-426_IR01_028.h5	8.1149	20180925_AK-JS_Wildermuth_Environments3_Brachy_QE139_Ag683775-924-USHXG01163_POS_MSMS_MSSuc-ster-TxCtrl-2-425_IR01_073.h5	7.91	3	94.065,110.060,138.055	0.9156	[M]+	138.055	138.055	0.0002	1.1944	7.77	8.27	8.11	7.99	0.12	0052_3-carboxy-1-methylpyridinium_positive_M138p0550_8p11	13934.5	21358.2	24017.8	9945252	4.15257e+06	6.10213e+06	7.4541e+06	7.59922e+06	190936	286763	3.92434e+06	3045095
91	trisaccharide (ex. raffinose)	Yes	raffinose			C18H32O16	negative	504.169	MUPFEKGTMRGPLJ-ZQSKZDJDSA-N	1	1	1	3	Level 1+			multiple nearby peaks	perfect match to internal reference library	181435952	20180925_AK-JS_Wildermuth_Environments3_Brachy_QE139_Ag683775-924-USHXG01163_NEG_MSMS_MSSuc-ster-Brachy-3-421_IR02_065.h5	15.3108	20180925_AK-JS_Wildermuth_Environments3_Brachy_QE139_Ag683775-924-USHXG01163_NEG_MSMS_MSSuc-ster-TxCtrl-1-424_IR02_044.h5	15.3	23	58.005,59.013,71.013,72.993,73.029,83.014,85.029,87.009,89.024,101.025,113.025,119.035,125.024,131.036,143.035,149.046,161.046,179.056,221.067,281.088,323.098,341.109,503.162	0.865	[M-H]-	503.162	503.162	0.0003	0.6044	15.25	15.45	15.31	15.38	0.06	0057_L-proline_negative_M-H114p0560_10p30	4445.34		3392.49	15785402	424385	2.33829e+06	676608	647199	9640.55	45469.7	232410	23367.8
61	tryptophan	Yes	tryptophan			C11H12N2O2	positive	204.09	QIVBCDIJIAJPQS-SECBINFHSA-N	1	1	1	3	Level 1+				perfect match to internal reference library	1.83581e+06	20180925_AK-JS_Wildermuth_Environments3_Brachy_QE139_Ag683775-924-USHXG01163_POS_MSMS_MSSuc-ster-Brachy-5-423_IR01_058.h5	9.51128	20180925_AK-JS_Wildermuth_Environments3_Brachy_QE139_Ag683775-924-USHXG01163_POS_MSMS_MSSuc-ster-Brachy-5-423_IR01_058.h5	9.85	9	118.065,132.081,142.065,144.081,146.060,159.091,170.060,188.071,205.096	0.7792	[M+H]+	205.097	205.097	0.0003	1.5549	9.7	10.08	9.51	9.85	0.34	0061_D-Tryptophan_positive_M+H205p0972_9p51				1.04285e+06	253992	486540	883196	577307	4534.02	25414.6	84816.5	82943.8
43	tyramine	Yes	tyramine			C8H11NO	positive	137.084	DZGWFCGJZKJUFP-UHFFFAOYSA-N	1	1	1	3	Level 1+				perfect match to internal reference library	10746095	20180925_AK-JS_Wildermuth_Environments3_Brachy_QE139_Ag683775-924-USHXG01163_POS_MSMS_MS-nonster-Brachy-5-430_IR01_019.h5	6.38367	20180925_AK-JS_Wildermuth_Environments3_Brachy_QE139_Ag683775-924-USHXG01163_POS_MSMS_MS-nonster-Brachy-5-430_IR01_019.h5	6.1	3	93.070,103.055,121.065	0.8656	[M+H]+	138.091	138.091	0.0002	1.7155	6.01	6.48	6.38	6.21	0.17	0043_tyramine_positive_M+H138p0914_6p38	38657.7	41316.6	51173.6	4905220	3.25157e+06	2.46908e+06	9949517	10746095	70362.5	77742.1	788553	887188
69	tyrosine	Yes	tyrosine			C9H11NO3	positive	181.074	OUYCCCASQSFEME-QMMMGPOBSA-N	1	1	1	3	Level 1+				perfect match to internal reference library	1.80563e+06	20180925_AK-JS_Wildermuth_Environments3_Brachy_QE139_Ag683775-924-USHXG01163_POS_MSMS_MS-nonster-Brachy-1-426_IR01_028.h5	11.2551	20180925_AK-JS_Wildermuth_Environments3_Brachy_QE139_Ag683775-924-USHXG01163_POS_MSMS_MS-nonster-Brachy-1-426_IR01_028.h5	11.33	11	91.055,95.050,98.975,116.986,119.049,121.065,123.044,136.076,147.044,165.054,182.082	0.8534	[M+H]+	182.081	182.081	0.0003	1.4945	11.24	11.66	11.26	11.42	0.16	0069_L-tyrosine_positive_M+H182p0812_11p26		6758.93	5512.03	1.80563e+06	286345	737563	828017	554545	16198.5	88272.8	318354	69124.9
6	uracil	Yes	uracil			C4H4N2O2	negative	112.027	ISAKRJDGNUQOIC-UHFFFAOYSA-N	1	1	1	3	Level 1+				perfect match to internal reference library	3393234	20180925_AK-JS_Wildermuth_Environments3_Brachy_QE139_Ag683775-924-USHXG01163_NEG_MSMS_MS-nonster-Brachy-2-427_IR02_011.h5	1.33065	20180925_AK-JS_Wildermuth_Environments3_Brachy_QE139_Ag683775-924-USHXG01163_NEG_MSMS_MS-nonster-Brachy-1-426_IR02_029.h5	1.37	2	110.976,111.020	0.9484	[M-H]-	111.02	111.02	0	0.0111	1.26	1.56	1.33	1.38	0.04	0006_uracil_negative_M-H111p0200_1p33	8154.11	5179.14		1.9434e+06	3393234	981706	1.0965e+06	3.32916e+06	15695.3	84782	266272	166643
23	uridine	Yes	uridine			C9H12N2O6	negative	244.07	DRTQHJPVMGBUCF-XVFCMESISA-N	1	1	1	3	Level 1+				perfect match to internal reference library	24512798	20180925_AK-JS_Wildermuth_Environments3_Brachy_QE139_Ag683775-924-USHXG01163_NEG_MSMS_MS-nonster-Brachy-1-426_IR02_029.h5	2.61438	20180925_AK-JS_Wildermuth_Environments3_Brachy_QE139_Ag683775-924-USHXG01163_NEG_MSMS_MS-ster-Brachy-5-416_IR02_014.h5	2.73	12	66.034,82.030,96.045,110.025,111.020,122.025,124.040,140.036,152.036,153.031,200.057,243.062	0.9099	[M-H]-	243.062	243.062	0	0.0982	2.48	3.12	2.61	2.73	0.11	0018_Citraconic_acid_negative_M-H129p0193_2p04	12258	10934.3	12145.8	150772	102563	61291	71069.1	48922.3	17133.4	22074.6	38904.1	41063.1
90	uronic acid	Yes	galacturonic acid	galacturonic acid//glucuronic acid	AEMOLEFTQBMNLQ-DTEWXJGMSA-N//AEMOLEFTQBMNLQ-AQKNRBDQSA-N	C6H10O7	negative	194.043	AEMOLEFTQBMNLQ-DTEWXJGMSA-N	1	1	1	3	Level 1+				perfect match to internal reference library	10969852	20180925_AK-JS_Wildermuth_Environments3_Brachy_QE139_Ag683775-924-USHXG01163_NEG_MSMS_MSSuc-ster-Brachy-3-421_IR02_065.h5	15.2748	20180925_AK-JS_Wildermuth_Environments3_Brachy_QE139_Ag683775-924-USHXG01163_NEG_MSMS_MSSuc-ster-Brachy-3-421_IR02_065.h5	15.34	22	57.034,58.005,59.013,71.014,72.993,73.029,75.009,83.014,85.029,87.009,89.024,95.014,99.009,101.025,103.004,113.025,129.019,131.035,133.014,157.014,175.025,193.035	0.8526	[M-H]-	193.035	193.035	0.0001	0.6494	14.71	16.02	15.27	15.32	0.04	0072_L-threonine_negative_M-H118p0509_13p04	103200	39278.6	33918.5	8767351	1.29209e+06	4290731	3.4753e+06	1.62991e+06	16606.2	58328.4	213943	179194
67	valine	Yes	valine			C5H11NO2	positive	117.079	KZSNJWFQEVHDMF-BYPYZUCNSA-N	1	1	1	3	Level 1+				perfect match to internal reference library	28336264	20180925_AK-JS_Wildermuth_Environments3_Brachy_QE139_Ag683775-924-USHXG01163_POS_MSMS_MS-nonster-Brachy-1-426_IR01_028.h5	10.4479	20180925_AK-JS_Wildermuth_Environments3_Brachy_QE139_Ag683775-924-USHXG01163_POS_MSMS_MSSuc-ster-Brachy-5-423_IR01_058.h5	10.46	6	55.055,57.058,58.066,59.074,72.082,118.086	0.9185	[M+H]+	118.086	118.086	0.0001	0.4678	10.33	10.94	10.45	10.48	0.04	0067_L-valine_positive_M+H118p0863_10p45	1.55632e+06	1.70867e+06	1.79032e+06	28336264	7384913	13302957	23068392	10421273	2.10822e+06	2.0847e+06	2.57746e+06	2.58397e+06
8	vanillic acid	Yes	vanillic acid			C8H8O4	negative	168.042	WKOLLVMJNQIZCI-UHFFFAOYSA-N	0	1	1	2	Level 1				no ref match available or no MSMS collected	584762	20180925_AK-JS_Wildermuth_Environments3_Brachy_QE139_Ag683775-924-USHXG01163_NEG_MSMS_MS-nonster-Brachy-2-427_IR02_011.h5	1.46904						[M-H]-	167.035	167.035	0.0002	1.0287	1.47	1.71	1.47	1.57	0.1	0007_p-coumaric_acid_negative_M-H163p0400_1p44	17685.1			9166486	16828458	8804320	9769920	18301318	24294.5	44683.1	1.77016e+06	2.89155e+06
21	xanthine	Yes	xanthine			C5H4N4O2	negative	152.033	LRFVTYWOQMYALW-UHFFFAOYSA-N	1	1	1	3	Level 1+				perfect match to internal reference library	98692616	20180925_AK-JS_Wildermuth_Environments3_Brachy_QE139_Ag683775-924-USHXG01163_NEG_MSMS_MS-ster-TxCtrl-1-417_IR02_071.h5	2.47169	20180925_AK-JS_Wildermuth_Environments3_Brachy_QE139_Ag683775-924-USHXG01163_NEG_MSMS_MS-ster-Brachy-1-412_IR02_023.h5	2.77	3	108.021,126.032,151.026	0.9623	[M-H]-	151.026	151.026	0	0.2783	2.38	3.22	2.47	2.63	0.16	0016_4-hydroxyphenylacetic_acid_negative_M-H151p0400_1p98	20284.4	7126.85	10248.9	29365	43291.1	32780.5	49326.6	35470.8	27791.6	23831.8	96347.1	25743.4
53	xanthosine	Yes	xanthosine			C10H12N4O6	negative	284.076	UBORTCNDUKBEOP-UUOKFMHZSA-N	0	1	1	2	Level 1				no ref match available or no MSMS collected	297413	20180925_AK-JS_Wildermuth_Environments3_Brachy_QE139_Ag683775-924-USHXG01163_NEG_MSMS_MSSuc-ster-Brachy-5-423_IR02_059.h5	9.12868						[M-H]-	283.068	283.068	0.0002	0.5483	9	9.28	9.13	9.05	0.08	0034_L-Lactic_acid_negative_M-H89p0244_4p56	178172	44382.1	64490.6	12034554	19443642	12301660	8750946	14137307	132295	3.53582e+06	1522901	599243
	red: excluded due to low signal in samples compared to blanks
[truncated: 12 more columns]

## Sheet: Diurnal Tissues
COMPOUND ANNOTATION										COMPOUND IDENTIFICATION SCORES									MS1 INTENSITY INFORMATION			MSMS INFORMATION				MSMS EVALUATION	ION INFORMATION			M/Z EVALUATION		CHROMATOGRAPHIC PEAK INFORMATION				RT EVALUATION		Group	ExCtrl	ExCtrl	ExCtrl	ExCtrl	ExCtrl	ExCtrl	ExCtrl	ExCtrl	root-EOD-Arabidopsis	root-EOD-Arabidopsis	root-EOD-Arabidopsis
Compound #	Identified Metabolite	Use for peak height comparisons?	Name of metabolite searched for	Labels of Overlapping Compounds	Inchi Keys of Overlapping Compounds	Molecular Formula	Polarity	Exact Mass	Inchi Key	MSMS Score (0 to 1)	m/z score (0 to 1)	RT score (0 to 1)	Total ID Score (0 to 3)	Mass Spec Inititative Identification Level	Isomer details	Identification notes	MS1 notes	MS2 notes	Maximum MS1 intensity across all files	Filename w/ maximum MS1	Retention time of max intensity MS1 peak	File with highest MSMS match score	RT of highest matched MSMS scan	Number of ion matches in msms spectra to EMA reference spectra	List of ion matches in msms spectra to EMA reference spectra		Adduct	Theoretical m/z	Measured m/z	mass error (delta Da)	mass error (delta ppm)	Minimum retention time (min)	Maximum retention time (max)	Theoretical retention time (peak)	Detected RT (peak)	RT error (absolute delta)	Identified Metabolite	Sample	NA-NA-ExCtrl-1-459-3-R	NA-NA-ExCtrl-1-459-3-S	NA-NA-ExCtrl-2-459-4-R	NA-NA-ExCtrl-2-459-4-S	NA-NA-ExCtrl-3-460-3-R	NA-NA-ExCtrl-3-460-3-S	NA-NA-ExCtrl-4-460-4-R	NA-NA-ExCtrl-4-460-4-S	root-EOD-Arabidopsis-1-451-3-R	root-EOD-Arabidopsis-2-452-3-R	root-EOD-Arabidopsis-3-453-3-R
Unique for study	Some isomers are not chromatographically or spectrally resolvable.		Name of standard reference compound in library match.	compound with similar mz (abs difference <= 0.005) or monoisotopic molecular weight (abs difference <= 0.005) and RT (min or max within the RT-min-max-range of similar compound)	List of inchi keys that correspond to the compounds listed in the previous column			monoisotopic mass (neutral except for permanently charged molecules)	neutralized version	1 (MSMS matches ref. std.), 0.5 (possible match), 0 (no MSMS collected or no appropriate ref available), -1 (bad match)	Cutoff of 20PPM used for negative polarity mode and 10PPM used for positive polarity mode, any outliners from m/z vs ppm correlation were removed from results. All delta m/z < 0.002 (NOTE: neg mass accuracy is not as good as pos) mz_quality	1 (delta RT </= 0.5), 0.5 (delta RT > 0.5 & </= 2), 0 (delta RT > 2 min)	sum of m/z, RT and MSMS score	Level 1 = Two independent and orthogonal properties match authentic standard; else = putative [Metabolomics. 2007 Sep; 3(3): 211-221. doi: 10.1007/s11306-007-0082-2]	Isomers have same formula (and m/z) and similar RT - MSMS spectra may be used to differentiate (exceptions) or RT elution order									mean # of fragment ions matching between compound in sample and reference compound / standard; may include parent and isotope ions and very low intensity background ions (these do not contribute to score)		MSMS score (highest across all samples), scale of 0 to 1 based on an algorithm. 0 = no match, 1 = perfect match. If no score, then no MSMS was acquired for that compound (@ m/z & RT window).	More than one may be detectable; the one evaluated is listed	theoretical m/z for a given compound / adduct pair	average m/z within 20ppm of theoretical detected across all samples @ RT peak	absolute difference between theoretical and detected m/z	ppm difference between theoretical and detected m/z	Retention range including start and end of detection of an m/z value (Note: Peak Height is calculated as the highest intensity of an m/z within the min/max RT range. Peak Area is calculated as the integrated area under the curve for an m/z within the mix/max RT range.)		theoretical retention time for a compound based upon reference standard at highest intensity point of peak	average retention time for a detected compound at highest intensity point of peak across all samples	absolute difference between theoretical and detected RT peak		neg file	20180730_MV_JS_Wildermuth_Diurnal3_20180627ts_QE144_Ag683775-924_USHXG01062_NEG_MSMS-v2_NA-NA-ExCtrl-1-459-3-R_IR02__288.h5	20180730_MV_JS_Wildermuth_Diurnal3_20180627ts_QE144_Ag683775-924_USHXG01062_NEG_MSMS-v2_NA-NA-ExCtrl-1-459-3-S_IR02__032.h5	20180730_MV_JS_Wildermuth_Diurnal3_20180627ts_QE144_Ag683775-924_USHXG01062_NEG_MSMS-v2_NA-NA-ExCtrl-2-459-4-R_IR02_rerun_352.h5	20180730_MV_JS_Wildermuth_Diurnal3_20180627ts_QE144_Ag683775-924_USHXG01062_NEG_MSMS-v2_NA-NA-ExCtrl-2-459-4-S_IR02_rerun_243.h5	20180730_MV_JS_Wildermuth_Diurnal3_20180627ts_QE144_Ag683775-924_USHXG01062_NEG_MSMS-v2_NA-NA-ExCtrl-3-460-3-R_IR02__050.h5	20180730_MV_JS_Wildermuth_Diurnal3_20180627ts_QE144_Ag683775-924_USHXG01062_NEG_MSMS-v2_NA-NA-ExCtrl-3-460-3-S_IR02__267.h5	20180730_MV_JS_Wildermuth_Diurnal3_20180627ts_QE144_Ag683775-924_USHXG01062_NEG_MSMS-v2_NA-NA-ExCtrl-4-460-4-R_IR02__110.h5	20180730_MV_JS_Wildermuth_Diurnal3_20180627ts_QE144_Ag683775-924_USHXG01062_NEG_MSMS-v2_NA-NA-ExCtrl-4-460-4-S_IR02_rerun_340.h5	20180730_MV_JS_Wildermuth_Diurnal3_20180627ts_QE144_Ag683775-924_USHXG01062_NEG_MSMS-v2_root-EOD-Arabidopsis-1-451-3-R_IR02__092.h5	20180730_MV_JS_Wildermuth_Diurnal3_20180627ts_QE144_Ag683775-924_USHXG01062_NEG_MSMS-v2_root-EOD-Arabidopsis-2-452-3-R_IR02_rerun_246.h5	20180730_MV_JS_Wildermuth_Diurnal3_20180627ts_QE144_Ag683775-924_USHXG01062_NEG_MSMS-v2_root-EOD-Arabidopsis-3-453-3-R_IR02_rerun_355.h5
index	identified_metabolite		label	overlapping_compound	overlapping_inchi_keys	formula	polarity	exact_mass	inchi_key	msms_quality	mz_quality	rt_quality	total_score	msi_level	isomer_details	identification_notes	ms1_notes	ms2_notes	max_intensity	max_intensity_file	ms1_rt_peak	msms_file	msms_rt	msms_numberofions	msms_matchingions	msms_score	mz_adduct	mz_theoretical	mz_measured	mz_error	mz_ppmerror	rt_min	rt_max	rt_theoretical	rt_measured	rt_error		Pos file	20180730_MV_JS_Wildermuth_Diurnal3_20180627ts_QE144_Ag683775-924_USHXG01062_POS_MSMS-v2_NA-NA-ExCtrl-1-459-3-R_IR01__287.h5	20180730_MV_JS_Wildermuth_Diurnal3_20180627ts_QE144_Ag683775-924_USHXG01062_POS_MSMS-v2_NA-NA-ExCtrl-1-459-3-S_IR01__031.h5	20180730_MV_JS_Wildermuth_Diurnal3_20180627ts_QE144_Ag683775-924_USHXG01062_POS_MSMS-v2_NA-NA-ExCtrl-2-459-4-R_IR01_rerun_351.h5	20180730_MV_JS_Wildermuth_Diurnal3_20180627ts_QE144_Ag683775-924_USHXG01062_POS_MSMS-v2_NA-NA-ExCtrl-2-459-4-S_IR01_rerun_242.h5	20180730_MV_JS_Wildermuth_Diurnal3_20180627ts_QE144_Ag683775-924_USHXG01062_POS_MSMS-v2_NA-NA-ExCtrl-3-460-3-R_IR01__049.h5	20180730_MV_JS_Wildermuth_Diurnal3_20180627ts_QE144_Ag683775-924_USHXG01062_POS_MSMS-v2_NA-NA-ExCtrl-3-460-3-S_IR01__266.h5	20180730_MV_JS_Wildermuth_Diurnal3_20180627ts_QE144_Ag683775-924_USHXG01062_POS_MSMS-v2_NA-NA-ExCtrl-4-460-4-R_IR01__109.h5	20180730_MV_JS_Wildermuth_Diurnal3_20180627ts_QE144_Ag683775-924_USHXG01062_POS_MSMS-v2_NA-NA-ExCtrl-4-460-4-S_IR01_rerun_339.h5	20180730_MV_JS_Wildermuth_Diurnal3_20180627ts_QE144_Ag683775-924_USHXG01062_POS_MSMS-v2_root-EOD-Arabidopsis-1-451-3-R_IR01__091.h5	20180730_MV_JS_Wildermuth_Diurnal3_20180627ts_QE144_Ag683775-924_USHXG01062_POS_MSMS-v2_root-EOD-Arabidopsis-2-452-3-R_IR01_rerun_245.h5	20180730_MV_JS_Wildermuth_Diurnal3_20180627ts_QE144_Ag683775-924_USHXG01062_POS_MSMS-v2_root-EOD-Arabidopsis-3-453-3-R_IR01_rerun_354.h5
40	1-methyl-6,7-dihydroxy-1,2,3,4-tetrahydroisoquinoline	yes	1-methyl-6,7-dihydroxy-1,2,3,4-tetrahydroisoquinoline			C10H13NO2	positive	179.095	IBRKLUSXDYATLG-LURJTMIESA-N	1	1	1	3	Level 1+				perfect match to internal reference library	102188584	20180730_MV_JS_Wildermuth_Diurnal3_20180627ts_QE144_Ag683775-924_USHXG01062_POS_MSMS-v2_root-EON-Arabidopsis-6-456-4-R_IR01_rerun_191.h5	8.11001	20180730_MV_JS_Wildermuth_Diurnal3_20180627ts_QE144_Ag683775-924_USHXG01062_POS_MSMS-v2_root-EOD-Brachy-2-434-3-R_IR01__281.h5	8.35	6	117.070,137.060,145.065,151.075,163.075,180.102	0.8997	[M+H]+	180.102	180.101	0.0005	2.818	8.15	8.55	8.11	8.3	0.19	1-methyl-6,7-dihydroxy-1,2,3,4-tetrahydroisoquinoline	0000_lumichrome_negative_M-H241p0731_1p16	0	0	0	0	0	0	0	0	1.31526e+06	1.61427e+06	1.20981e+06
66	2-amino-2-methylpropanoic acid	yes	2-amino-2-methylpropanoic acid			C4H9NO2	negative	103.063	FUOOLUPWFVMBKG-UHFFFAOYSA-N	1	1	1	3	Level 1+				co-isolated precursor but all reference ions are in sample spectrum	1.04779e+06	20180730_MV_JS_Wildermuth_Diurnal3_20180627ts_QE144_Ag683775-924_USHXG01062_NEG_MSMS-v2_shoot-EOD-Brachy-3-436-3-S_IR02__285.h5	12.2699	20180730_MV_JS_Wildermuth_Diurnal3_20180627ts_QE144_Ag683775-924_USHXG01062_NEG_MSMS-v2_shoot-EOD-Brachy-3-436-3-S_IR02__285.h5	12.37	1	102.055	0	[M-H]-	102.056	102.055	0.0015	14.5662	12.22	12.55	12.27	12.37	0.1	2-amino-2-methylpropanoic acid	0001_5-Hydroxyindole-3-acetic_acid_negative_M-H190p0509_1p21	0	0	0	0	0	0	0	11018.8	51093.3	71697	0
120	2-phosphoglyceric acid	yes	2-phosphoglyceric acid			C3H7O7P	negative	185.993	GXIURPTVHJPJLF-UWTATZPHSA-N	1	1	1	3	Level 1+				perfect match to internal reference library	2.57835e+06	20180730_MV_JS_Wildermuth_Diurnal3_20180627ts_QE144_Ag683775-924_USHXG01062_NEG_MSMS-v2_shoot-EOD-Brachy-3-436-3-S_IR02__285.h5	16.9219	20180730_MV_JS_Wildermuth_Diurnal3_20180627ts_QE144_Ag683775-924_USHXG01062_NEG_MSMS-v2_shoot-EOD-Brachy-6-439-3-S_IR02__107.h5	16.99	3	78.958,96.968,184.985	0.8594	[M-H]-	184.986	184.985	0.001	5.1675	16.91	17.16	16.92	17.04	0.12	2-phosphoglyceric acid	0002_thymine_negative_M-H125p0356_1p24	0	0	13062.2	0	0	0	0	0	0	0	0
9	2'-deoxyadenosine	yes	2'-deoxyadenosine	2'-deoxyadenosine//5'-deoxyadenosine	OLXZPDWKRNYJJZ-RRKCRQDMSA-N//XGYIMTFOTBMPFP-KQYNXXCUSA-N	C10H13N5O3	positive	251.102	OLXZPDWKRNYJJZ-RRKCRQDMSA-N	1	1	1	3	Level 1+				perfect match to internal reference library	192478992	20180730_MV_JS_Wildermuth_Diurnal3_20180627ts_QE144_Ag683775-924_USHXG01062_POS_MSMS-v2_shoot-EOD-Brachy-2-434-3-S_IR01__040.h5	2.20288	20180730_MV_JS_Wildermuth_Diurnal3_20180627ts_QE144_Ag683775-924_USHXG01062_POS_MSMS-v2_shoot-EOD-Brachy-6-439-3-S_IR01__106.h5	2.32	3	117.055,136.062,252.109	0.9121	[M+H]+	252.109	252.108	0.0007	2.9165	2.13	2.45	2.2	2.3	0.09	2'-deoxyadenosine	0003_ferulic_acid_negative_M-H193p0506_1p29	44888	24549.1	27991.5	47225.8	20951	59583	25749.3	33846.6	473182	581846	330847
31	2'-deoxyguanosine	yes	2'-deoxyguanosine			C10H13N5O4	positive	267.097	YKBGVTZYEHREMT-KVQBGUIXSA-N	1	1	1	3	Level 1+				perfect match to internal reference library	5.86173e+06	20180730_MV_JS_Wildermuth_Diurnal3_20180627ts_QE144_Ag683775-924_USHXG01062_POS_MSMS-v2_shoot-EON-Brachy-3-436-4-S_IR01_rerun_239.h5	6.81326	20180730_MV_JS_Wildermuth_Diurnal3_20180627ts_QE144_Ag683775-924_USHXG01062_POS_MSMS-v2_shoot-EOD-Brachy-4-437-3-S_IR01__028.h5	6.89	2	117.055,152.057	0.9405	[M+H]+	268.104	268.103	0.0007	2.6814	6.68	7.02	6.81	6.84	0.02	2'-deoxyguanosine	0004_uracil_negative_M-H111p0200_1p37	38945.7	0	14891.7	35527.7	0	23456.4	7930.75	21651.9	117108	159876	213204
53	2',3'-cyclic AMP	yes	2',3'-cyclic AMP			C10H12N5O6P	positive	329.053	KMYWVDDIPVNLME-KQYNXXCUSA-N	1	1	1	3	Level 1+				perfect match to internal reference library	22166712	20180730_MV_JS_Wildermuth_Diurnal3_20180627ts_QE144_Ag683775-924_USHXG01062_POS_MSMS-v2_shoot-EOD-Brachy-2-434-3-S_IR01__040.h5	10.5464	20180730_MV_JS_Wildermuth_Diurnal3_20180627ts_QE144_Ag683775-924_USHXG01062_POS_MSMS-v2_shoot-EON-Brachy-1-433-4-S_IR01__064.h5	10.8	2	136.062,330.060	0.9344	[M+H]+	330.06	330.059	0.0006	1.8369	10.53	10.91	10.55	10.7	0.15	2',3'-cyclic AMP	0005_indole-3-acetic_acid_negative_M-H174p0560_1p45	0	0	0	0	0	0	0	0	36456.5	27935.9	25757.7
60	3-dehydroshikimic acid and or isomers	yes	3-dehydroshikimic acid			C7H8O5	negative	172.037	SLWWJZMPHJJOPH-PHDIDXHHSA-N	1	1	1	3	Level 1+			multiple, unresolvable peaks	co-isolated precursor but all reference ions are in sample spectrum	5313489	20180730_MV_JS_Wildermuth_Diurnal3_20180627ts_QE144_Ag683775-924_USHXG01062_NEG_MSMS-v2_shoot-EOD-Brachy-2-434-3-S_IR02__041.h5	11.3097	20180730_MV_JS_Wildermuth_Diurnal3_20180627ts_QE144_Ag683775-924_USHXG01062_NEG_MSMS-v2_shoot-EON-Brachy-1-433-4-S_IR02__065.h5	11.16	12	65.038,67.017,69.033,71.012,81.033,99.044,108.020,109.028,111.008,127.039,143.034,171.029	0.8541	[M-H]-	171.03	171.029	0.0012	7.0855	10.95	11.39	11.31	11.14	0.17	3-dehydroshikimic acid and or isomers	0006_p-coumaric_acid_negative_M-H163p0400_1p50	27160.6	9261.95	23999.3	26286.7	17415.6	24967.7	14591.8	24855.9	2.42709e+06	1.93576e+06	2690731
10	3-hydroxyanthranilic acid	yes	3-hydroxyanthranilic acid			C7H7NO3	negative	153.043	WJXSWCUQABXPFS-UHFFFAOYSA-N	0.5	1	1	2.5	Level 1+				partial match of fragments	1.76921e+06	20180730_MV_JS_Wildermuth_Diurnal3_20180627ts_QE144_Ag683775-924_USHXG01062_NEG_MSMS-v2_shoot-EON-Brachy-2-434-4-S_IR02__068.h5	1.843	20180730_MV_JS_Wildermuth_Diurnal3_20180627ts_QE144_Ag683775-924_USHXG01062_NEG_MSMS-v2_shoot-EON-Brachy-2-434-4-S_IR02__068.h5	2.25	2	108.044,152.034	0.6742	[M-H]-	152.035	152.034	0.0009	5.8199	1.9	2.6	1.84	2.12	0.27	3-hydroxyanthranilic acid	0007_Vanillic_acid_negative_M-H167p0350_1p53	25591.4	12426	18695	20951.2	9535.32	20966.3	23044.1	17427.2	96896.1	164067	99329.4
28	isomer of 3-methoxy-4-hydroxymandelic acid	yes	3-methoxy-4-hydroxymandelic acid			C9H10O5	negative	198.053	CGQCWMIAEPEHNQ-QMMMGPOBSA-N	0	1	0.5	1.5	NA			poor match, possible isomer	no ref match available or no MSMS collected	2.05933e+06	20180730_MV_JS_Wildermuth_Diurnal3_20180627ts_QE144_Ag683775-924_USHXG01062_NEG_MSMS-v2_shoot-EON-Brachy-5-438-4-S_IR02_rerun_234.h5	6.08699						[M-H]-	197.046	197.045	0.0009	4.5718	6.3	6.91	6.09	6.61	0.52	3-methoxy-4-hydroxymandelic acid	0008_SYRINGIC_ACID_negative_M-H197p0455_1p59	11392.5	0	10374.8	14790	9541.82	0	0	0	24889.6	28771.5	21570.2
29	3-methoxytyramine and or isomers	yes	3-methoxytyramine			C9H13NO2	positive	167.095	DIVQKHQLANKJQO-UHFFFAOYSA-N	1	1	1	3	Level 1+			multiple, unresolvable peaks	perfect match to internal reference library	210076592	20180730_MV_JS_Wildermuth_Diurnal3_20180627ts_QE144_Ag683775-924_USHXG01062_POS_MSMS-v2_root-EON-Arabidopsis-6-456-4-R_IR01_rerun_191.h5	6.22326	20180730_MV_JS_Wildermuth_Diurnal3_20180627ts_QE144_Ag683775-924_USHXG01062_POS_MSMS-v2_root-EON-Brachy-1-433-4-R_IR01__013.h5	6.62	8	91.055,95.049,119.049,123.080,136.052,137.060,151.075,168.069	0.8115	[M+H]+	168.102	168.101	0.0004	2.4213	5.84	6.97	6.22	6.67	0.45	3-methoxytyramine and or isomers	0009_2-Hydroxycinnamic_acid_negative_M-H163p0400_1p61	27160.6	9261.95	23999.3	26286.7	17415.6	24967.7	14591.8	24855.9	2.42709e+06	1.93576e+06	2690731
51	3-methyglutaric acid	yes	3-methyglutaric acid			C6H10O4	negative	146.058	XJMMNTGIMDZPMU-UHFFFAOYSA-N	1	1	1	3	Level 1+				co-isolated precursor but all reference ions are in sample spectrum	1.934e+06	20180730_MV_JS_Wildermuth_Diurnal3_20180627ts_QE144_Ag683775-924_USHXG01062_NEG_MSMS-v2_shoot-EON-Arabidopsis-4-454-4-S_IR02_rerun_195.h5	9.80124	20180730_MV_JS_Wildermuth_Diurnal3_20180627ts_QE144_Ag683775-924_USHXG01062_NEG_MSMS-v2_shoot-EON-Arabidopsis-4-454-4-S_IR02_rerun_195.h5	9.6	3	83.049,101.059,145.049	0.4649	[M-H]-	145.051	145.049	0.0011	7.7302	9.47	9.79	9.8	9.63	0.18	3-methyglutaric acid	0010_2-Amino-3-hydroxybenzoic_acid_negative_M-H152p0353_1p84	23969.7	23386.9	14969.7	20960.5	21495.9	29496.5	22282.5	15869.8	310725	254143	136652
64	3-methyl-histidine	yes	3-methyl-histidine			C7H11N3O2	positive	169.085	JDHILDINMRGULE-LURJTMIESA-N	0	1	1	2	Level 1				no ref match available or no MSMS collected	1.72529e+06	20180730_MV_JS_Wildermuth_Diurnal3_20180627ts_QE144_Ag683775-924_USHXG01062_POS_MSMS-v2_shoot-EON-Brachy-2-434-4-S_IR01__067.h5	13.1702						[M+H]+	170.092	170.092	0.0003	1.9002	13.26	13.59	13.17	13.42	0.25	3-methyl-histidine	0011_azelaic_acid_negative_M-H187p0976_2p11	148978	31968.8	75036	160458	67742.2	108674	50692.9	77680.2	365973	851963	323900
13	4-acetamidobutanoic acid	yes	4-acetamidobutanoic acid			C6H11NO3	positive	145.074	UZTFMUBKZQVKLK-UHFFFAOYSA-N	0	1	1	2	Level 1				no ref match available or no MSMS collected	3183537	20180730_MV_JS_Wildermuth_Diurnal3_20180627ts_QE144_Ag683775-924_USHXG01062_POS_MSMS-v2_shoot-EON-Brachy-2-434-4-S_IR01__067.h5	2.97221						[M+H]+	146.081	146.081	0.0003	1.897	2.77	3.33	2.97	3.08	0.11	4-acetamidobutanoic acid	0012_Salicylate_negative_M-H137p0244_2p17	63212.5	40882.1	75021.5	174287	94486.5	74491.3	57992.9	89956.7	2.43378e+06	3.27359e+06	4.12246e+06
86	4-aminobutanoic acid	yes	4-aminobutanoic acid			C4H9NO2	negative	103.063	BTCSSZJGUNDROE-UHFFFAOYSA-N	1	1	1	3	Level 1+				co-isolated precursor but all reference ions are in sample spectrum	44331800	20180730_MV_JS_Wildermuth_Diurnal3_20180627ts_QE144_Ag683775-924_USHXG01062_NEG_MSMS-v2_shoot-EON-Brachy-5-438-4-S_IR02_rerun_234.h5	14.2148	20180730_MV_JS_Wildermuth_Diurnal3_20180627ts_QE144_Ag683775-924_USHXG01062_NEG_MSMS-v2_root-EON-Arabidopsis-6-456-4-R_IR02_rerun_192.h5	14.38	2	84.044,102.055	0.9248	[M-H]-	102.056	102.055	0.0015	14.5586	14.31	14.5	14.21	14.41	0.19	4-aminobutanoic acid	0013_adenine_negative_M-H134p0472_2p48	38574	21388.9	22032.3	43071.2	22056.6	49570	27872.3	20794.6	85131568	71443584	80230216
73	4-guanidinobutanoic acid	yes	4-guanidinobutanoic acid			C5H11N3O2	positive	145.085	TUHVEAJXIMEOSA-UHFFFAOYSA-N	1	1	1	3	Level 1+				perfect match to internal reference library	373959424	20180730_MV_JS_Wildermuth_Diurnal3_20180627ts_QE144_Ag683775-924_USHXG01062_POS_MSMS-v2_shoot-EON-Brachy-5-438-4-S_IR01_rerun_233.h5	13.7244	20180730_MV_JS_Wildermuth_Diurnal3_20180627ts_QE144_Ag683775-924_USHXG01062_POS_MSMS-v2_shoot-EON-Brachy-6-439-4-S_IR01__293.h5	13.88	9	60.056,69.034,86.061,87.045,104.071,111.055,128.082,129.066,146.093	0.9581	[M+H]+	146.092	146.092	0.0003	1.7995	13.81	14.16	13.72	13.92	0.2	4-guanidinobutanoic acid	0014_xanthine_negative_M-H151p0261_2p69	132726	14621.9	35473.9	33171	37776.6	31264.7	9913.09	16598.3	296445	470624	380304
40	4-hydroxy-2-quinolinecarboxylic acid	yes	4-hydroxy-2-quinolinecarboxylic acid			C10H7NO3	negative	189.043	HCZHHEIFKROPDY-UHFFFAOYSA-N	0.5	1	1	2.5	Level 1+				partial match of fragments	6931320	20180730_MV_JS_Wildermuth_Diurnal3_20180627ts_QE144_Ag683775-924_USHXG01062_NEG_MSMS-v2_shoot-EOD-Medicago-2-442-3b-S_IR02_rerun_207.h5	8.02454	20180730_MV_JS_Wildermuth_Diurnal3_20180627ts_QE144_Ag683775-924_USHXG01062_NEG_MSMS-v2_shoot-EOD-Arabidopsis-4-454-3-S_IR02__074.h5	8.03	2	144.044,188.033	0.3529	[M-H]-	188.035	188.034	0.0009	4.858	7.77	8.25	8.02	8	0.02	4-hydroxy-2-quinolinecarboxylic acid	0015_4-Pyridoxic_acid_negative_M-H182p0459_2p83	11788.8	9123.51	9309.39	0	7341.42	0	0	0	1282603	4979888	1.99596e+06
63	4-hydroxyproline	yes	trans-4-hydroxyproline	cis-4-hydroxy-proline//trans-4-hydroxyproline	PMMYEEVYMWASQN-QWWZWVQMSA-N//PMMYEEVYMWASQN-DMTCNVIQSA-N	C5H9NO3	positive	131.058	PMMYEEVYMWASQN-DMTCNVIQSA-N	1	1	1	3	Level 1+	cis and trans isomers unresolvable			perfect match to internal reference library	49742640	20180730_MV_JS_Wildermuth_Diurnal3_20180627ts_QE144_Ag683775-924_USHXG01062_POS_MSMS-v2_shoot-EOD-Brachy-5-438-3-S_IR01_rerun_348.h5	13.1075	20180730_MV_JS_Wildermuth_Diurnal3_20180627ts_QE144_Ag683775-924_USHXG01062_POS_MSMS-v2_shoot-EOD-Brachy-5-438-3-S_IR01_rerun_348.h5	13.19	3	68.050,86.061,132.066	0.9267	[M+H]+	132.065	132.065	0.0003	1.9941	13.12	13.35	13.11	13.23	0.13	4-hydroxyproline	0016_uridine_negative_M-H243p0622_2p85	21838.5	10871.8	11682.2	19354.2	9701.01	18498.3	8468.5	0	11693233	13121648	10829582
69	4-imidazoleacetic acid	yes	4-imidazoleacetic acid			C5H6N2O2	positive	126.043	PRJKNHOMHKJCEJ-UHFFFAOYSA-N	1	1	1	3	Level 1+				perfect match to internal reference library	24604454	20180730_MV_JS_Wildermuth_Diurnal3_20180627ts_QE144_Ag683775-924_USHXG01062_POS_MSMS-v2_shoot-EON-Brachy-5-438-4-S_IR01_rerun_233.h5	13.4751	20180730_MV_JS_Wildermuth_Diurnal3_20180627ts_QE144_Ag683775-924_USHXG01062_POS_MSMS-v2_shoot-EOD-Brachy-5-438-3-S_IR01_rerun_348.h5	13.55	2	81.045,127.050	0.9035	[M+H]+	127.05	127.05	0.0001	1.1527	13.48	13.72	13.48	13.6	0.12	4-imidazoleacetic acid	0017_adenosine_negative_M-H266p0895_3p04	14045.8	0	11117.1	15208.2	0	13723.3	8503.3	0	111230	67757.3	154004
15	4-pyridoxic acid	yes	4-pyridoxic acid			C8H9NO4	negative	183.053	HXACOUQIXZGNBF-UHFFFAOYSA-N	1	1	0.5	2.5	Level 1+				perfect match to internal reference library	38460036	20180730_MV_JS_Wildermuth_Diurnal3_20180627ts_QE144_Ag683775-924_USHXG01062_NEG_MSMS-v2_shoot-EON-Brachy-5-438-4-S_IR02_rerun_234.h5	2.83216	20180730_MV_JS_Wildermuth_Diurnal3_20180627ts_QE144_Ag683775-924_USHXG01062_NEG_MSMS-v2_shoot-EOD-Brachy-5-438-3-S_IR02_rerun_349.h5	3.41	3	108.044,138.055,182.045	0.881	[M-H]-	182.046	182.045	0.001	5.6894	3.22	3.81	2.83	3.49	0.66	4-pyridoxic acid	0018_adenosine_negative_M+acetate326p1107_3p05	19062.6	0	10664.3	22657.8	0	0	8422.48	0	110272	110895	501347
1	5-hydroxyindoleacetic acid	yes	5-hydroxyindoleacetic acid			C10H9NO3	negative	191.058	DUUGKQCEGZLZNO-UHFFFAOYSA-N	0	1	1	2	Level 1				no ref match available or no MSMS collected	3.75994e+06	20180730_MV_JS_Wildermuth_Diurnal3_20180627ts_QE144_Ag683775-924_USHXG01062_NEG_MSMS-v2_root-EON-Arabidopsis-6-456-4-R_IR02_rerun_192.h5	1.21488						[M-H]-	190.051	190.05	0.001	5.4174	1.12	1.28	1.21	1.18	0.04	5-hydroxyindoleacetic acid	0019_Caffeicacid_negative_M-H179p0350_3p26	19785.6	13879	18959	20361.9	10048.7	22366.1	11843.4	14505.9	565339	319284	455565
18	5-methylcytosine	yes	5-methylcytosine			C5H7N3O	positive	125.059	LRSASMSXMSNRBT-UHFFFAOYSA-N	1	1	1	3	Level 1+				perfect match to internal reference library	1.74055e+06	20180730_MV_JS_Wildermuth_Diurnal3_20180627ts_QE144_Ag683775-924_USHXG01062_POS_MSMS-v2_root-EON-Medicago-2-444-4b-R_IR01__082.h5	4.35199	20180730_MV_JS_Wildermuth_Diurnal3_20180627ts_QE144_Ag683775-924_USHXG01062_POS_MSMS-v2_shoot-EON-Medicago-3-444-4c-S_IR01_rerun_203.h5	4.37	5	81.045,83.061,108.056,109.040,126.066	0.9016	[M+H]+	126.066	126.066	0.0003	2.0844	4.27	4.55	4.35	4.4	0.05	5-methylcytosine	0020_DL-Mevalonate_negative_M-H147p0663_4p82	12064.3	6421.09	8358.59	11076.4	6359.71	9745.83	6711.37	9169.58	44029.6	67469.1	112833
62	5-oxo-proline and/or isomers	yes	5-oxo-proline			C5H7NO3	negative	129.043	ODHCTXKNWHHXJC-VKHMYHEASA-N	1	1	1	3	Level 1+			multiple, unresolvable peaks	perfect match to internal reference library	136972064	20180730_MV_JS_Wildermuth_Diurnal3_20180627ts_QE144_Ag683775-924_USHXG01062_NEG_MSMS-v2_root-EOD-Arabidopsis-2-452-3-R_IR02_rerun_246.h5	11.5284	20180730_MV_JS_Wildermuth_Diurnal3_20180627ts_QE144_Ag683775-924_USHXG01062_NEG_MSMS-v2_root-EOD-Arabidopsis-5-455-3-R_IR02_rerun_210.h5	11.48	2	82.029,128.034	0.9878	[M-H]-	128.035	128.034	0.0013	10.185	11.36	11.82	11.53	11.54	0.01	5-oxo-proline and/or isomers	0021_malonic_acid_negative_M-H103p0037_4p84	6816.6	0	5417.87	0	0	0	0	0	179953	381046	337015
4	5'-methylthioadenosine	yes	5'-methylthioadenosine			C11H15N5O3S	positive	297.09	WUUGFSXJNOTRMR-IOSLPCCCSA-N	1	1	1	3	Level 1+				perfect match to internal reference library	88056296	20180730_MV_JS_Wildermuth_Diurnal3_20180627ts_QE144_Ag683775-924_USHXG01062_POS_MSMS-v2_shoot-EON-Brachy-2-434-4-S_IR01__067.h5	1.6126	20180730_MV_JS_Wildermuth_Diurnal3_20180627ts_QE144_Ag683775-924_USHXG01062_POS_MSMS-v2_root-EON-Arabidopsis-1-451-4-R_IR01__076.h5	1.63	6	61.011,75.027,136.062,145.032,163.042,298.096	0.9231	[M+H]+	298.097	298.096	0.0008	2.6047	1.56	1.75	1.61	1.64	0.02	5'-methylthioadenosine	0022_allantoin_negative_M-H157p0367_4p89	23394.1	8559.33	49457.7	38834.2	0	29989.4	5939.54	0	2.83737e+06	8.01815e+06	3.69797e+06
10	adenine	yes	adenine			C5H5N5	positive	135.054	GFFGJBXGBJISGV-UHFFFAOYSA-N	1	1	1	3	Level 1+				perfect match to internal reference library	1817902208	20180730_MV_JS_Wildermuth_Diurnal3_20180627ts_QE144_Ag683775-924_USHXG01062_POS_MSMS-v2_root-EOD-Arabidopsis-6-456-3-R_IR01_rerun_257.h5	2.51885	20180730_MV_JS_Wildermuth_Diurnal3_20180627ts_QE144_Ag683775-924_USHXG01062_POS_MSMS-v2_shoot-EOD-Medicago-4-449-3a-S_IR01__100.h5	2.78	4	94.040,119.035,136.062,137.046	0.9518	[M+H]+	136.062	136.061	0.0003	2.4941	2.43	2.93	2.52	2.68	0.16	adenine	0023_glyceraldehyde_negative_M-H89p0244_4p98	753365	15426.4	722427	963770	37644.6	1.12216e+06	35733.5	845113	705643	6.457e+06	3.4906e+06
14	adenosine	yes	adenosine			C10H13N5O4	positive	267.097	OIRDTQYFTABQOQ-KQYNXXCUSA-N	1	1	1	3	Level 1+				perfect match to internal reference library	2032779648	20180730_MV_JS_Wildermuth_Diurnal3_20180627ts_QE144_Ag683775-924_USHXG01062_POS_MSMS-v2_shoot-EOD-Brachy-2-434-3-S_IR01__040.h5	3.02174	20180730_MV_JS_Wildermuth_Diurnal3_20180627ts_QE144_Ag683775-924_USHXG01062_POS_MSMS-v2_root-EOD-Arabidopsis-3-453-3-R_IR01_rerun_354.h5	3.07	2	136.062,268.104	0.9879	[M+H]+	268.104	268.103	0.0007	2.759	2.69	3.31	3.02	3.07	0.05	adenosine	0024_L-Lactic_acid_negative_M-H89p0244_5p01	753365	15426.4	722427	963770	37644.6	1.12216e+06	35733.5	845113	705643	6.457e+06	3.4906e+06
85	adenosine 5'-monophosphoric acid	yes	adenosine 5'-monophosphoric acid			C10H14N5O7P	positive	347.063	UDMBCSSLTHHNCD-KQYNXXCUSA-N	1	1	1	3	Level 1+				perfect match to internal reference library	16147703	20180730_MV_JS_Wildermuth_Diurnal3_20180627ts_QE144_Ag683775-924_USHXG01062_POS_MSMS-v2_shoot-EOD-Arabidopsis-6-456-3-S_IR01__034.h5	15.1601	20180730_MV_JS_Wildermuth_Diurnal3_20180627ts_QE144_Ag683775-924_USHXG01062_POS_MSMS-v2_shoot-EOD-Arabidopsis-6-456-3-S_IR01__034.h5	14.87	2	136.062,348.070	0.8927	[M+H]+	348.07	348.07	0.0006	1.6849	14.83	15.36	15.16	14.92	0.24	adenosine 5'-monophosphoric acid	0025_inosine_negative_M-H267p0735_5p37	12643.4	7722.52	9073.16	0	8249.35	11342.9	6744.12	0	19261.4	76834.1	153992
101	agmatine sulfuric acid	yes	agmatine sulfuric acid			C5H14N4	positive	130.122	QYPPJABKJHAVHS-UHFFFAOYSA-N	1	1	1	3	Level 1+				perfect match to internal reference library	1009661056	20180730_MV_JS_Wildermuth_Diurnal3_20180627ts_QE144_Ag683775-924_USHXG01062_POS_MSMS-v2_shoot-EON-Medicago-2-444-4b-S_IR01_rerun_212.h5	16.9631	20180730_MV_JS_Wildermuth_Diurnal3_20180627ts_QE144_Ag683775-924_USHXG01062_POS_MSMS-v2_root-EON-Arabidopsis-5-455-4-R_IR01__022.h5	17.09	4	60.056,72.081,114.103,131.129	0.9426	[M+H]+	131.129	131.129	0.0003	1.9891	17.03	17.12	16.96	17.08	0.11	agmatine sulfuric acid	0026_nicotinic_acid_negative_M-H122p0247_5p57	42139.8	23071.4	37230.2	46196.2	16748.4	35680.3	18408.8	34928.7	269662	727166	743587
71	alanine	yes	alanine			C3H7NO2	negative	89.0477	QNAYBMKLOCPYGJ-REOHCLBHSA-N	1	1	1	3	Level 1+				perfect match to internal reference library	98250560	20180730_MV_JS_Wildermuth_Diurnal3_20180627ts_QE144_Ag683775-924_USHXG01062_NEG_MSMS-v2_shoot-EON-Brachy-3-436-4-S_IR02_rerun_240.h5	13.2625	20180730_MV_JS_Wildermuth_Diurnal3_20180627ts_QE144_Ag683775-924_USHXG01062_NEG_MSMS-v2_root-EOD-Arabidopsis-1-451-3-R_IR02__092.h5	13.35	1	88.039	0	[M-H]-	88.0404	88.0389	0.0015	17.0299	13.26	13.5	13.26	13.36	0.1	alanine	0027_ISONICOTINIC_ACID_negative_M-H122p0247_5p91	42139.8	23071.4	37230.2	46196.2	16748.4	35680.3	18408.8	34928.7	269662	727166	743587
22	allantoin	yes	allantoin			C4H6N4O3	negative	158.044	POJWUDADGALRAB-UHFFFAOYSA-N	1	1	1	3	Level 1+				perfect match to internal reference library	86537912	20180730_MV_JS_Wildermuth_Diurnal3_20180627ts_QE144_Ag683775-924_USHXG01062_NEG_MSMS-v2_root-EOD-Brachy-6-439-3-R_IR02_rerun_198.h5	4.88682	20180730_MV_JS_Wildermuth_Diurnal3_20180627ts_QE144_Ag683775-924_USHXG01062_NEG_MSMS-v2_shoot-EOD-Brachy-1-433-3-S_IR02__056.h5	4.62	5	71.024,97.003,114.029,140.009,157.034	0.9292	[M-H]-	157.037	157.036	0.0011	7.2708	4.44	4.83	4.89	4.65	0.24	allantoin	0028_T9EAH8NHTC_negative_M-H197p0455_6p09	15558.2	8962.04	8577.18	12979.2	10395.5	0	11179.4	0	104409	163654	94383.4
88	alpha-aminoadipic acid	yes	alpha-aminoadipic acid			C6H11NO4	positive	161.069	OYIFNHCXNCRBQI-BYPYZUCNSA-N	1	1	1	3	Level 1+				perfect match to internal reference library	17929616	20180730_MV_JS_Wildermuth_Diurnal3_20180627ts_QE144_Ag683775-924_USHXG01062_POS_MSMS-v2_shoot-EOD-Brachy-3-436-3-S_IR01__284.h5	15.7064	20180730_MV_JS_Wildermuth_Diurnal3_20180627ts_QE144_Ag683775-924_USHXG01062_POS_MSMS-v2_root-EOD-Arabidopsis-4-454-3-R_IR01__010.h5	15.83	3	98.060,116.071,144.066	0.9021	[M+H]+	162.076	162.076	0.0003	1.9007	15.76	15.91	15.71	15.84	0.13	alpha-aminoadipic acid	0029_Pyruvic_acid_negative_M-H87p0087_6p14	16904.2	7131.98	17812.5	14147.2	6232.96	14086	8159.23	18819.7	200261	740019	1.23964e+06
96	arginine	yes	arginine			C6H14N4O2	positive	174.112	ODKSFYDXXFIFQN-BYPYZUCNSA-N	1	1	1	3	Level 1+				perfect match to internal reference library	1862527104	20180730_MV_JS_Wildermuth_Diurnal3_20180627ts_QE144_Ag683775-924_USHXG01062_POS_MSMS-v2_shoot-EOD-Arabidopsis-5-455-3-S_IR01_rerun_251.h5	16.7557	20180730_MV_JS_Wildermuth_Diurnal3_20180627ts_QE144_Ag683775-924_USHXG01062_POS_MSMS-v2_shoot-EON-Brachy-6-439-4-S_IR01__293.h5	16.88	11	60.057,70.066,72.082,112.087,114.103,115.087,116.071,130.098,157.109,158.093,175.119	0.9401	[M+H]+	175.119	175.119	0.0004	2.3927	16.84	16.93	16.76	16.89	0.13	arginine	0030_guanine_negative_M-H150p0421_6p20	18313.5	0	13119	9330.43	0	10455	0	8751.54	6.2374e+06	12137130	10746559
87	asparagine	yes	asparagine			C4H8N2O3	negative	132.053	DCXYFEDJOCDNAF-REOHCLBHSA-N	1	1	1	3	Level 1+				perfect match to internal reference library	1455084672	20180730_MV_JS_Wildermuth_Diurnal3_20180627ts_QE144_Ag683775-924_USHXG01062_NEG_MSMS-v2_shoot-EON-Medicago-2-444-4b-S_IR02_rerun_213.h5	14.2157	20180730_MV_JS_Wildermuth_Diurnal3_20180627ts_QE144_Ag683775-924_USHXG01062_NEG_MSMS-v2_root-EOD-Medicago-3-444-3a-R_IR02_rerun_201.h5	14.19	9	70.028,71.024,72.008,86.023,95.024,111.019,113.034,114.018,131.045	0.8945	[M-H]-	131.046	131.045	0.0014	10.3036	14.18	14.5	14.22	14.31	0.1	asparagine	0031_alpha-GalNAc_negative_M-H220p0826_6p30	0	0	0	0	0	0	0	0	49860	142926	115907
108	aspartic acid	yes	aspartic acid			C4H7NO4	negative	133.038	CKLJMWTZIZZHCS-REOHCLBHSA-N	1	1	1	3	Level 1+				perfect match to internal reference library	329525568	20180730_MV_JS_Wildermuth_Diurnal3_20180627ts_QE144_Ag683775-924_USHXG01062_NEG_MSMS-v2_shoot-EON-Brachy-5-438-4-S_IR02_rerun_234.h5	15.9601	20180730_MV_JS_Wildermuth_Diurnal3_20180627ts_QE144_Ag683775-924_USHXG01062_NEG_MSMS-v2_shoot-EOD-Medicago-4-449-3a-S_IR02__101.h5	16.03	6	71.012,72.008,88.039,114.018,115.002,132.029	0.9163	[M-H]-	132.03	132.029	0.0013	9.66	15.96	16.2	15.96	16.06	0.1	aspartic acid	0032_MALEAMIC_ACID_negative_M-H114p0196_6p35	28334.4	0	18841.2	35931.1	7004.49	16454.8	6690.39	29749.1	32870.6	46583.6	107718
11	azelaic acid	yes	azelaic acid			C9H16O4	negative	188.105	BDJRBEYXGGNYIS-UHFFFAOYSA-N	1	1	1	3	Level 1+				perfect match to internal reference library	8310226	20180730_MV_JS_Wildermuth_Diurnal3_20180627ts_QE144_Ag683775-924_USHXG01062_NEG_MSMS-v2_root-EON-Arabidopsis-6-456-4-R_IR02_rerun_192.h5	2.10896	20180730_MV_JS_Wildermuth_Diurnal3_20180627ts_QE144_Ag683775-924_USHXG01062_NEG_MSMS-v2_shoot-EON-Brachy-3-436-4-S_IR02_rerun_240.h5	2.16	5	97.065,123.081,125.096,169.086,187.097	0.9153	[M-H]-	187.098	187.097	0.001	5.2549	1.67	2.61	2.11	2	0.11	azelaic acid	0033_2deoxyguanosine_negative_M-H266p0895_6p80	18520.8	0	0	18081.7	0	0	10641.5	0	169974	208891	245874
38	betaine	yes	betaine			C5H12NO2+	positive	118.086	KWIUHFFTVRNATP-UHFFFAOYSA-O	1	1	0.5	2.5	Level 1+				perfect match to internal reference library	3925030144	20180730_MV_JS_Wildermuth_Diurnal3_20180627ts_QE144_Ag683775-924_USHXG01062_POS_MSMS-v2_shoot-EON-Brachy-5-438-4-S_IR01_rerun_233.h5	7.83223	20180730_MV_JS_Wildermuth_Diurnal3_20180627ts_QE144_Ag683775-924_USHXG01062_POS_MSMS-v2_root-EOD-Brachy-5-438-3-R_IR01__046.h5	8.88	3	58.066,59.074,118.086	0.9703	[M]+	118.086	118.086	0.0001	0.762	8.02	9	7.83	8.52	0.69	betaine	0034_cytidine_negative_M-H242p0782_6p86	14444.2	0	0	13830.6	0	0	0	0	3.34395e+06	6167034	6.46611e+06
11	biliverdin	yes	biliverdin			C33H34N4O6	positive	582.248	RCNSAJSGRJSBKK-YKSNQIBWSA-N	1	1	1	3	Level 1+				perfect match to internal reference library	4390915	20180730_MV_JS_Wildermuth_Diurnal3_20180627ts_QE144_Ag683775-924_USHXG01062_POS_MSMS-v2_root-EOD-Brachy-1-433-3-R_IR01__061.h5	2.58558	20180730_MV_JS_Wildermuth_Diurnal3_20180627ts_QE144_Ag683775-924_USHXG01062_POS_MSMS-v2_root-EOD-Brachy-1-433-3-R_IR01__061.h5	3.06	22	209.109,225.102,227.118,237.102,238.111,251.118,269.129,271.108,279.111,283.108,284.116,297.123,299.139,402.182,451.211,465.228,495.202,523.235,565.245,566.229,568.231,583.255	0.7035	[M+H]+	583.255	583.254	0.0014	2.3372	2.41	3.63	2.59	3.06	0.48	biliverdin	0035_N-Acetyl-D-Glucosamine_negative_M-H220p0826_6p87	0	0	0	0	0	0	0	0	49860	142926	115907
19	caffeic acid	yes	caffeic acid			C9H8O4	negative	180.042	QAIPRVGONGVQAS-RQOWECAXSA-N	1	1	1	3	Level 1+				perfect match to internal reference library	6.89788e+06	20180730_MV_JS_Wildermuth_Diurnal3_20180627ts_QE144_Ag683775-924_USHXG01062_NEG_MSMS-v2_shoot-EOD-Brachy-2-434-3-S_IR02__041.h5	3.26461	20180730_MV_JS_Wildermuth_Diurnal3_20180627ts_QE144_Ag683775-924_USHXG01062_NEG_MSMS-v2_shoot-EOD-Brachy-2-434-3-S_IR02__041.h5	3.14	2	135.044,179.033	0.8213	[M-H]-	179.035	179.035	0.0001	0.7116	2.76	3.76	3.26	3.35	0.08	caffeic acid	0036_pantothenic_acid_negative_M-H218p1034_6p88	14593.7	0	0	0	7477.17	11884.8	0	0	13007328	21207792	9029943
115	carnosine	yes	carnosine			C9H14N4O3	negative	226.107	CQOVPNPJLQNMDC-ZETCQYMHSA-N	0	1	1	2	Level 1				no ref match available or no MSMS collected	1.1607e+06	20180730_MV_JS_Wildermuth_Diurnal3_20180627ts_QE144_Ag683775-924_USHXG01062_NEG_MSMS-v2_shoot-EOD-Brachy-2-434-3-S_IR02__041.h5	16.7586						[M-H]-	225.099	225.099	0.0006	2.8591	16.84	16.92	16.76	16.88	0.12	carnosine	0037_N-Acetyl-D-Mannosamine_negative_M-H220p0826_6p99	0	0	0	0	0	0	0	0	49860	142926	115907
17	choline and or isomers	yes	choline			C5H14NO+	positive	104.107	OEYIOHPDSNJKLS-UHFFFAOYSA-N	1	1	1	3	Level 1+			multiple, unresolvable peaks	perfect match to internal reference library	4381003776	20180730_MV_JS_Wildermuth_Diurnal3_20180627ts_QE144_Ag683775-924_USHXG01062_POS_MSMS-v2_shoot-EOD-Medicago-2-442-3b-S_IR01_rerun_206.h5	4.10703	20180730_MV_JS_Wildermuth_Diurnal3_20180627ts_QE144_Ag683775-924_USHXG01062_POS_MSMS-v2_root-EOD-Medicago-1-442-3a-R_IR01_rerun_236.h5	3.7	3	58.066,60.082,104.107	0.9796	[M]+	104.107	104.107	0	0.4372	3.37	5.1	4.11	4.6	0.49	choline and or isomers	0038_Orotic_acid_negative_M-H155p0098_7p76	0	0	10978.4	13382.1	0	13239.1	7661.54	7643.04	505553	632912	595421
84	citrulline	yes	citrulline			C6H13N3O3	positive	175.096	RHGKLRLOHDJJDR-BYPYZUCNSA-N	1	1	1	3	Level 1+				perfect match to internal reference library	82337976	20180730_MV_JS_Wildermuth_Diurnal3_20180627ts_QE144_Ag683775-924_USHXG01062_POS_MSMS-v2_shoot-EOD-Arabidopsis-5-455-3-S_IR01_rerun_251.h5	14.9339	20180730_MV_JS_Wildermuth_Diurnal3_20180627ts_QE144_Ag683775-924_USHXG01062_POS_MSMS-v2_shoot-EON-Arabidopsis-6-456-4-S_IR01__070.h5	15.09	8	70.066,113.071,114.055,115.087,116.071,141.066,159.076,176.104	0.9037	[M+H]+	176.103	176.103	0.0003	1.5607	15	15.2	14.93	15.08	0.14	citrulline	0039_TRIMETHYL_GLYCINE_negative_M-2H116p0717_7p82	21610.7	9854.51	17500.7	31298.7	6810.49	14390.7	8329.1	11833.8	431396	275711	90023.8
91	cysteic acid	yes	cysteic acid			C3H7NO5S	negative	169.004	XVOYSCVBGLVSOL-REOHCLBHSA-N	0	1	1	2	Level 1				no ref match available or no MSMS collected	2660969	20180730_MV_JS_Wildermuth_Diurnal3_20180627ts_QE144_Ag683775-924_USHXG01062_NEG_MSMS-v2_shoot-EON-Medicago-2-444-4b-S_IR02_rerun_213.h5	14.3849						[M-H]-	167.997	167.996	0.001	6.2024	14.3	14.48	14.38	14.38	0.01	cysteic acid	0040_kynurenic_acid_negative_M-H188p0353_8p02	29853.5	17899	17129.3	18406.4	9437.44	19056.8	9462.1	13216.6	316544	805109	474555
33	cytidine	yes	cytidine	cytidine//cytidine	UHDGCWIWMRVCDJ-XVFCMESISA-N//UHDGCWIWMRVCDJ-XVFCMESISA-N	C9H13N3O5	positive	243.086	UHDGCWIWMRVCDJ-XVFCMESISA-N	1	1	1	3	Level 1+				perfect match to internal reference library	149524096	20180730_MV_JS_Wildermuth_Diurnal3_20180627ts_QE144_Ag683775-924_USHXG01062_POS_MSMS-v2_shoot-EOD-Brachy-2-434-3-S_IR01__040.h5	6.86768	20180730_MV_JS_Wildermuth_Diurnal3_20180627ts_QE144_Ag683775-924_USHXG01062_POS_MSMS-v2_root-EON-Brachy-2-434-4-R_IR01__278.h5	6.83	2	112.051,244.093	0.9871	[2M+H]+	487.178	487.178	0.0007	1.3827	6.61	6.99	6.87	6.78	0.09	cytidine	0041_Salsolinol_negative_M-H178p0873_8p09	0	0	0	0	0	11392.3	0	7830.96	0	30045.7	0
75	cytidine 2',3'-cyclic mono-phosphoric acid	yes	cytidine 2',3'-cyclic mono-phosphoric acid			C9H12N3O7P	positive	305.041	NMPZCCZXCOMSDQ-ZRTZXPPTSA-N	1	1	1	3	Level 1+				perfect match to internal reference library	24214820	20180730_MV_JS_Wildermuth_Diurnal3_20180627ts_QE144_Ag683775-924_USHXG01062_POS_MSMS-v2_shoot-EOD-Brachy-2-434-3-S_IR01__040.h5	13.9214	20180730_MV_JS_Wildermuth_Diurnal3_20180627ts_QE144_Ag683775-924_USHXG01062_POS_MSMS-v2_shoot-EOD-Brachy-2-434-3-S_IR01__040.h5	14	7	69.034,98.985,112.051,135.055,162.066,178.061,306.048	0.7758	[M+H]+	306.049	306.048	0.0006	1.8022	13.91	14.11	13.92	14	0.08	cytidine 2',3'-cyclic mono-phosphoric acid	0042_N-Acetyl-L-alanine_negative_M-H130p0509_8p27	24016.4	0	9551.61	27056.2	8389.17	13971.9	0	9519.82	32952	185772	103572
20	cytosine	yes	cytosine			C4H5N3O	positive	111.043	OPTASPLRGRRNAP-UHFFFAOYSA-N	1	1	1	3	Level 1+				perfect match to internal reference library	14587103	20180730_MV_JS_Wildermuth_Diurnal3_20180627ts_QE144_Ag683775-924_USHXG01062_POS_MSMS-v2_root-EON-Brachy-6-439-4-R_IR01__025.h5	4.77655	20180730_MV_JS_Wildermuth_Diurnal3_20180627ts_QE144_Ag683775-924_USHXG01062_POS_MSMS-v2_root-EON-Arabidopsis-5-455-4-R_IR01__022.h5	4.87	4	69.046,94.041,95.024,112.051	0.926	[M+H]+	112.051	112.051	0	0.0357	4.67	5.04	4.78	4.84	0.06	cytosine	0043_guanosine_negative_M-H282p0844_8p48	24838.2	9048	0	0	0	0	9133.61	0	1.61768e+06	1.28133e+06	4723414
93	dAMP	yes	dAMP			C10H14N5O6P	negative	331.068	KHWCHTKSEGGWEX-RRKCRQDMSA-N	0	1	1	2	Level 1				no ref match available or no MSMS collected	4.89055e+06	20180730_MV_JS_Wildermuth_Diurnal3_20180627ts_QE144_Ag683775-924_USHXG01062_NEG_MSMS-v2_shoot-EON-Brachy-2-434-4-S_IR02__068.h5	14.6133						[M-H]-	330.061	330.06	0.0004	1.1054	14.38	14.7	14.61	14.59	0.02	dAMP	0044_L-phenylalanine_negative_M-H164p0717_8p88	24671.6	5558.42	14065.5	29353.4	11902.3	15961.9	15407.2	12024.2	2.89941e+06	12976112	4.38309e+06
25	deoxycytidine	yes	deoxycytidine	deoxycytidine//deoxycytidine	CKTSBUTUHBMZGZ-SHYZEUOFSA-N//CKTSBUTUHBMZGZ-SHYZEUOFSA-N	C9H13N3O4	positive	227.091	CKTSBUTUHBMZGZ-SHYZEUOFSA-N	1	1	1	3	Level 1+				perfect match to internal reference library	3.16915e+06	20180730_MV_JS_Wildermuth_Diurnal3_20180627ts_QE144_Ag683775-924_USHXG01062_POS_MSMS-v2_shoot-EOD-Brachy-2-434-3-S_IR01__040.h5	5.54573	20180730_MV_JS_Wildermuth_Diurnal3_20180627ts_QE144_Ag683775-924_USHXG01062_POS_MSMS-v2_root-EOD-Brachy-4-437-3-R_IR01__052.h5	5.61	3	112.051,117.055,228.233	0.7494	[M+H]+	228.098	228.097	0.0006	2.6012	5.46	5.71	5.55	5.59	0.04	deoxycytidine	0045_xanthurenic_acid_negative_M-H204p0302_8p94	0	0	9296.88	0	10171.5	0	8263.39	9118.28	667024	1.24714e+06	651235
6	dethiobiotin	yes	dethiobiotin			C10H18N2O3	positive	214.132	AUTOLBMXDDTRRT-JGVFFNPUSA-N	0	1	1	2	Level 1				no ref match available or no MSMS collected	3.07476e+06	20180730_MV_JS_Wildermuth_Diurnal3_20180627ts_QE144_Ag683775-924_USHXG01062_POS_MSMS-v2_shoot-EON-Brachy-3-436-4-S_IR01_rerun_239.h5	1.95395						[M+H]+	215.139	215.138	0.0005	2.4655	1.44	1.66	1.95	1.53	0.43	dethiobiotin	0046_dopamine_negative_M-H152p0717_9p14	14887.6	9063.58	10809.5	9046.09	14076.7	0	6450.54	7030.89	32319.5	21347.3	18163.6
72	dihexose pk 1 (ex. sucrose, palatinose)	yes	sucrose	palatinose//sucrose	PVXPPJIGRGXGCY-TZLCEDOOSA-N//CZMRCDWAGMRECN-UGDNZRGBSA-N	C12H22O11	negative	342.116	CZMRCDWAGMRECN-UGDNZRGBSA-N	1	1	1	3	Level 1+	unresolvable isomers		multiple, unresolvable peaks	perfect match to internal reference library	880808960	20180730_MV_JS_Wildermuth_Diurnal3_20180627ts_QE144_Ag683775-924_USHXG01062_NEG_MSMS-v2_shoot-EOD-Brachy-6-439-3-S_IR02__107.h5	13.3021	20180730_MV_JS_Wildermuth_Diurnal3_20180627ts_QE144_Ag683775-924_USHXG01062_NEG_MSMS-v2_root-EOD-Medicago-5-449-3b-R_IR02_rerun_219.h5	13.14	12	59.012,71.012,87.008,89.023,101.023,113.023,119.034,131.034,143.034,161.045,179.055,341.109	0.8603	[M-H]-	341.109	341.109	0	0.0458	13.11	13.41	13.3	13.24	0.06	dihexose pk 1 (ex. sucrose, palatinose)	0047_DL-Leucine_negative_M-H130p0873_9p22	62819.4	15806.1	35001.2	64174.2	22423.5	41501.1	29401.3	22193.3	3.64253e+06	24028108	8640747
80	dihexose pk 2 (ex. maltose, cellobiose)	yes	maltose	cellobiose//maltose	GUBGYTABKSRVRQ-CUHNMECISA-N//GUBGYTABKSRVRQ-PICCSMPSSA-N	C12H22O11	negative	342.116	GUBGYTABKSRVRQ-PICCSMPSSA-N	1	1	1	3	Level 1+	unresolvable isomers		multiple, unresolvable peaks	perfect match to external reference library	9539503	20180730_MV_JS_Wildermuth_Diurnal3_20180627ts_QE144_Ag683775-924_USHXG01062_NEG_MSMS-v2_shoot-EOD-Arabidopsis-3-453-3-S_IR02__270.h5	13.9143						[M-H]-	341.109	341.109	0.0001	0.4335	13.73	14	13.91	13.87	0.04	dihexose pk 2 (ex. maltose, cellobiose)	0048_L-Norleucine_negative_M-H130p0873_9p24	62819.4	15806.1	35001.2	64174.2	22423.5	41501.1	29401.3	22193.3	3.64253e+06	24028108	8640747
89	dihexose pk 3 (ex. trehalose)	yes	trehalose			C12H22O11	negative	342.116	HDTRYLNUVZCQOY-LIZSDCNHSA-N	0	1	1	2	Level 1			multiple, unresolvable peaks	no ref match available or no MSMS collected	1813767	20180730_MV_JS_Wildermuth_Diurnal3_20180627ts_QE144_Ag683775-924_USHXG01062_NEG_MSMS-v2_shoot-EON-Brachy-1-433-4-S_IR02__065.h5	14.2949						[M-H]-	341.109	341.109	0.0002	0.6855	14.22	14.51	14.29	14.38	0.09	dihexose pk 3 (ex. trehalose)	0049_l-isoleucine_negative_M-H130p0873_9p60	62993.2	12891.4	29624	73041.1	14602.4	38326.8	21885.8	21071.9	2.19163e+06	33446182	6.84856e+06
46	dopamine	yes	dopamine			C8H11NO2	negative	153.079	VYFYYTLLBUKUHU-UHFFFAOYSA-N	1	1	1	3	Level 1+				perfect match to internal reference library	1088931712	20180730_MV_JS_Wildermuth_Diurnal3_20180627ts_QE144_Ag683775-924_USHXG01062_NEG_MSMS-v2_root-EON-Arabidopsis-6-456-4-R_IR02_rerun_192.h5	9.14232	20180730_MV_JS_Wildermuth_Diurnal3_20180627ts_QE144_Ag683775-924_USHXG01062_NEG_MSMS-v2_root-EON-Brachy-4-437-4-R_IR02__276.h5	9.54	8	122.036,123.044,124.015,136.015,137.023,152.071,153.018,154.026	0.9602	[M-H]-	152.072	152.071	0.0011	7.4522	9.14	9.56	9.14	9.28	0.14	dopamine	0050_xanthosine_negative_M-H283p0684_9p68	0	7682.54	0	0	6646.45	0	7110.33	0	138280	166918	218233
61	ectoine	yes	ectoine			C6H10N2O2	positive	142.074	WQXNXVUDBPYKBA-YFKPBYRVSA-N	1	1	1	3	Level 1+				perfect match to internal reference library	10648263	20180730_MV_JS_Wildermuth_Diurnal3_20180627ts_QE144_Ag683775-924_USHXG01062_POS_MSMS-v2_shoot-EOD-Medicago-5-449-3b-S_IR01_rerun_221.h5	12.3579	20180730_MV_JS_Wildermuth_Diurnal3_20180627ts_QE144_Ag683775-924_USHXG01062_POS_MSMS-v2_shoot-EOD-Medicago-3-444-3a-S_IR01_rerun_334.h5	12.52	6	56.050,68.050,73.077,97.076,101.071,143.082	0.9069	[M+H]+	143.082	143.081	0.0002	1.6429	12.46	12.74	12.36	12.58	0.22	ectoine	0051_3-METHYLGLUTARIC_ACID_negative_M-H145p0506_9p80	222451	51626	202236	263301	74723	228354	54104.6	195785	231986	1.02954e+06	852484
3	ferulic acid	yes	ferulic acid			C10H10O4	negative	194.058	KSEBMYQBYZTDHS-HWKANZROSA-N	1	1	1	3	Level 1+				perfect match to internal reference library	11841384	20180730_MV_JS_Wildermuth_Diurnal3_20180627ts_QE144_Ag683775-924_USHXG01062_NEG_MSMS-v2_shoot-EOD-Brachy-2-434-3-S_IR02__041.h5	1.28982	20180730_MV_JS_Wildermuth_Diurnal3_20180627ts_QE144_Ag683775-924_USHXG01062_NEG_MSMS-v2_shoot-EOD-Brachy-5-438-3-S_IR02_rerun_349.h5	1.22	5	134.036,137.024,149.060,178.026,193.049	0.7103	[M-H]-	193.051	193.05	0.0009	4.8858	1.17	1.43	1.29	1.27	0.02	ferulic acid	0052_D-Tryptophan_negative_M-H203p0826_10p05	0	0	0	0	6587.51	0	11883.7	8905.63	1466480	6480652	1.90529e+06
111	fumaric acid	yes	fumaric acid			C4H4O4	negative	116.011	VZCYOOQTPOCHFL-OWOJBTEDSA-N	1	1	1	3	Level 1+				perfect match to internal reference library	70720384	20180730_MV_JS_Wildermuth_Diurnal3_20180627ts_QE144_Ag683775-924_USHXG01062_NEG_MSMS-v2_shoot-EOD-Arabidopsis-1-451-3-S_IR02_rerun_343.h5	16.3333	20180730_MV_JS_Wildermuth_Diurnal3_20180627ts_QE144_Ag683775-924_USHXG01062_NEG_MSMS-v2_shoot-EOD-Arabidopsis-6-456-3-S_IR02__035.h5	16.2	4	71.012,97.930,114.933,115.002	0.7169	[M-H]-	115.004	115.002	0.0014	11.8436	16.11	16.39	16.33	16.17	0.16	fumaric acid	0053_2_3Cyclic_AMP_negative_M-H328p0452_10p55	0	0	0	0	0	0	0	0	286059	804642	302412
88	gluconic acid	yes	gluconic acid			C6H12O7	negative	196.058	RGHNJXZEOKUKBD-SQOUGZDYSA-N	1	1	1	3	Level 1+				perfect match to internal reference library	434755552	20180730_MV_JS_Wildermuth_Diurnal3_20180627ts_QE144_Ag683775-924_USHXG01062_NEG_MSMS-v2_shoot-EON-Brachy-2-434-4-S_IR02__068.h5	14.2371	20180730_MV_JS_Wildermuth_Diurnal3_20180627ts_QE144_Ag683775-924_USHXG01062_NEG_MSMS-v2_root-EON-Arabidopsis-4-454-4-R_IR02__086.h5	14.59	3	75.007,129.018,195.050	0.8224	[M-H]-	195.051	195.05	0.0008	4.3259	14.16	14.68	14.24	14.52	0.28	gluconic acid	0054_L-norvaline_negative_M-H116p0717_10p65	63443	12559.7	32432.2	66138.7	15020.8	34159.9	17448.2	20036.7	4212643	47332684	12840334
101	glucosaminic acid	yes	glucosaminic acid			C6H13NO6	negative	195.074	UFYKDFXCZBTLOO-TXICZTDVSA-N	1	1	1	3	Level 1+				perfect match to internal reference library	6.58813e+06	20180730_MV_JS_Wildermuth_Diurnal3_20180627ts_QE144_Ag683775-924_USHXG01062_NEG_MSMS-v2_root-EON-Arabidopsis-6-456-4-R_IR02_rerun_192.h5	15.3207	20180730_MV_JS_Wildermuth_Diurnal3_20180627ts_QE144_Ag683775-924_USHXG01062_NEG_MSMS-v2_root-EON-Brachy-4-437-4-R_IR02__276.h5	15.34	6	74.023,86.023,89.023,128.034,158.044,194.067	0.7988	[M-H]-	194.067	194.066	0.0008	3.8827	15.27	15.53	15.32	15.39	0.07	glucosaminic acid	0055_L-proline_negative_M-H114p0560_10p80	16207.3	5728.52	9759.55	15950.3	6369.79	12614.6	9203.86	0	1.23865e+06	3013300	2.97284e+06
99	glucuronic acid	yes	glucuronic acid			C6H10O7	negative	194.043	AEMOLEFTQBMNLQ-AQKNRBDQSA-N	1	1	1	3	Level 1+				perfect match to internal reference library	4682325	20180730_MV_JS_Wildermuth_Diurnal3_20180627ts_QE144_Ag683775-924_USHXG01062_NEG_MSMS-v2_root-EOD-Arabidopsis-6-456-3-R_IR02_rerun_258.h5	15.0044	20180730_MV_JS_Wildermuth_Diurnal3_20180627ts_QE144_Ag683775-924_USHXG01062_NEG_MSMS-v2_root-EOD-Arabidopsis-1-451-3-R_IR02__092.h5	15.02	10	59.012,71.012,72.992,85.028,89.023,95.012,101.023,103.002,113.023,193.034	0.8185	[M-H]-	193.035	193.035	0.0009	4.4569	14.72	15.08	15	14.97	0.04	glucuronic acid	0056_l-Pipecolic_acid_negative_M-H128p0717_10p86	18477.5	3073.21	9066.83	17377.2	3707.49	17132.4	3226.99	0	2.01327e+06	494326	648295
7	glucuronolactone	yes	glucuronolactone			C6H8O6	positive	176.032	UYUXSRADSPPKRZ-SKNVOMKLSA-N	0	1	1	2	Level 1				no ref match available or no MSMS collected	4.41745e+06	20180730_MV_JS_Wildermuth_Diurnal3_20180627ts_QE144_Ag683775-924_USHXG01062_POS_MSMS-v2_root-EOD-Arabidopsis-6-456-3-R_IR01_rerun_257.h5	2.0368						[M+NH4]+	194.066	194.067	0.0008	4.2089	2.1	2.32	2.04	2.23	0.19	glucuronolactone	0057_L-valine_negative_M-H116p0717_11p00	63443	12559.7	32432.2	66138.7	15020.8	34159.9	17448.2	20036.7	4212643	47332684	12840334
105	glutamic acid	yes	glutamic acid			C5H9NO4	negative	147.053	WHUUTDBJXJRKMK-VKHMYHEASA-N	1	1	1	3	Level 1+				perfect match to internal reference library	675867264	20180730_MV_JS_Wildermuth_Diurnal3_20180627ts_QE144_Ag683775-924_USHXG01062_NEG_MSMS-v2_shoot-EON-Brachy-3-436-4-S_IR02_rerun_240.h5	15.7671	20180730_MV_JS_Wildermuth_Diurnal3_20180627ts_QE144_Ag683775-924_USHXG01062_NEG_MSMS-v2_root-EON-Brachy-6-439-4-R_IR02__026.h5	15.85	3	102.055,128.034,146.045	0.9001	[M-H]-	146.046	146.045	0.0012	8.4394	15.79	15.93	15.77	15.89	0.12	glutamic acid	0058_uric_acid_negative_M-H167p0210_11p03	13483.1	0	0	10207.1	5289.53	0	0	0	13429658	6754036	8534854
84	glutamine	yes	glutamine			C5H10N2O3	negative	146.069	ZDXPYRJPNDTMRX-VKHMYHEASA-N	1	1	1	3	Level 1+				perfect match to internal reference library	1236472448	20180730_MV_JS_Wildermuth_Diurnal3_20180627ts_QE144_Ag683775-924_USHXG01062_NEG_MSMS-v2_shoot-EOD-Arabidopsis-5-455-3-S_IR02_rerun_252.h5	14.1609	20180730_MV_JS_Wildermuth_Diurnal3_20180627ts_QE144_Ag683775-924_USHXG01062_NEG_MSMS-v2_root-EON-Brachy-5-438-4-R_IR02_rerun_346.h5	14.21	14	72.008,74.023,82.029,84.044,86.023,98.023,99.055,101.071,107.024,109.039,125.035,127.050,128.034,145.061	0.8471	[M-H]-	145.062	145.061	0.0013	8.7128	14.19	14.37	14.16	14.28	0.12	glutamine	0059_O-acetyl-L-serine_negative_M-H146p0459_11p15	33029.2	6587.14	11354.5	27041.3	5576.71	18879.8	4464.82	0	58403	59201.3	31126
106	glutathione	yes	glutathione			C10H17N3O6S	negative	307.084	RWSXRVCMGQZWBV-WDSKDSINSA-N	1	1	1	3	Level 1+			multiple, unresolvable peaks	perfect match to internal reference library	2633806	20180730_MV_JS_Wildermuth_Diurnal3_20180627ts_QE144_Ag683775-924_USHXG01062_NEG_MSMS-v2_shoot-EOD-Arabidopsis-2-452-3-S_IR02__095.h5	15.857	20180730_MV_JS_Wildermuth_Diurnal3_20180627ts_QE144_Ag683775-924_USHXG01062_NEG_MSMS-v2_shoot-EON-Medicago-1-442-4c-S_IR02_rerun_249.h5	15.99	7	128.033,143.045,160.007,179.045,254.077,272.088,306.077	0.6907	[M-H]-	306.077	306.077	0.0004	1.4557	15.78	16.04	15.86	15.94	0.09	glutathione	0060_3-dehydroshikimate_negative_M-H171p0299_11p31	36484.5	10445.4	36188.1	36813.6	12897.1	30763.5	12156.7	42451.4	99449.6	103918	201061
23	glyceraldehyde and/or lactic acid	yes	glyceraldehyde	glyceraldehyde//lactic acid	MNQZXJOMYWMBOU-UHFFFAOYSA-N//JVTAAEKCZFNVCJ-REOHCLBHSA-N	C3H6O3	negative	90.0317	MNQZXJOMYWMBOU-UHFFFAOYSA-N	1	1	1	3	Level 1+	glyceraldehyde and lactic acid standards have overlap of mz, rt, msms			perfect match to internal reference library	9892045	20180730_MV_JS_Wildermuth_Diurnal3_20180627ts_QE144_Ag683775-924_USHXG01062_NEG_MSMS-v2_root-EOD-Arabidopsis-6-456-3-R_IR02_rerun_258.h5	4.98246	20180730_MV_JS_Wildermuth_Diurnal3_20180627ts_QE144_Ag683775-924_USHXG01062_NEG_MSMS-v2_root-EOD-Arabidopsis-3-453-3-R_IR02_rerun_355.h5	4.75	2	71.012,89.023	0.9692	[M-H]-	89.0244	89.0229	0.0015	17.0478	4.53	5.21	4.98	4.95	0.03	glyceraldehyde and/or lactic acid	0061_D-Glyceric_acid_negative_M-H105p0193_11p42	57321.1	10666.4	38618.4	57095.5	7992.52	29232.9	12121.5	13582.1	1.26487e+06	2489051	8589104
61	glyceric acid and or isomers	yes	glyceric acid			C3H6O4	negative	106.027	RBNPOMFGQQGHHO-UWTATZPHSA-N	1	1	1	3	Level 1+			multiple, unresolvable peaks	perfect match to internal reference library	38125216	20180730_MV_JS_Wildermuth_Diurnal3_20180627ts_QE144_Ag683775-924_USHXG01062_NEG_MSMS-v2_shoot-EON-Brachy-5-438-4-S_IR02_rerun_234.h5	11.4188	20180730_MV_JS_Wildermuth_Diurnal3_20180627ts_QE144_Ag683775-924_USHXG01062_NEG_MSMS-v2_shoot-EON-Brachy-2-434-4-S_IR02__068.h5	10.74	3	72.992,75.007,105.018	0.9264	[M-H]-	105.019	105.018	0.0014	13.5941	10.43	11.52	11.42	11.25	0.17	glyceric acid and or isomers	0062_L-Pyroglutamic_acid_negative_M-H128p0353_11p53	2831734	498988	395745	2.24772e+06	388769	2.36889e+06	486112	171875	12012079	136972064	37682432
97	glycerol phosphoric acid	yes	glycerol 2-phosphoric acid	glycerol 2-phosphoric acid//sn-glycerol 3-phosphoric acid	DHCLVCXQIBBOPH-UHFFFAOYSA-N//AWUCVROLDVIAJX-GSVOUGTGSA-N	C3H9O6P	negative	172.014	DHCLVCXQIBBOPH-UHFFFAOYSA-N	1	1	1	3	Level 1+	unresolvable isomers			co-isolated precursor but all reference ions are in sample spectrum	7.07727e+06	20180730_MV_JS_Wildermuth_Diurnal3_20180627ts_QE144_Ag683775-924_USHXG01062_NEG_MSMS-v2_shoot-EON-Brachy-5-438-4-S_IR02_rerun_234.h5	14.9951	20180730_MV_JS_Wildermuth_Diurnal3_20180627ts_QE144_Ag683775-924_USHXG01062_NEG_MSMS-v2_shoot-EOD-Brachy-4-437-3-S_IR02__029.h5	15.14	3	78.958,96.968,171.005	0.8779	[M-H]-	171.006	171.005	0.001	6.086	15.06	15.4	15	15.23	0.23	glycerol phosphoric acid	0063_L-tyrosine_negative_M-H180p0666_11p73	15907.7	5587.25	9217.74	20763.9	9856.52	9889.35	6113.13	6831.72	1.16837e+06	5403202	2.07727e+06
83	glycine	yes	glycine			C2H5NO2	negative	75.032	DHMQDGOQFOQNFH-UHFFFAOYSA-N	1	1	1	3	Level 1+				perfect match to internal reference library	6323928	20180730_MV_JS_Wildermuth_Diurnal3_20180627ts_QE144_Ag683775-924_USHXG01062_NEG_MSMS-v2_shoot-EOD-Brachy-5-438-3-S_IR02_rerun_349.h5	13.9661	20180730_MV_JS_Wildermuth_Diurnal3_20180627ts_QE144_Ag683775-924_USHXG01062_NEG_MSMS-v2_shoot-EOD-Arabidopsis-3-453-3-S_IR02__270.h5	14.03	1	74.023	0	[M-H]-	74.0247	74.0233	0.0014	19.4361	13.97	14.16	13.97	14.05	0.08	glycine	0064_2-acetamido-3-hydroxypropanoic_acid_negative_M-H146p0459_11p75	38122.4	5838.74	11320.6	29919.3	4299.14	22278.7	4473.63	8091.63	178743	481227	429249
28	guanine	yes	guanine			C5H5N5O	positive	151.049	UYTPUPDQBNUYGX-UHFFFAOYSA-N	1	1	1	3	Level 1+				perfect match to internal reference library	157759552	20180730_MV_JS_Wildermuth_Diurnal3_20180627ts_QE144_Ag683775-924_USHXG01062_POS_MSMS-v2_shoot-EOD-Medicago-1-442-3a-S_IR01__103.h5	6.18563	20180730_MV_JS_Wildermuth_Diurnal3_20180627ts_QE144_Ag683775-924_USHXG01062_POS_MSMS-v2_root-EOD-Medicago-5-449-3b-R_IR01_rerun_218.h5	6.23	7	109.051,110.035,128.046,134.046,135.030,152.057,153.041	0.9517	[M+H]+	152.057	152.056	0.0003	2.1824	6.04	6.44	6.19	6.23	0.04	guanine	0065_histamine_negative_M-H110p0723_12p06	6283.89	0	8079.73	12003.2	0	6470.53	0	9342.23	0	6016.75	7513.44
43	guanosine	yes	guanosine			C10H13N5O5	negative	283.092	NYHBQMYGNKIUIF-UUOKFMHZSA-N	1	1	1	3	Level 1+			multiple, unresolvable peaks	perfect match to internal reference library	51456752	20180730_MV_JS_Wildermuth_Diurnal3_20180627ts_QE144_Ag683775-924_USHXG01062_NEG_MSMS-v2_shoot-EON-Brachy-5-438-4-S_IR02_rerun_234.h5	8.47733	20180730_MV_JS_Wildermuth_Diurnal3_20180627ts_QE144_Ag683775-924_USHXG01062_NEG_MSMS-v2_root-EON-Arabidopsis-1-451-4-R_IR02__077.h5	8.5	2	150.041,282.085	0.9558	[M-H]-	282.084	282.084	0.0001	0.2441	8.13	8.85	8.48	8.36	0.11	guanosine	0066_2-Aminoisobutyric_acid_negative_M-H102p0560_12p27	13150.4	4084.91	10060.5	14813.3	2848.05	9648.6	3177.61	5572.39	95718.9	297976	266366
74	guanosine 3',5'-cyclic monophosphoric acid	yes	guanosine 3',5'-cyclic monophosphoric acid			C10H12N5O7P	positive	345.047	ZOOGRGPOEVQQDX-UUOKFMHZSA-N	0.5	1	1	2.5	Level 1+				partial match of fragments	38523296	20180730_MV_JS_Wildermuth_Diurnal3_20180627ts_QE144_Ag683775-924_USHXG01062_POS_MSMS-v2_shoot-EOD-Brachy-2-434-3-S_IR01__040.h5	13.8411	20180730_MV_JS_Wildermuth_Diurnal3_20180627ts_QE144_Ag683775-924_USHXG01062_POS_MSMS-v2_shoot-EON-Brachy-6-439-4-S_IR01__293.h5	13.87	2	152.057,346.055	0.8961	[M+H]+	346.055	346.054	0.0008	2.3891	13.8	14.05	13.84	13.9	0.06	guanosine 3',5'-cyclic monophosphoric acid	0067_L-histidinol_negative_M-H140p0829_12p82	6584.25	0	0	0	0	0	0	0	23213.1	35154.9	55884
80	hexosamine	yes	mannosamine			C6H13NO5	positive	179.079	MSWZFWKMSRAUBD-CBPJZXOFSA-N	0	1	1	2	Level 1			multiple, unresolvable peaks	no ref match available or no MSMS collected	887091	20180730_MV_JS_Wildermuth_Diurnal3_20180627ts_QE144_Ag683775-924_USHXG01062_POS_MSMS-v2_shoot-EON-Brachy-5-438-4-S_IR01_rerun_233.h5	14.3437						[M+H]+	180.087	180.086	0.0004	2.0255	14.1	14.25	14.34	14.19	0.16	hexosamine	0068_quinic_acid_negative_M-H191p0561_13p02	72953.4	23348.2	44598.4	50390.8	37642	38981.7	29849.9	21447.7	2.03671e+06	3.32163e+06	3.73963e+06
112	hexose phosphate	yes	alpha-galactose 1-phosphoric acid	alpha-galactose 1-phosphoric acid//glucose 6-phosphoric acid	HXXFSFRBOHSIMQ-FPRJBGLDSA-N//NBSCHQHZLSJFNQ-GASJEMHNSA-N	C6H13O9P	negative	260.03	HXXFSFRBOHSIMQ-FPRJBGLDSA-N	1	1	1	3	Level 1+	unresolvable isomers			perfect match to internal reference library	6215392	20180730_MV_JS_Wildermuth_Diurnal3_20180627ts_QE144_Ag683775-924_USHXG01062_NEG_MSMS-v2_root-EON-Arabidopsis-1-451-4-R_IR02__077.h5	16.3748	20180730_MV_JS_Wildermuth_Diurnal3_20180627ts_QE144_Ag683775-924_USHXG01062_NEG_MSMS-v2_root-EON-Arabidopsis-1-451-4-R_IR02__077.h5	16.45	6	78.958,96.968,138.979,168.990,199.001,259.022	0.8673	[M-H]-	259.022	259.022	0	0.0823	16.21	16.6	16.37	16.4	0.03	hexose phosphate	0069_4033-40-3_negative_M-H173p0568_13p09	22715.6	11072	10323.3	37492.5	8094.16	26299.8	8025.41	12283.2	869767	1.50793e+06	1.12639e+06
60	histamine	yes	histamine			C5H9N3	positive	111.08	NTYJJOPFIAHURM-UHFFFAOYSA-N	1	1	1	3	Level 1+				perfect match to internal reference library	429449504	20180730_MV_JS_Wildermuth_Diurnal3_20180627ts_QE144_Ag683775-924_USHXG01062_POS_MSMS-v2_root-EON-Arabidopsis-6-456-4-R_IR01_rerun_191.h5	12.0504	20180730_MV_JS_Wildermuth_Diurnal3_20180627ts_QE144_Ag683775-924_USHXG01062_POS_MSMS-v2_root-EON-Brachy-5-438-4-R_IR01_rerun_345.h5	12.67	4	68.050,83.061,95.061,112.087	0.9589	[M+H]+	112.087	112.087	0.0001	0.5145	12.33	12.8	12.05	12.54	0.49	histamine	0070_L-Hydroxyproline_negative_M-H130p0509_13p11	27997.2	4380.88	14922.3	28321.5	5992.35	20962.6	7122.57	6394.13	161175	601385	411006
81	histidine	yes	histidine			C6H9N3O2	positive	155.069	HNDVDQJCIGZPNO-YFKPBYRVSA-N	1	1	1	3	Level 1+				perfect match to internal reference library	238691120	20180730_MV_JS_Wildermuth_Diurnal3_20180627ts_QE144_Ag683775-924_USHXG01062_POS_MSMS-v2_shoot-EON-Medicago-2-444-4b-S_IR01_rerun_212.h5	14.6997	20180730_MV_JS_Wildermuth_Diurnal3_20180627ts_QE144_Ag683775-924_USHXG01062_POS_MSMS-v2_root-EON-Arabidopsis-6-456-4-R_IR01_rerun_191.h5	14.81	4	83.061,95.061,110.072,156.077	0.9506	[M+H]+	156.077	156.077	0.0002	1.3834	14.74	14.99	14.7	14.88	0.18	histidine	0071_L-alanine_negative_M-H88p0404_13p26	51584.5	6535.16	44555.4	76557.4	6839.46	38290.7	13221.7	20366.8	2.31795e+06	13171095	20753534
62	histidinol	yes	histidinol			C6H11N3O	positive	141.09	ZQISRDCJNBUVMM-YFKPBYRVSA-N	1	1	1	3	Level 1+				perfect match to internal reference library	85971232	20180730_MV_JS_Wildermuth_Diurnal3_20180627ts_QE144_Ag683775-924_USHXG01062_POS_MSMS-v2_root-EON-Arabidopsis-6-456-4-R_IR01_rerun_191.h5	12.8105	20180730_MV_JS_Wildermuth_Diurnal3_20180627ts_QE144_Ag683775-924_USHXG01062_POS_MSMS-v2_root-EOD-Brachy-3-436-3-R_IR01_rerun_331.h5	13.13	4	81.045,95.061,124.087,142.098	0.8476	[M+H]+	142.097	142.097	0.0002	1.5349	12.89	13.26	12.81	13.07	0.26	histidinol	0072_sucrose_negative_M-H341p1089_13p30	428932	273058	458244	475800	314008	195214	308449	204092	58960248	7844004	60954060
72	homoserine	yes	homoserine			C4H9NO3	positive	119.058	UKAUYVFTDYCKQA-VKHMYHEASA-N	0.5	1	1	2.5	Level 1+				partial match of fragments	3796435	20180730_MV_JS_Wildermuth_Diurnal3_20180627ts_QE144_Ag683775-924_USHXG01062_POS_MSMS-v2_shoot-EON-Brachy-5-438-4-S_IR01_rerun_233.h5	13.7226	20180730_MV_JS_Wildermuth_Diurnal3_20180627ts_QE144_Ag683775-924_USHXG01062_POS_MSMS-v2_shoot-EON-Medicago-2-444-4b-S_IR01_rerun_212.h5	13.73	2	96.996,120.067	0.0784	[M+H]+	120.066	120.066	0.0001	0.6802	13.68	13.78	13.72	13.75	0.02	homoserine	0073_L-threonine_negative_M-H118p0509_13p35	35705.8	7399.1	23773.2	40899.3	12820.9	22623.6	8275.3	19509.2	4753194	38960720	35890728
6	hydroxycinnamic acid	yes	4-coumaric acid	2-hydroxycinnamic acid//4-coumaric acid	PMOWTIHVNWZYFI-AATRIKPKSA-N//NGSWKAQJJWESNS-ZZXKWVIFSA-N	C9H8O3	negative	164.047	NGSWKAQJJWESNS-ZZXKWVIFSA-N	1	1	1	3	Level 1+	unresolvable isomers			co-isolated precursor but all reference ions are in sample spectrum	6.44118e+06	20180730_MV_JS_Wildermuth_Diurnal3_20180627ts_QE144_Ag683775-924_USHXG01062_NEG_MSMS-v2_root-EOD-Arabidopsis-6-456-3-R_IR02_rerun_258.h5	1.5022	20180730_MV_JS_Wildermuth_Diurnal3_20180627ts_QE144_Ag683775-924_USHXG01062_NEG_MSMS-v2_shoot-EOD-Brachy-5-438-3-S_IR02_rerun_349.h5	1.39	2	119.049,163.039	0.725	[M-H]-	163.04	163.039	0.0012	7.1873	1.33	1.65	1.5	1.49	0.02	hydroxycinnamic acid	0074_L-Allothreonine_negative_M-H118p0509_13p45	35705.8	7399.1	23773.2	40899.3	12820.9	22623.6	8275.3	19509.2	4753194	38960720	35890728
15	hypoxanthine	yes	hypoxanthine			C5H4N4O	positive	136.039	FDGQSTZJBFJUBT-UHFFFAOYSA-N	1	1	1	3	Level 1+				perfect match to internal reference library	16012549	20180730_MV_JS_Wildermuth_Diurnal3_20180627ts_QE144_Ag683775-924_USHXG01062_POS_MSMS-v2_root-EOD-Arabidopsis-6-456-3-R_IR01_rerun_257.h5	3.04261	20180730_MV_JS_Wildermuth_Diurnal3_20180627ts_QE144_Ag683775-924_USHXG01062_POS_MSMS-v2_root-EOD-Arabidopsis-6-456-3-R_IR01_rerun_257.h5	3.03	5	94.041,110.035,119.035,137.046,138.050	0.7955	[M+H]+	137.046	137.045	0.0004	2.7312	2.91	3.23	3.04	3.07	0.02	hypoxanthine	0075_cis-4-Hydroxy-D-proline_negative_M-H130p0509_13p53	27997.2	4380.88	14922.3	28321.5	5992.35	20962.6	7122.57	6394.13	161175	601385	411006
3	indole-3-acetic acid	yes	indole-3-acetic acid			C10H9NO2	positive	175.063	SEOVTRFCIGRIMH-UHFFFAOYSA-N	1	1	1	3	Level 1+				perfect match to internal reference library	754146816	20180730_MV_JS_Wildermuth_Diurnal3_20180627ts_QE144_Ag683775-924_USHXG01062_POS_MSMS-v2_shoot-EON-Brachy-5-438-4-S_IR01_rerun_233.h5	1.46761	20180730_MV_JS_Wildermuth_Diurnal3_20180627ts_QE144_Ag683775-924_USHXG01062_POS_MSMS-v2_root-EOD-Brachy-2-434-3-R_IR01__281.h5	1.44	2	130.065,176.071	0.0623	[M+H]+	176.071	176.07	0.0004	2.2085	1.4	1.55	1.47	1.46	0.01	indole-3-acetic acid	0076_Palatinose_negative_M-H341p1089_13p56	428932	273058	458244	475800	314008	195214	308449	204092	58960248	7844004	60954060
25	inosine	yes	inosine			C10H12N4O5	negative	268.081	UGQMRVRMYYASKQ-KQYNXXCUSA-N	0	1	1	2	Level 1				no ref match available or no MSMS collected	1.54162e+06	20180730_MV_JS_Wildermuth_Diurnal3_20180627ts_QE144_Ag683775-924_USHXG01062_NEG_MSMS-v2_shoot-EOD-Medicago-2-442-3b-S_IR02_rerun_207.h5	5.37242						[M-H]-	267.074	267.073	0.0005	1.7001	5.1	5.41	5.37	5.29	0.08	inosine	0077_shikimic_acid_negative_M-H173p0455_13p60	39012.9	24650.6	40861.1	40289.7	21400.9	52016.8	22775.3	44294.3	584041	1058185	2332031
49	isoleucine	yes	isoleucine			C6H13NO2	negative	131.095	AGPKZVBTJJNPAG-WHFBIAKZSA-N	1	1	1	3	Level 1+				perfect match to internal reference library	119335768	20180730_MV_JS_Wildermuth_Diurnal3_20180627ts_QE144_Ag683775-924_USHXG01062_NEG_MSMS-v2_shoot-EON-Brachy-3-436-4-S_IR02_rerun_240.h5	9.60032	20180730_MV_JS_Wildermuth_Diurnal3_20180627ts_QE144_Ag683775-924_USHXG01062_NEG_MSMS-v2_shoot-EON-Arabidopsis-3-453-4-S_IR02__273.h5	9.76	2	60.557,130.086	0.9462	[M-H]-	130.087	130.086	0.0013	9.858	9.58	9.94	9.6	9.78	0.18	isoleucine	0078_4-Guanidinobutyric_acid_negative_M-H144p0778_13p71	0	0	0	0	0	0	4764.34	0	13527.6	38311.5	17826.3
66	isomer of deoxycarnitine	yes	deoxycarnitine			C7H16NO2+	positive	146.118	JHPNVNIEXXLNTR-UHFFFAOYSA-O	1	1	0.5	2.5	Level 1+			rt shifted, isomer of library ref	perfect match to internal reference library	73262416	20180730_MV_JS_Wildermuth_Diurnal3_20180627ts_QE144_Ag683775-924_USHXG01062_POS_MSMS-v2_root-EOD-Arabidopsis-2-452-3-R_IR01_rerun_245.h5	13.2984	20180730_MV_JS_Wildermuth_Diurnal3_20180627ts_QE144_Ag683775-924_USHXG01062_POS_MSMS-v2_root-EOD-Arabidopsis-6-456-3-R_IR01_rerun_257.h5	13.87	3	60.082,87.045,146.118	0.9519	[M]+	146.118	146.117	0.0002	1.6946	13.69	13.96	13.3	13.81	0.51	isomer of deoxycarnitine	0079_cyclic_gmp_negative_M-H344p0401_13p85	64543.9	103729	41240.6	73857.6	106891	78686.6	90397.9	44535.4	251363	795838	539034
48	kynurenine	yes	kynurenine			C10H12N2O3	positive	208.085	YGPSJZOEDVAXAB-QMMMGPOBSA-N	0	1	1	2	Level 1				no ref match available or no MSMS collected	901210	20180730_MV_JS_Wildermuth_Diurnal3_20180627ts_QE144_Ag683775-924_USHXG01062_POS_MSMS-v2_shoot-EON-Medicago-2-444-4b-S_IR01_rerun_212.h5	9.34112						[M+H]+	209.092	209.092	0.0003	1.4482	9.35	9.6	9.34	9.49	0.14	kynurenine	0080_maltose_negative_M-H341p1089_13p91	36873	29034.3	41002.7	29720.4	20179.2	15585.5	35420.6	20359.9	435165	522273	388697
47	leucine and/or norleucine	yes	leucine	leucine//norleucine	ROHFNLRQFUQHCH-UHFFFAOYSA-N//LRQKBLKVPFOOQJ-YFKPBYRVSA-N	C6H13NO2	negative	131.095	ROHFNLRQFUQHCH-UHFFFAOYSA-N	1	1	1	3	Level 1+	leu/nle unresolvable			perfect match to internal reference library	146314912	20180730_MV_JS_Wildermuth_Diurnal3_20180627ts_QE144_Ag683775-924_USHXG01062_NEG_MSMS-v2_shoot-EON-Brachy-3-436-4-S_IR02_rerun_240.h5	9.21845	20180730_MV_JS_Wildermuth_Diurnal3_20180627ts_QE144_Ag683775-924_USHXG01062_NEG_MSMS-v2_root-EOD-Medicago-1-442-3a-R_IR02_rerun_237.h5	9.3	2	52.549,130.086	0.7939	[M-H]-	130.087	130.086	0.0013	9.8795	9.15	9.53	9.22	9.36	0.14	leucine and/or norleucine	0081_cellobiose_negative_M-H341p1089_13p92	36873	29034.3	41002.7	29720.4	20179.2	15585.5	35420.6	20359.9	435165	522273	388697
0	lumichrome	yes	lumichrome			C12H10N4O2	negative	242.08	ZJTJUVIJVLLGSP-UHFFFAOYSA-N	0	1	1	2	Level 1				no ref match available or no MSMS collected	1.86224e+06	20180730_MV_JS_Wildermuth_Diurnal3_20180627ts_QE144_Ag683775-924_USHXG01062_NEG_MSMS-v2_root-EOD-Arabidopsis-6-456-3-R_IR02_rerun_258.h5	1.16103						[M-H]-	241.073	241.073	0.0003	1.1941	1.1	1.18	1.16	1.13	0.03	lumichrome	0082_2_3_cyclic_CMP_negative_M-H304p0340_13p92	0	0	0	0	0	0	0	0	48688.9	131416	98807
99	lysine	yes	lysine			C6H14N2O2	positive	146.106	KDXKERNSBIXSRK-YFKPBYRVSA-N	1	1	1	3	Level 1+				perfect match to internal reference library	224047744	20180730_MV_JS_Wildermuth_Diurnal3_20180627ts_QE144_Ag683775-924_USHXG01062_POS_MSMS-v2_shoot-EON-Brachy-5-438-4-S_IR01_rerun_233.h5	16.8321	20180730_MV_JS_Wildermuth_Diurnal3_20180627ts_QE144_Ag683775-924_USHXG01062_POS_MSMS-v2_shoot-EOD-Brachy-5-438-3-S_IR01_rerun_348.h5	16.95	3	84.081,130.086,147.113	0.9187	[M+H]+	147.113	147.113	0.0003	2.3064	16.92	17	16.83	16.96	0.13	lysine	0083_glycine_negative_M-H74p0247_13p97	17557.8	0	13827.7	18664.3	0	11234.8	0	9365.34	8960.9	543354	359317
32	maleamic acid	yes	maleamic acid			C4H5NO3	negative	115.027	FSQQTNAZHBEJLS-UPHRSURJSA-N	0	1	1	2	Level 1				no ref match available or no MSMS collected	2693699	20180730_MV_JS_Wildermuth_Diurnal3_20180627ts_QE144_Ag683775-924_USHXG01062_NEG_MSMS-v2_shoot-EON-Brachy-5-438-4-S_IR02_rerun_234.h5	6.35418						[M-H]-	114.02	114.018	0.0014	12.5402	6.44	6.99	6.35	6.71	0.36	maleamic acid	0084_L-glutamine_negative_M-H145p0618_14p16	153636	60436.9	117157	122499	53233.1	247736	80882.2	47902.4	132810256	471841632	296685056
21	malonic acid	yes	malonic acid			C3H4O4	negative	104.011	OFOBLEOULBTSOW-UHFFFAOYSA-N	1	1	1	3	Level 1+				perfect match to internal reference library	4768695	20180730_MV_JS_Wildermuth_Diurnal3_20180627ts_QE144_Ag683775-924_USHXG01062_NEG_MSMS-v2_shoot-EOD-Medicago-2-442-3b-S_IR02_rerun_207.h5	4.8406	20180730_MV_JS_Wildermuth_Diurnal3_20180627ts_QE144_Ag683775-924_USHXG01062_NEG_MSMS-v2_shoot-EON-Brachy-2-434-4-S_IR02__068.h5	4.74	2	59.012,103.002	0.8194	[M-H]-	103.004	103.002	0.0015	14.4817	4.44	4.84	4.84	4.65	0.19	malonic acid	0085_L-serine_negative_M-H104p0353_14p17	137477	28774.8	89080	142911	30865.1	60674.6	23995.4	64843.3	1.35052e+06	19771324	12629707
0	methyl indole-3-acetic acid	yes	methyl indole-3-acetic acid			C11H11NO2	positive	189.079	KTHADMDGDNYQRX-UHFFFAOYSA-N	0	1	1	2	Level 1				no ref match available or no MSMS collected	11540572	20180730_MV_JS_Wildermuth_Diurnal3_20180627ts_QE144_Ag683775-924_USHXG01062_POS_MSMS-v2_root-EON-Arabidopsis-6-456-4-R_IR01_rerun_191.h5	1.1679						[M+H]+	190.086	190.086	0.0005	2.5321	1.17	1.67	1.17	1.33	0.16	methyl indole-3-acetic acid	0086_4-aminobutyric_acid_negative_M-H102p0560_14p21	17553	4468.65	10774.7	19514.9	5283.9	17573.9	0	6051.98	842873	9186371	4.46973e+06
20	mevalonic acid	yes	mevalonic acid			C6H12O4	negative	148.074	KJTLQQUUPVSXIM-UHFFFAOYSA-N	0.5	1	1	2.5	Level 1+				co-isolated precursor partial match	1752630	20180730_MV_JS_Wildermuth_Diurnal3_20180627ts_QE144_Ag683775-924_USHXG01062_NEG_MSMS-v2_shoot-EON-Brachy-5-438-4-S_IR02_rerun_234.h5	4.82327	20180730_MV_JS_Wildermuth_Diurnal3_20180627ts_QE144_Ag683775-924_USHXG01062_NEG_MSMS-v2_shoot-EOD-Brachy-5-438-3-S_IR02_rerun_349.h5	4.73	2	59.012,147.066	0.4986	[M-H]-	147.066	147.065	0.0012	7.878	4.54	5.13	4.82	4.78	0.05	mevalonic acid	0087_L-asparagine_negative_M-H131p0462_14p22	355097	92174.5	390903	688203	51342.5	306231	102954	344441	7.26159e+06	110772376	51038756
42	N-acetyl-alanine	yes	N-acetyl-alanine			C5H9NO3	negative	131.058	KTHDTJVBEPMMGL-VKHMYHEASA-N	0	1	1	2	Level 1				no ref match available or no MSMS collected	1.03934e+06	20180730_MV_JS_Wildermuth_Diurnal3_20180627ts_QE144_Ag683775-924_USHXG01062_NEG_MSMS-v2_shoot-EON-Brachy-5-438-4-S_IR02_rerun_234.h5	8.2671						[M-H]-	130.051	130.05	0.0014	10.6008	7.77	8.77	8.27	8.34	0.07	N-acetyl-alanine	0088_gluconic_acid_negative_M-H195p0510_14p24	992198	830707	714959	1.20387e+06	276625	307997	737788	166331	60019396	68811888	70414608
98	N-acetyl-glutamic acid	yes	N-acetyl-glutamic acid			C7H11NO5	negative	189.064	RFMMMVDNIPUKGG-YFKPBYRVSA-N	1	1	1	3	Level 1+				perfect match to internal reference library	73375616	20180730_MV_JS_Wildermuth_Diurnal3_20180627ts_QE144_Ag683775-924_USHXG01062_NEG_MSMS-v2_shoot-EOD-Arabidopsis-5-455-3-S_IR02_rerun_252.h5	14.9972	20180730_MV_JS_Wildermuth_Diurnal3_20180627ts_QE144_Ag683775-924_USHXG01062_NEG_MSMS-v2_shoot-EON-Brachy-3-436-4-S_IR02_rerun_240.h5	15.01	7	59.012,100.075,102.055,128.034,144.066,170.045,188.056	0.8587	[M-H]-	188.056	188.055	0.0009	4.8362	14.97	15.17	15	15.05	0.06	N-acetyl-glutamic acid	0089_trehalose_negative_M-H341p1089_14p29	20271.6	24581.7	22991.5	22656.6	13275.5	17390.8	21243.1	15398.2	238203	222959	334201
30	N-acetyl-hexosamine	yes	N-acetyl-galactosamine	N-acetyl-galactosamine//N-acetyl-glucosamine//N-acetyl-mannosamine	OVRNDRQMDRJTHS-CBQIKETKSA-N//OVRNDRQMDRJTHS-RTRLPJTCSA-N//OVRNDRQMDRJTHS-ZTVVOAFPSA-N	C8H15NO6	positive	221.09	OVRNDRQMDRJTHS-CBQIKETKSA-N	0.5	1	1	2.5	Level 1+	unresolvable isomers			partial match of fragments	9087688	20180730_MV_JS_Wildermuth_Diurnal3_20180627ts_QE144_Ag683775-924_USHXG01062_POS_MSMS-v2_shoot-EON-Brachy-2-434-4-S_IR01__067.h5	6.30566	20180730_MV_JS_Wildermuth_Diurnal3_20180627ts_QE144_Ag683775-924_USHXG01062_POS_MSMS-v2_shoot-EOD-Brachy-3-436-3-S_IR01__284.h5	6.53	8	84.045,98.061,126.055,138.055,144.066,168.066,186.077,204.087	0.537	[M+H]+	222.097	222.097	0.0006	2.4931	6.23	6.85	6.31	6.59	0.28	N-acetyl-hexosamine	0090_S-adenosyl-L-homocysteine_negative_M-H383p1143_14p30	0	0	0	0	0	0	0	0	411383	524192	320030
64	N-acetyl-serine and/or isomers	yes	N-acetyl-serine			C5H9NO4	negative	147.053	JJIHLJJYMXLCOY-UHFFFAOYSA-N	1	1	1	3	Level 1+			multiple, unresolvable peaks	perfect match to internal reference library	2.47631e+06	20180730_MV_JS_Wildermuth_Diurnal3_20180627ts_QE144_Ag683775-924_USHXG01062_NEG_MSMS-v2_shoot-EOD-Arabidopsis-5-455-3-S_IR02_rerun_252.h5	11.7493	20180730_MV_JS_Wildermuth_Diurnal3_20180627ts_QE144_Ag683775-924_USHXG01062_NEG_MSMS-v2_shoot-EON-Arabidopsis-5-455-4-S_IR02__264.h5	11.72	7	70.028,74.023,84.044,98.023,104.034,116.034,146.045	0.8711	[M-H]-	146.046	146.045	0.0012	7.8779	11.48	12.1	11.75	11.71	0.04	N-acetyl-serine and/or isomers	0091_L-Cysteic_acid_negative_M-H167p9972_14p38	42780.7	41706.9	37205.1	49103.9	37796.3	49675	36539.5	39051.4	22908.8	72219	28753.7
82	N-acetylneuraminic acid	yes	N-acetylneuraminic acid			C11H19NO9	positive	309.106	SQVRNKJHWKZAKO-LUWBGTNYSA-N	1	1	1	3	Level 1+				perfect match to internal reference library	4762160	20180730_MV_JS_Wildermuth_Diurnal3_20180627ts_QE144_Ag683775-924_USHXG01062_POS_MSMS-v2_shoot-EOD-Arabidopsis-3-453-3-S_IR01__269.h5	14.7206	20180730_MV_JS_Wildermuth_Diurnal3_20180627ts_QE144_Ag683775-924_USHXG01062_POS_MSMS-v2_shoot-EON-Arabidopsis-1-451-4-S_IR01__037.h5	14.96	4	144.993,170.061,188.072,310.075	0.8952	[M+H]+	310.113	310.112	0.0012	3.8424	14.82	15.01	14.72	14.9	0.18	N-acetylneuraminic acid	0092_melibiose_negative_M-H341p1089_14p61	22447.3	12838.8	12985.6	15530.8	13147.5	17222.6	13715.9	10760	7898768	6407033	9503493
52	N-acetylputrescine	yes	N-acetylputrescine			C6H14N2O	positive	130.111	KLZGKIDSEJWEDW-UHFFFAOYSA-N	0.5	1	1	2.5	Level 1+				partial match of fragments	23324220	20180730_MV_JS_Wildermuth_Diurnal3_20180627ts_QE144_Ag683775-924_USHXG01062_POS_MSMS-v2_shoot-EOD-Brachy-5-438-3-S_IR01_rerun_348.h5	10.1964	20180730_MV_JS_Wildermuth_Diurnal3_20180627ts_QE144_Ag683775-924_USHXG01062_POS_MSMS-v2_shoot-EOD-Brachy-5-438-3-S_IR01_rerun_348.h5	10.5	2	72.081,114.092	0.7419	[M+H]+	131.118	131.118	0.0002	1.4704	10.36	10.81	10.2	10.55	0.36	N-acetylputrescine	0093_dAMP_negative_M-H330p0609_14p61	27136.4	31377.1	17219.7	22843.4	28936.4	24102.8	30811.7	17196.9	25317.9	18934.9	13580.8
2	N-acetylserotonin	yes	N-acetylserotonin			C12H14N2O2	positive	218.106	MVAWJSIDNICKHF-UHFFFAOYSA-N	0.5	1	1	2.5	Level 1+				partial match of fragments	27593496	20180730_MV_JS_Wildermuth_Diurnal3_20180627ts_QE144_Ag683775-924_USHXG01062_POS_MSMS-v2_root-EON-Arabidopsis-6-456-4-R_IR01_rerun_191.h5	1.28876	20180730_MV_JS_Wildermuth_Diurnal3_20180627ts_QE144_Ag683775-924_USHXG01062_POS_MSMS-v2_root-EON-Arabidopsis-6-456-4-R_IR01_rerun_191.h5	1.41	5	190.086,201.102,202.087,219.113,219.172	0.287	[M+H]+	219.113	219.112	0.0006	2.5837	1.1	1.49	1.29	1.25	0.03	N-acetylserotonin	0094_L-histidine_negative_M-H154p0622_14p72	25793.5	14493.8	12695.4	27329.5	4904.04	18870	13231.3	11491.8	5.29811e+06	19987062	7.17285e+06
69	n-alpha-acetyl-asparagine	yes	n-alpha-acetyl-asparagine			C6H10N2O4	negative	174.064	HXFOXFJUNFFYMO-BYPYZUCNSA-N	1	1	1	3	Level 1+				perfect match to internal reference library	5.5064e+06	20180730_MV_JS_Wildermuth_Diurnal3_20180627ts_QE144_Ag683775-924_USHXG01062_NEG_MSMS-v2_shoot-EOD-Arabidopsis-3-453-3-S_IR02__270.h5	13.0865	20180730_MV_JS_Wildermuth_Diurnal3_20180627ts_QE144_Ag683775-924_USHXG01062_NEG_MSMS-v2_shoot-EON-Brachy-2-434-4-S_IR02__068.h5	13.18	9	58.028,70.028,96.007,111.055,113.034,114.018,131.045,155.045,173.056	0.811	[M-H]-	173.057	173.056	0.0011	6.5069	12.95	13.29	13.09	13.11	0.02	n-alpha-acetyl-asparagine	0095_Uridine_5monophosphate_negative_M-H323p0286_14p80	6952.47	0	0	0	0	0	0	0	354193	225355	237712
95	N-trimethyllysine	yes	N-trimethyllysine			C9H21N2O2+	positive	189.16	MXNRLFUSFKVQSK-QMMMGPOBSA-O	1	1	1	3	Level 1+				perfect match to internal reference library	357469280	20180730_MV_JS_Wildermuth_Diurnal3_20180627ts_QE144_Ag683775-924_USHXG01062_POS_MSMS-v2_shoot-EOD-Brachy-4-437-3-S_IR01__028.h5	16.6359	20180730_MV_JS_Wildermuth_Diurnal3_20180627ts_QE144_Ag683775-924_USHXG01062_POS_MSMS-v2_shoot-EON-Brachy-6-439-4-S_IR01__293.h5	16.83	5	60.082,84.082,130.087,144.138,189.160	0.9686	[M]+	189.16	189.159	0.0004	2.2873	16.78	16.9	16.64	16.83	0.2	N-trimethyllysine	0096_L-citrulline_negative_M-H174p0884_14p93	45203.5	15580.8	17253.5	45389.2	12340.6	14019.8	8130.47	21747.4	451661	2.09808e+06	907863
94	NAD+	yes	NAD+			C21H28N7O14P2+	positive	664.116	BAWFJGJZGIEFAR-NNYOXOHSSA-O	1	1	1	3	Level 1+				perfect match to internal reference library	2590487	20180730_MV_JS_Wildermuth_Diurnal3_20180627ts_QE144_Ag683775-924_USHXG01062_POS_MSMS-v2_shoot-EOD-Arabidopsis-2-452-3-S_IR01__094.h5	16.1341	20180730_MV_JS_Wildermuth_Diurnal3_20180627ts_QE144_Ag683775-924_USHXG01062_POS_MSMS-v2_shoot-EON-Arabidopsis-4-454-4-S_IR01_rerun_194.h5	16.33	8	97.029,136.062,232.083,348.072,428.036,524.059,542.068,664.116	0.8939	[M]+	664.116	664.115	0.0011	1.6424	16.26	16.46	16.13	16.33	0.2	NAD+	0097_beta-Glycerophosphoric_acid_negative_M-H171p0064_15p00	0	4853.68	0	5171.38	0	0	0	0	539182	651738	732767
1	nicotinamide	yes	nicotinamide			C6H6N2O	positive	122.048	DFPAKSUCGFBDDF-UHFFFAOYSA-N	1	1	1	3	Level 1+				perfect match to internal reference library	44899200	20180730_MV_JS_Wildermuth_Diurnal3_20180627ts_QE144_Ag683775-924_USHXG01062_POS_MSMS-v2_shoot-EON-Brachy-2-434-4-S_IR01__067.h5	1.20526	20180730_MV_JS_Wildermuth_Diurnal3_20180627ts_QE144_Ag683775-924_USHXG01062_POS_MSMS-v2_shoot-EON-Medicago-4-449-4c-S_IR01__019.h5	1.19	6	78.034,80.050,96.045,106.029,123.055,124.039	0.7249	[M+H]+	123.055	123.055	0.0001	1.1322	1.14	1.23	1.21	1.18	0.03	nicotinamide	0098_N-Acetyl-L-glutamic_acid_negative_M-H188p0564_15p00	9152.09	5748.88	10482.1	10779.2	6158.67	13204.4	4304.94	7532.78	339134	434638	494922
92	nicotinamide mononucleotide	yes	nicotinamide mononucleotide			C11H16N2O8P+	positive	335.064	DAYLJWODMCOQEW-TURQNECASA-O	1	1	1	3	Level 1+				perfect match to internal reference library	9289505	20180730_MV_JS_Wildermuth_Diurnal3_20180627ts_QE144_Ag683775-924_USHXG01062_POS_MSMS-v2_shoot-EOD-Brachy-1-433-3-S_IR01__055.h5	15.8594	20180730_MV_JS_Wildermuth_Diurnal3_20180627ts_QE144_Ag683775-924_USHXG01062_POS_MSMS-v2_root-EOD-Brachy-4-437-3-R_IR01__052.h5	15.91	2	97.029,123.056	0.957	[M]+	335.064	335.063	0.0008	2.3628	15.76	15.99	15.86	15.91	0.05	nicotinamide mononucleotide	0099_Glucuronic_Acid_negative_M-H193p0354_15p00	27917.4	10315.5	21461.1	27835.6	9300.52	25555.1	10186.7	23787	1880538	3.82521e+06	3963446
26	nicotinic acid and/or isonicotinic acid	yes	nicotinic acid	isonicotinic acid//nicotinic acid	TWBYWOBDOCUKOW-UHFFFAOYSA-N//PVNIIMVLHYAWGP-UHFFFAOYSA-N	C6H5NO2	positive	123.032	PVNIIMVLHYAWGP-UHFFFAOYSA-N	0	1	1	2	Level 1	nicotinic acid/isonicotinic acid unresolvable		multiple, unresolvable peaks	no ref match available or no MSMS collected	2.4079e+06	20180730_MV_JS_Wildermuth_Diurnal3_20180627ts_QE144_Ag683775-924_USHXG01062_POS_MSMS-v2_shoot-EOD-Brachy-2-434-3-S_IR01__040.h5	5.62464						[M+H]+	124.039	124.039	0.0002	1.2351	5.53	6.19	5.62	5.88	0.26	nicotinic acid and/or isonicotinic acid	0100_adenosine_5monophosphate_negative_M-H346p0558_15p19	0	0	0	0	0	0	0	0	339196	0	320272
59	o-acetyl-serine	yes	o-acetyl-serine			C5H9NO4	negative	147.053	VZXPDPZARILFQX-BYPYZUCNSA-N	0	1	1	2	Level 1				no ref match available or no MSMS collected	845606	20180730_MV_JS_Wildermuth_Diurnal3_20180627ts_QE144_Ag683775-924_USHXG01062_NEG_MSMS-v2_shoot-EOD-Brachy-1-433-3-S_IR02__056.h5	11.1486						[M-H]-	146.046	146.045	0.0011	7.821	11.09	11.34	11.15	11.2	0.05	o-acetyl-serine	0101_D-Glucosaminic_acid_negative_M-H194p0670_15p32	9498.85	4738.65	7806.28	9622.56	4833.72	5385.45	5045.97	4867.7	0	0	0
90	ophthalmic acid	yes	ophthalmic acid			C11H19N3O6	positive	289.127	JCMUOFQHZLPHQP-BQBZGAKWSA-N	1	1	1	3	Level 1+				perfect match to internal reference library	7836824	20180730_MV_JS_Wildermuth_Diurnal3_20180627ts_QE144_Ag683775-924_USHXG01062_POS_MSMS-v2_shoot-EOD-Brachy-1-433-3-S_IR01__055.h5	15.7826	20180730_MV_JS_Wildermuth_Diurnal3_20180627ts_QE144_Ag683775-924_USHXG01062_POS_MSMS-v2_shoot-EOD-Brachy-1-433-3-S_IR01__055.h5	15.93	10	58.066,86.097,96.996,98.993,161.092,170.064,202.984,215.102,272.079,290.090	0.604	[M+H]+	290.135	290.134	0.0006	2.1544	15.86	15.99	15.78	15.94	0.15	ophthalmic acid	0102_RAFFINOSE_negative_M-H503p1617_15p37	7791.2	4830.32	0	6758.49	3808.97	0	5672.36	0	4.888e+06	632857	6618262
119	ornithine	yes	ornithine			C5H12N2O2	negative	132.09	AHLPHDHHMVZTML-BYPYZUCNSA-N	1	1	1	3	Level 1+				perfect match to internal reference library	99927808	20180730_MV_JS_Wildermuth_Diurnal3_20180627ts_QE144_Ag683775-924_USHXG01062_NEG_MSMS-v2_shoot-EOD-Arabidopsis-2-452-3-S_IR02__095.h5	16.8578	20180730_MV_JS_Wildermuth_Diurnal3_20180627ts_QE144_Ag683775-924_USHXG01062_NEG_MSMS-v2_shoot-EON-Arabidopsis-5-455-4-S_IR02__264.h5	17.01	2	113.071,131.081	0.9709	[M-H]-	131.083	131.081	0.0013	9.7458	16.95	17.04	16.86	16.98	0.12	ornithine	0103_D-Glycerol_1-phosphate_negative_M-H171p0064_15p42	0	4853.68	0	5171.38	0	0	0	0	539182	651738	732767
38	orotic acid	yes	orotic acid			C5H4N2O4	negative	156.017	PXQPEWDEAKTCGB-UHFFFAOYSA-N	1	1	1	3	Level 1+				perfect match to internal reference library	10447024	20180730_MV_JS_Wildermuth_Diurnal3_20180627ts_QE144_Ag683775-924_USHXG01062_NEG_MSMS-v2_shoot-EOD-Brachy-2-434-3-S_IR02__041.h5	7.75896	20180730_MV_JS_Wildermuth_Diurnal3_20180627ts_QE144_Ag683775-924_USHXG01062_NEG_MSMS-v2_shoot-EOD-Arabidopsis-4-454-3-S_IR02__074.h5	7.66	2	111.019,155.009	0.9874	[M-H]-	155.01	155.009	0.0011	7.3655	7.4	7.86	7.76	7.62	0.14	orotic acid	0104_L-2-Aminoadipic_acid_negative_M-H160p0615_15p70	20009.1	5986.17	9222.44	19941	3824.87	15290.9	7561.52	9569.83	2548670	8962807	3.26764e+06
36	pantothenic acid	yes	pantothenic acid			C9H17NO5	negative	219.111	GHOKWGTUZJEAQD-ZETCQYMHSA-N	1	1	1	3	Level 1+				perfect match to internal reference library	35731452	20180730_MV_JS_Wildermuth_Diurnal3_20180627ts_QE144_Ag683775-924_USHXG01062_NEG_MSMS-v2_shoot-EON-Medicago-2-444-4b-S_IR02_rerun_213.h5	6.88179	20180730_MV_JS_Wildermuth_Diurnal3_20180627ts_QE144_Ag683775-924_USHXG01062_NEG_MSMS-v2_shoot-EON-Brachy-3-436-4-S_IR02_rerun_240.h5	6.59	4	71.012,88.039,146.081,218.103	0.8875	[M-H]-	218.103	218.103	0.0006	2.5467	6.02	7.38	6.88	6.93	0.05	pantothenic acid	0105_L-glutamic_acid_negative_M-H146p0459_15p77	489117	181233	389821	529667	194797	448348	179825	214645	52993852	148172160	168923456
44	phenylalanine	yes	phenylalanine			C9H11NO2	negative	165.079	COLNVLDHVKWLRT-QMMMGPOBSA-N	1	1	1	3	Level 1+				perfect match to internal reference library	156403648	20180730_MV_JS_Wildermuth_Diurnal3_20180627ts_QE144_Ag683775-924_USHXG01062_NEG_MSMS-v2_shoot-EON-Brachy-2-434-4-S_IR02__068.h5	8.88155	20180730_MV_JS_Wildermuth_Diurnal3_20180627ts_QE144_Ag683775-924_USHXG01062_NEG_MSMS-v2_shoot-EON-Brachy-3-436-4-S_IR02_rerun_240.h5	9.06	3	72.008,147.044,164.071	0.8889	[M-H]-	164.072	164.071	0.0011	6.5732	8.88	9.38	8.88	9.08	0.2	phenylalanine	0106_glutathione_negative_M-H306p0765_15p86	0	0	0	0	0	0	0	0	24199.8	42510.3	22450.2
55	pipecolic acid	yes	pipecolic acid			C6H11NO2	positive	129.079	HXEACLLIILLPRG-YFKPBYRVSA-N	1	1	1	3	Level 1+				perfect match to internal reference library	94743288	20180730_MV_JS_Wildermuth_Diurnal3_20180627ts_QE144_Ag683775-924_USHXG01062_POS_MSMS-v2_shoot-EON-Medicago-2-444-4b-S_IR01_rerun_212.h5	10.851	20180730_MV_JS_Wildermuth_Diurnal3_20180627ts_QE144_Ag683775-924_USHXG01062_POS_MSMS-v2_root-EON-Medicago-1-442-4c-R_IR01_rerun_254.h5	11.03	2	84.081,130.086	0.9749	[M+H]+	130.086	130.086	0.0001	0.6965	10.93	11.2	10.85	11.09	0.24	pipecolic acid	0107_Neuberg_ester_negative_M-H259p0224_15p95	55074.9	46801.8	29956.4	59276.7	57402.3	66171.5	53228	41386.4	14379517	4687960	9225634
54	proline	yes	proline			C5H9NO2	positive	115.063	ONIBWKKTOPOVIA-BYPYZUCNSA-N	1	1	1	3	Level 1+				perfect match to internal reference library	142387136	20180730_MV_JS_Wildermuth_Diurnal3_20180627ts_QE144_Ag683775-924_USHXG01062_POS_MSMS-v2_shoot-EON-Arabidopsis-3-453-4-S_IR01__272.h5	10.8024	20180730_MV_JS_Wildermuth_Diurnal3_20180627ts_QE144_Ag683775-924_USHXG01062_POS_MSMS-v2_shoot-EON-Arabidopsis-3-453-4-S_IR01__272.h5	10.98	2	70.066,116.071	0.9832	[M+H]+	116.071	116.071	0.0001	0.5248	10.82	11.17	10.8	10.99	0.19	proline	0108_56-84-8_negative_M-H132p0302_15p96	335868	106881	253854	435954	63870.1	153757	106573	95921.7	12600645	43741340	53646508
102	putrescine	yes	putrescine			C4H12N2	positive	88.1	KIDHWZJUCRJVML-UHFFFAOYSA-N	1	1	1	3	Level 1+				perfect match to internal reference library	1.39061e+06	20180730_MV_JS_Wildermuth_Diurnal3_20180627ts_QE144_Ag683775-924_USHXG01062_POS_MSMS-v2_shoot-EOD-Brachy-4-437-3-S_IR01__028.h5	17.0481	20180730_MV_JS_Wildermuth_Diurnal3_20180627ts_QE144_Ag683775-924_USHXG01062_POS_MSMS-v2_shoot-EOD-Brachy-4-437-3-S_IR01__028.h5	17.21	1	72.082	0	[M+H]+	89.1073	89.1076	0.0003	3.3241	17.11	17.55	17.05	17.16	0.11	putrescine	0109_UDP-GlcNAc_negative_M-H606p0743_16p17	0	0	0	0	0	0	0	0	2159837	1.19333e+06	1.70877e+06
50	pyridoxamine	yes	pyridoxamine			C8H12N2O2	positive	168.09	NHZMQXZHNVQTQA-UHFFFAOYSA-N	0.5	1	1	2.5	Level 1+				partial match of fragments	4.13936e+06	20180730_MV_JS_Wildermuth_Diurnal3_20180627ts_QE144_Ag683775-924_USHXG01062_POS_MSMS-v2_root-EON-Arabidopsis-6-456-4-R_IR01_rerun_191.h5	9.99762	20180730_MV_JS_Wildermuth_Diurnal3_20180627ts_QE144_Ag683775-924_USHXG01062_POS_MSMS-v2_shoot-EON-Medicago-4-449-4c-S_IR01__019.h5	9.94	2	134.061,152.070	0.621	[M+H]+	169.097	169.097	0.0003	1.6197	9.81	10.25	10	9.95	0.04	pyridoxamine	0110_UDP-N-acetyl-D-galactosamine_negative_M-H606p0743_16p20	0	0	0	0	0	0	0	0	2159837	1.19333e+06	1.70877e+06
8	pyridoxine	yes	pyridoxine			C8H11NO3	positive	169.074	LXNHXLLTXMVWPM-UHFFFAOYSA-N	0	1	1	2	Level 1				no ref match available or no MSMS collected	38281184	20180730_MV_JS_Wildermuth_Diurnal3_20180627ts_QE144_Ag683775-924_USHXG01062_POS_MSMS-v2_shoot-EOD-Brachy-2-434-3-S_IR01__040.h5	2.12408	20180730_MV_JS_Wildermuth_Diurnal3_20180627ts_QE144_Ag683775-924_USHXG01062_POS_MSMS-v2_shoot-EOD-Medicago-2-442-3b-S_IR01_rerun_206.h5	2.19	4	124.076,134.060,152.071,170.081	0.8478	[M+H]+	170.081	170.081	0.0004	2.421	2	2.4	2.12	2.16	0.03	pyridoxine	0111_fumaric_acid_negative_M-H115p0037_16p33	67471.8	17190.8	49314.4	57055.6	12608.8	29373.2	18031.2	19285	990716	2801285	3.94695e+06
29	pyruvic acid	yes	pyruvic acid			C3H4O3	negative	88.016	LCTONWCANYUPML-UHFFFAOYSA-N	0.5	1	1	2.5	Level 1+				partial match of fragments	3.63101e+06	20180730_MV_JS_Wildermuth_Diurnal3_20180627ts_QE144_Ag683775-924_USHXG01062_NEG_MSMS-v2_shoot-EON-Brachy-5-438-4-S_IR02_rerun_234.h5	6.13773	20180730_MV_JS_Wildermuth_Diurnal3_20180627ts_QE144_Ag683775-924_USHXG01062_NEG_MSMS-v2_shoot-EON-Brachy-5-438-4-S_IR02_rerun_234.h5	5.87	1	87.007	0	[M-H]-	87.0087	87.0072	0.0015	17.4441	5.72	6.14	6.14	5.9	0.24	pyruvic acid	0112_galactose-1-phosphate_negative_M-H259p0224_16p37	9080.51	8560.14	8025.66	9975.37	4829.55	11561.8	8011.45	0	4946885	1.62493e+06	2.81063e+06
68	quinic acid	yes	quinic acid			C7H12O6	negative	192.063	AAWZDTNXLSGCEK-LNVDRNJUSA-N	1	1	1	3	Level 1+				perfect match to internal reference library	91249784	20180730_MV_JS_Wildermuth_Diurnal3_20180627ts_QE144_Ag683775-924_USHXG01062_NEG_MSMS-v2_shoot-EOD-Brachy-3-436-3-S_IR02__285.h5	13.023	20180730_MV_JS_Wildermuth_Diurnal3_20180627ts_QE144_Ag683775-924_USHXG01062_NEG_MSMS-v2_root-EON-Arabidopsis-5-455-4-R_IR02__023.h5	13.09	2	85.028,191.055	0.9388	[M-H]-	191.056	191.055	0.0009	4.7429	12.82	13.28	13.02	13	0.03	quinic acid	0113_UDP-D-glucose_negative_M-H565p0477_16p43	0	0	0	0	0	0	0	0	8557722	2.02011e+06	3436019
19	riboflavin	yes	riboflavin			C17H20N4O6	positive	376.138	AUNGANRZJHBGPY-SCRDCRAPSA-N	1	1	1	3	Level 1+				perfect match to internal reference library	15787674	20180730_MV_JS_Wildermuth_Diurnal3_20180627ts_QE144_Ag683775-924_USHXG01062_POS_MSMS-v2_shoot-EON-Medicago-4-449-4c-S_IR01__019.h5	4.50626	20180730_MV_JS_Wildermuth_Diurnal3_20180627ts_QE144_Ag683775-924_USHXG01062_POS_MSMS-v2_shoot-EOD-Medicago-4-449-3a-S_IR01__100.h5	4.54	15	57.034,61.029,69.034,71.013,71.050,75.044,81.034,99.044,117.055,172.087,200.082,216.077,243.088,359.136,377.146	0.8884	[M+H]+	377.146	377.144	0.0011	2.9354	4.03	4.72	4.51	4.44	0.07	riboflavin	0114_Robison_ester_negative_M-H259p0224_16p57	9080.51	8560.14	8025.66	9975.37	4829.55	11561.8	8011.45	0	4946885	1.62493e+06	2.81063e+06
79	S-(5'-adenosyl)-homocysteine	yes	S-(5'-adenosyl)-homocysteine			C14H20N6O5S	positive	384.122	ZJUKTBDSGOFHSH-WFMPWKQPSA-N	1	1	1	3	Level 1+				perfect match to internal reference library	1.56056e+06	20180730_MV_JS_Wildermuth_Diurnal3_20180627ts_QE144_Ag683775-924_USHXG01062_POS_MSMS-v2_shoot-EOD-Arabidopsis-3-453-3-S_IR01__269.h5	14.2983	20180730_MV_JS_Wildermuth_Diurnal3_20180627ts_QE144_Ag683775-924_USHXG01062_POS_MSMS-v2_shoot-EON-Arabidopsis-1-451-4-S_IR01__037.h5	14.48	5	88.022,134.027,136.062,250.073,385.130	0.8596	[M+H]+	385.129	385.128	0.0011	2.7414	14.39	14.55	14.3	14.45	0.15	S-(5'-adenosyl)-homocysteine	0115_L-Carnosine_negative_M-H225p0993_16p76	7557.81	4088.16	5179.29	8028.44	7330.49	6713.31	0	0	22706.1	40317.2	9079.77
97	S-(5'-adenosyl)-methionine	yes	S-(5'-adenosyl)-methionine			C15H23N6O5S+	positive	399.145	MEFKEPWMEQBLKI-AIRLBKTGSA-O	1	1	1	3	Level 1+				perfect match to internal reference library	6.33215e+06	20180730_MV_JS_Wildermuth_Diurnal3_20180627ts_QE144_Ag683775-924_USHXG01062_POS_MSMS-v2_shoot-EOD-Brachy-4-437-3-S_IR01__028.h5	16.8163	20180730_MV_JS_Wildermuth_Diurnal3_20180627ts_QE144_Ag683775-924_USHXG01062_POS_MSMS-v2_shoot-EOD-Medicago-1-442-3a-S_IR01__103.h5	16.96	7	97.029,102.055,136.062,250.093,264.091,298.097,399.142	0.8017	[M]+	399.144	399.144	0.001	2.5947	16.91	17.06	16.82	16.96	0.14	S-(5'-adenosyl)-methionine	0116_L-arginine_negative_M-H173p1044_16p76	70754.6	39873.6	76617.7	78309.3	34061.4	107067	66896.7	35253.4	988817	15777125	2552130
12	salicylic acid	yes	salicylic acid			C7H6O3	negative	138.032	YGSDEFSMJLZEOE-UHFFFAOYSA-N	1	1	1	3	Level 1+				co-isolated precursor but all reference ions are in sample spectrum	169566320	20180730_MV_JS_Wildermuth_Diurnal3_20180627ts_QE144_Ag683775-924_USHXG01062_NEG_MSMS-v2_shoot-EON-Brachy-5-438-4-S_IR02_rerun_234.h5	2.16737	20180730_MV_JS_Wildermuth_Diurnal3_20180627ts_QE144_Ag683775-924_USHXG01062_NEG_MSMS-v2_shoot-EON-Brachy-5-438-4-S_IR02_rerun_234.h5	2.39	2	93.033,137.023	0.7426	[M-H]-	137.024	137.023	0.0013	9.7779	2.16	2.67	2.17	2.33	0.17	salicylic acid	0117_L-lysine_negative_M-H145p0982_16p83	56966.4	41818.6	57074.6	53473.6	20179.8	24432	39345.2	10700.7	561960	5.03053e+06	1.30661e+06
85	serine	yes	serine			C3H7NO3	negative	105.043	MTCFGRXMJLQNBG-REOHCLBHSA-N	1	1	1	3	Level 1+				perfect match to internal reference library	56947456	20180730_MV_JS_Wildermuth_Diurnal3_20180627ts_QE144_Ag683775-924_USHXG01062_NEG_MSMS-v2_shoot-EON-Brachy-5-438-4-S_IR02_rerun_234.h5	14.17	20180730_MV_JS_Wildermuth_Diurnal3_20180627ts_QE144_Ag683775-924_USHXG01062_NEG_MSMS-v2_shoot-EOD-Brachy-5-438-3-S_IR02_rerun_349.h5	14.19	3	72.008,74.023,104.034	0.9031	[M-H]-	104.035	104.034	0.0015	14.1469	14.13	14.34	14.17	14.23	0.06	serine	0118_UDP-D-glucose_negative_M-H565p0477_16p85	0	0	0	0	0	0	0	0	8557722	2.02011e+06	3436019
77	shikimic acid and or isomers	yes	shikimic acid			C7H10O5	negative	174.053	JXOHGGNKMLTUBP-HSUXUTPPSA-N	1	1	1	3	Level 1+			multiple, unresolvable peaks	perfect match to internal reference library	10098565	20180730_MV_JS_Wildermuth_Diurnal3_20180627ts_QE144_Ag683775-924_USHXG01062_NEG_MSMS-v2_shoot-EON-Brachy-5-438-4-S_IR02_rerun_234.h5	13.595	20180730_MV_JS_Wildermuth_Diurnal3_20180627ts_QE144_Ag683775-924_USHXG01062_NEG_MSMS-v2_shoot-EOD-Arabidopsis-1-451-3-S_IR02_rerun_343.h5	13.34	9	71.012,73.028,93.033,99.007,111.044,137.023,154.946,155.034,173.045	0.6969	[M-H]-	173.046	173.044	0.001	5.7023	13.28	13.65	13.6	13.39	0.21	shikimic acid and or isomers	0119_L-ornithine_negative_M-H131p0826_16p86	15242	7615.79	10683.4	12118.2	12577	11575.8	7458.23	9445.11	23121.2	164012	24999.3
83	sn-glycero-3-phosphocholine	yes	sn-glycero-3-phosphocholine			C8H21NO6P+	positive	258.11	SUHOQUVVVLNYQR-MRVPVSSYSA-O	1	1	1	3	Level 1+				perfect match to internal reference library	359583232	20180730_MV_JS_Wildermuth_Diurnal3_20180627ts_QE144_Ag683775-924_USHXG01062_POS_MSMS-v2_shoot-EOD-Brachy-1-433-3-S_IR01__055.h5	14.7601	20180730_MV_JS_Wildermuth_Diurnal3_20180627ts_QE144_Ag683775-924_USHXG01062_POS_MSMS-v2_shoot-EOD-Arabidopsis-3-453-3-S_IR01__269.h5	14.95	6	60.082,86.097,104.108,125.000,184.074,258.110	0.9511	[M]+	258.11	258.11	0.0005	1.7881	14.91	15.12	14.76	15	0.24	sn-glycero-3-phosphocholine	0120_2-Phospho-D-Glyceric_Acid_negative_M-H184p9856_16p92	48578.5	33421.4	24510.6	19555.6	8219.33	0	31212.5	0	59818.1	27008.2	50644.2
16	sphinganine	yes	sphinganine			C18H39NO2	positive	301.298	OTKJDMGTUTTYMP-ZWKOTPCHSA-N	0	1	1	2	Level 1				no ref match available or no MSMS collected	2198182	20180730_MV_JS_Wildermuth_Diurnal3_20180627ts_QE144_Ag683775-924_USHXG01062_POS_MSMS-v2_shoot-EOD-Medicago-5-449-3b-S_IR01_rerun_221.h5	4.10651						[M+H]+	302.305	302.305	0.0009	2.942	3.61	4.15	4.11	3.83	0.28	sphinganine	0000_methyl_21H-indol-3-yl_acetate_positive_M+H190p0863_1p17	8910.54	20953.2	20267.5	12395.8	35284.5	22206.2	11941	12878.3	347230	192118	105995
8	syringic acid	yes	syringic acid			C9H10O5	negative	198.053	JMSVCTWVEWCHDZ-UHFFFAOYSA-N	1	1	1	3	Level 1+				perfect match to internal reference library	5949980	20180730_MV_JS_Wildermuth_Diurnal3_20180627ts_QE144_Ag683775-924_USHXG01062_NEG_MSMS-v2_shoot-EON-Brachy-5-438-4-S_IR02_rerun_234.h5	1.58523	20180730_MV_JS_Wildermuth_Diurnal3_20180627ts_QE144_Ag683775-924_USHXG01062_NEG_MSMS-v2_shoot-EON-Brachy-5-438-4-S_IR02_rerun_234.h5	1.5	7	121.028,123.007,138.031,153.055,166.997,182.021,197.044	0.7968	[M-H]-	197.046	197.045	0.0008	4.3014	1.39	1.76	1.59	1.56	0.03	syringic acid	0001_nicotinamide_positive_M+H123p0553_1p21	213625	635198	550768	476873	996493	998753	900091	773936	4580491	6408473	5632929
73	threonine/allothreonine	yes	threonine	allothreonine//threonine	AYFVYJQAPQTCCC-HRFVKAFMSA-N//AYFVYJQAPQTCCC-GBXIJSLDSA-N	C4H9NO3	negative	119.058	AYFVYJQAPQTCCC-GBXIJSLDSA-N	1	1	1	3	Level 1+	threonine/allothreonine unresolvable, homoserine resolvable			co-isolated precursor but all reference ions are in sample spectrum	107486296	20180730_MV_JS_Wildermuth_Diurnal3_20180627ts_QE144_Ag683775-924_USHXG01062_NEG_MSMS-v2_shoot-EON-Brachy-5-438-4-S_IR02_rerun_234.h5	13.3461	20180730_MV_JS_Wildermuth_Diurnal3_20180627ts_QE144_Ag683775-924_USHXG01062_NEG_MSMS-v2_shoot-EOD-Brachy-6-439-3-S_IR02__107.h5	13.37	3	72.008,74.023,118.050	0.8494	[M-H]-	118.051	118.05	0.0014	11.5915	13.28	13.51	13.35	13.39	0.05	threonine/allothreonine	0002_N-Acetyl-5-hydroxytryptamine_positive_M+H219p1128_1p29	25196.8	26139.8	23861.9	28891.2	26910.8	29316	25221.2	29928.1	98114.5	98668.7	56339.2
2	thymine	yes	thymine			C5H6N2O2	negative	126.043	RWQNBRDOKXIBIV-UHFFFAOYSA-N	0	1	1	2	Level 1				no ref match available or no MSMS collected	368021	20180730_MV_JS_Wildermuth_Diurnal3_20180627ts_QE144_Ag683775-924_USHXG01062_NEG_MSMS-v2_shoot-EOD-Medicago-2-442-3b-S_IR02_rerun_207.h5	1.23578						[M-H]-	125.036	125.034	0.0014	11.0113	1.1	1.15	1.24	1.13	0.1	thymine	0003_indole-3-acetic_acid_positive_M+H176p0706_1p47	21021.8	11536.6	18647.8	28147.7	10720.7	17071.4	11322.8	9502.39	731593	415393	316930
42	trigonelline	yes	trigonelline			C7H8NO2+	positive	138.055	WWNNZCOKKKDOPX-UHFFFAOYSA-O	0	1	1	2	Level 1				no ref match available or no MSMS collected	1253369344	20180730_MV_JS_Wildermuth_Diurnal3_20180627ts_QE144_Ag683775-924_USHXG01062_POS_MSMS-v2_shoot-EOD-Medicago-5-449-3b-S_IR01_rerun_221.h5	8.67885	20180730_MV_JS_Wildermuth_Diurnal3_20180627ts_QE144_Ag683775-924_USHXG01062_POS_MSMS-v2_shoot-EON-Brachy-2-434-4-S_IR01__067.h5	9.21	5	92.050,94.066,96.045,110.060,138.055	0.9407	[M]+	138.055	138.055	0.0002	1.5657	8.95	9.25	8.68	9.1	0.42	trigonelline	0004_Methylthioadenosine_positive_M+H298p0969_1p61	0	0	0	13381.3	0	15600.5	8805.68	0	14850803	11322725	10769000
102	trisaccharide (ex. raffinose)	yes	raffinose			C18H32O16	negative	504.169	MUPFEKGTMRGPLJ-ZQSKZDJDSA-N	1	1	1	3	Level 1+				perfect match to internal reference library	34046560	20180730_MV_JS_Wildermuth_Diurnal3_20180627ts_QE144_Ag683775-924_USHXG01062_NEG_MSMS-v2_shoot-EOD-Brachy-1-433-3-S_IR02__056.h5	15.3683	20180730_MV_JS_Wildermuth_Diurnal3_20180627ts_QE144_Ag683775-924_USHXG01062_NEG_MSMS-v2_root-EON-Arabidopsis-6-456-4-R_IR02_rerun_192.h5	15.37	24	58.004,59.012,71.012,72.992,73.028,83.012,85.028,87.007,89.023,95.012,101.023,113.023,119.033,125.023,131.034,143.034,149.045,161.044,179.055,221.066,281.086,323.099,341.110,503.162	0.8634	[M-H]-	503.162	503.162	0.0004	0.7967	15.32	15.49	15.37	15.39	0.02	trisaccharide (ex. raffinose)	0005_5deoxyadenosine_positive_M+H252p1091_1p77	26173.5	10213.7	0	18531.1	37775.1	20164.5	11897.1	18594.9	4.76168e+06	4667728	7002043
23	tryptamine	yes	tryptamine			C10H12N2	positive	160.1	APJYDQYYACXCRM-UHFFFAOYSA-N	0	1	1	2	Level 1				no ref match available or no MSMS collected	1.06561e+06	20180730_MV_JS_Wildermuth_Diurnal3_20180627ts_QE144_Ag683775-924_USHXG01062_POS_MSMS-v2_shoot-EOD-Brachy-1-433-3-S_IR01__055.h5	5.48265						[M+H]+	161.107	161.107	0.0002	1.4097	5.24	5.67	5.48	5.42	0.06	tryptamine	0006_d-Dethiobiotin_positive_M+H215p1390_1p95	72646.7	15669.7	39420.6	55155.5	25060.3	56103.9	28355	47301.3	0	74574.8	0
51	tryptophan	yes	tryptophan			C11H12N2O2	positive	204.09	QIVBCDIJIAJPQS-SECBINFHSA-N	1	1	1	3	Level 1+				perfect match to internal reference library	47188484	20180730_MV_JS_Wildermuth_Diurnal3_20180627ts_QE144_Ag683775-924_USHXG01062_POS_MSMS-v2_shoot-EON-Medicago-2-444-4b-S_IR01_rerun_212.h5	10.0481	20180730_MV_JS_Wildermuth_Diurnal3_20180627ts_QE144_Ag683775-924_USHXG01062_POS_MSMS-v2_shoot-EON-Medicago-4-449-4c-S_IR01__019.h5	10.16	2	146.060,188.071	0.8628	[M+H]+	205.097	205.097	0.0003	1.6835	10	10.32	10.05	10.16	0.11	tryptophan	0007_D-Glucurono-3_6-lactone_positive_M+NH4194p0659_2p04	0	11198.6	0	0	10684.5	0	0	0	695930	2.54848e+06	1.6781e+06
36	tyramine and or isomers	yes	tyramine			C8H11NO	positive	137.084	DZGWFCGJZKJUFP-UHFFFAOYSA-N	1	1	1	3	Level 1+			multiple, unresolvable peaks	perfect match to internal reference library	26757888	20180730_MV_JS_Wildermuth_Diurnal3_20180627ts_QE144_Ag683775-924_USHXG01062_POS_MSMS-v2_root-EON-Brachy-5-438-4-R_IR01_rerun_345.h5	6.92473	20180730_MV_JS_Wildermuth_Diurnal3_20180627ts_QE144_Ag683775-924_USHXG01062_POS_MSMS-v2_root-EOD-Brachy-6-439-3-R_IR01_rerun_197.h5	7.19	3	93.070,103.055,121.065	0.9315	[M+H]+	138.091	138.091	0.0003	2.4973	6.42	7.42	6.92	6.95	0.03	tyramine and or isomers	0008_pyridoxine_positive_M+H170p0812_2p12	30742.1	19645.4	21640.8	21895.7	56080.8	26915.4	18381.8	30431.6	3.50475e+06	4410835	2.92568e+06
63	tyrosine	yes	tyrosine			C9H11NO3	negative	181.074	OUYCCCASQSFEME-QMMMGPOBSA-N	1	1	1	3	Level 1+				perfect match to internal reference library	33867884	20180730_MV_JS_Wildermuth_Diurnal3_20180627ts_QE144_Ag683775-924_USHXG01062_NEG_MSMS-v2_shoot-EON-Brachy-2-434-4-S_IR02__068.h5	11.7282	20180730_MV_JS_Wildermuth_Diurnal3_20180627ts_QE144_Ag683775-924_USHXG01062_NEG_MSMS-v2_shoot-EON-Brachy-5-438-4-S_IR02_rerun_234.h5	11.72	6	72.008,74.023,93.033,119.049,163.039,180.066	0.9327	[M-H]-	180.067	180.066	0.001	5.3786	11.67	11.99	11.73	11.82	0.09	tyrosine	0009_2deoxyadenosine_positive_M+H252p1091_2p20	26173.5	10213.7	0	18531.1	37775.1	20164.5	11897.1	18594.9	4.76168e+06	4667728	7002043
4	uracil	yes	uracil			C4H4N2O2	negative	112.027	ISAKRJDGNUQOIC-UHFFFAOYSA-N	1	1	1	3	Level 1+				co-isolated precursor but all reference ions are in sample spectrum	12889991	20180730_MV_JS_Wildermuth_Diurnal3_20180627ts_QE144_Ag683775-924_USHXG01062_NEG_MSMS-v2_shoot-EON-Arabidopsis-4-454-4-S_IR02_rerun_195.h5	1.37285	20180730_MV_JS_Wildermuth_Diurnal3_20180627ts_QE144_Ag683775-924_USHXG01062_NEG_MSMS-v2_shoot-EON-Arabidopsis-4-454-4-S_IR02_rerun_195.h5	1.34	2	110.974,111.019	0.6458	[M-H]-	111.02	111.019	0.0014	12.8656	1.28	1.43	1.37	1.34	0.04	uracil	0010_adenine_positive_M+H136p0618_2p52	290346	202125	215934	312015	378597	538039	283994	320023	905708160	1141938432	943254912
58	uric acid and or isomers	yes	uric acid			C5H4N4O3	negative	168.028	LEHOTFFKMJEONL-UHFFFAOYSA-N	1	1	1	3	Level 1+			multiple, unresolvable peaks	perfect match to internal reference library	16903802	20180730_MV_JS_Wildermuth_Diurnal3_20180627ts_QE144_Ag683775-924_USHXG01062_NEG_MSMS-v2_root-EON-Arabidopsis-1-451-4-R_IR02__077.h5	11.0305	20180730_MV_JS_Wildermuth_Diurnal3_20180627ts_QE144_Ag683775-924_USHXG01062_NEG_MSMS-v2_root-EOD-Arabidopsis-3-453-3-R_IR02_rerun_355.h5	10.74	9	69.008,79.956,96.019,97.003,124.014,142.025,148.973,166.983,167.020	0.8812	[M-H]-	167.021	167.02	0.0011	6.473	10.68	11.13	11.03	10.83	0.2	uric acid and or isomers	0011_biliverdin_positive_M+H583p2551_2p59	0	0	0	0	0	0	0	0	460147	295565	168868
16	uridine	yes	uridine			C9H12N2O6	negative	244.07	DRTQHJPVMGBUCF-XVFCMESISA-N	0.5	1	1	2.5	Level 1+				partial match of fragments	34306472	20180730_MV_JS_Wildermuth_Diurnal3_20180627ts_QE144_Ag683775-924_USHXG01062_NEG_MSMS-v2_shoot-EON-Brachy-5-438-4-S_IR02_rerun_234.h5	2.85292	20180730_MV_JS_Wildermuth_Diurnal3_20180627ts_QE144_Ag683775-924_USHXG01062_NEG_MSMS-v2_root-EON-Medicago-1-442-4c-R_IR02_rerun_255.h5	2.55	3	110.024,200.056,243.062	0.6509	[M-H]-	243.062	243.062	0.0003	1.3723	2.47	3	2.85	2.73	0.12	uridine	0012_uridine_positive_M+H245p0768_2p87	0	6600.24	0	0	0	0	0	0	156931	389091	161749
109	uridine 5'-diphospho-N-acetylhexosamine	yes	uridine 5'-diphospho-N-acetylglucosamine	uridine 5'-diphospho-N-acetylgalactosamine//uridine 5'-diphospho-N-acetylglucosamine	LFTYTUAZOPRMMI-FTFHWYEPSA-N//LFTYTUAZOPRMMI-CFRASDGPSA-N	C17H27N3O17P2	negative	607.082	LFTYTUAZOPRMMI-CFRASDGPSA-N	1	1	1	3	Level 1+	unresolvable isomers		multiple, unresolvable peaks	perfect match to internal reference library	11607730	20180730_MV_JS_Wildermuth_Diurnal3_20180627ts_QE144_Ag683775-924_USHXG01062_NEG_MSMS-v2_shoot-EON-Brachy-6-439-4-S_IR02__294.h5	16.1675	20180730_MV_JS_Wildermuth_Diurnal3_20180627ts_QE144_Ag683775-924_USHXG01062_NEG_MSMS-v2_root-EON-Arabidopsis-1-451-4-R_IR02__077.h5	16.26	16	78.957,96.968,111.018,158.924,174.979,176.935,260.957,272.957,282.038,300.048,305.017,323.028,362.004,384.984,402.993,606.075	0.9092	[M-H]-	606.074	606.075	0.0004	0.7246	16.17	16.38	16.17	16.26	0.1	uridine 5'-diphospho-N-acetylhexosamine	0013_4-Acetamidobutyric_acid_positive_M+H146p0812_2p97	41904.9	22392.9	48276.1	61599.3	22716	49667.7	22531.2	105990	212783	148842	321311
113	uridine 5'-diphosphohexose	yes	uridine 5'-diphosphogalactose	uridine 5'-diphosphogalactose//uridine 5'-diphosphogalactose	HSCJRCZFDFQWRP-WBRQRZOHSA-N//HSCJRCZFDFQWRP-WBRQRZOHSA-N		negative	566.055	HSCJRCZFDFQWRP-WBRQRZOHSA-N	1	1	1	3	Level 1+	unresolvable isomers			perfect match to internal reference library	14297139	20180730_MV_JS_Wildermuth_Diurnal3_20180627ts_QE144_Ag683775-924_USHXG01062_NEG_MSMS-v2_root-EON-Arabidopsis-1-451-4-R_IR02__077.h5	16.4292	20180730_MV_JS_Wildermuth_Diurnal3_20180627ts_QE144_Ag683775-924_USHXG01062_NEG_MSMS-v2_shoot-EON-Arabidopsis-6-456-4-S_IR02__071.h5	16.45	15	78.958,96.968,111.019,138.979,150.979,158.924,211.000,241.011,272.957,305.017,320.978,323.029,384.986,402.993,565.048	0.8492	[M-H]-	565.048	565.048	0.0004	0.6316	16.35	16.61	16.43	16.44	0.01	uridine 5'-diphosphohexose	0014_adenosine_positive_M+H268p1041_3p02	352705	196721	236870	325288	223039	190001	208147	84466.6	144254960	60719048	240905776
98	uridine 5'-diphosphoric acid and or isomers	yes	uridine 5'-diphosphoric acid			C9H14N2O12P2	positive	404.002	XCCTYIAWTASOJW-XVFCMESISA-N	0.5	1	1	2.5	Level 1+			multiple, unresolvable peaks	partial match of fragments	2192200	20180730_MV_JS_Wildermuth_Diurnal3_20180627ts_QE144_Ag683775-924_USHXG01062_POS_MSMS-v2_shoot-EOD-Arabidopsis-4-454-3-S_IR01__073.h5	16.8238	20180730_MV_JS_Wildermuth_Diurnal3_20180627ts_QE144_Ag683775-924_USHXG01062_POS_MSMS-v2_shoot-EOD-Arabidopsis-2-452-3-S_IR01__094.h5	16.46	1	97.029	0	[M+H]+	405.01	405.009	0.0009	2.299	16.29	16.66	16.82	16.44	0.38	uridine 5'-diphosphoric acid and or isomers	0015_hypoxanthine_positive_M+H137p0458_3p04	139149	53973	63380.1	114392	232612	72949.8	47287.6	91157.2	8694130	7.5504e+06	4886589
95	uridine-5-monophosphoric acid	yes	uridine-5-monophosphoric acid			C9H13N2O9P	negative	324.036	DJJCXFVJDGTHFX-XVFCMESISA-N	1	1	1	3	Level 1+				perfect match to internal reference library	4226787	20180730_MV_JS_Wildermuth_Diurnal3_20180627ts_QE144_Ag683775-924_USHXG01062_NEG_MSMS-v2_shoot-EOD-Arabidopsis-6-456-3-S_IR02__035.h5	14.8048	20180730_MV_JS_Wildermuth_Diurnal3_20180627ts_QE144_Ag683775-924_USHXG01062_NEG_MSMS-v2_shoot-EOD-Brachy-3-436-3-S_IR02__285.h5	14.74	9	78.958,96.968,111.018,138.979,150.979,192.990,211.001,280.022,323.029	0.9151	[M-H]-	323.029	323.029	0.0001	0.4199	14.55	15.18	14.8	14.78	0.03	uridine-5-monophosphoric acid	0016_Sphinganine_positive_M+H302p3054_4p11	33977	28948.6	34203.7	48499.9	30866.1	36336.5	34665.5	31424.3	1849695	773257	1.12122e+06
57	valine	yes	valine	norvaline//valine	SNDPXSYFESPGGJ-BYPYZUCNSA-N//KZSNJWFQEVHDMF-BYPYZUCNSA-N	C5H11NO2	negative	117.079	KZSNJWFQEVHDMF-BYPYZUCNSA-N	1	1	1	3	Level 1+				co-isolated precursor but all reference ions are in sample spectrum	206603856	20180730_MV_JS_Wildermuth_Diurnal3_20180627ts_QE144_Ag683775-924_USHXG01062_NEG_MSMS-v2_shoot-EON-Brachy-3-436-4-S_IR02_rerun_240.h5	10.9966	20180730_MV_JS_Wildermuth_Diurnal3_20180627ts_QE144_Ag683775-924_USHXG01062_NEG_MSMS-v2_shoot-EOD-Brachy-2-434-3-S_IR02__041.h5	11.09	2	116.070,116.927	0.8516	[M-H]-	116.072	116.07	0.0014	11.7233	10.9	11.29	11	11.06	0.07	valine	0017_choline_positive_M104p1070_4p11	1.59854e+06	781390	2.03015e+06	2595360	477623	4.48846e+06	696201	788924	2148268800	3661896704	3107641344
7	vanillic acid	yes	vanillic acid			C8H8O4	negative	168.042	WKOLLVMJNQIZCI-UHFFFAOYSA-N	1	1	1	3	Level 1+				co-isolated precursor but all reference ions are in sample spectrum	6232494	20180730_MV_JS_Wildermuth_Diurnal3_20180627ts_QE144_Ag683775-924_USHXG01062_NEG_MSMS-v2_shoot-EON-Brachy-3-436-4-S_IR02_rerun_240.h5	1.53499	20180730_MV_JS_Wildermuth_Diurnal3_20180627ts_QE144_Ag683775-924_USHXG01062_NEG_MSMS-v2_shoot-EOD-Brachy-5-438-3-S_IR02_rerun_349.h5	1.4	4	108.020,123.044,152.010,167.034	0.7275	[M-H]-	167.035	167.034	0.001	6.0179	1.33	1.66	1.53	1.48	0.06	vanillic acid	0018_5-Methylcytosine_positive_M+H126p0662_4p35	19467.3	20094.8	17505.1	25231.8	15144.7	17703.7	25504.1	22279.2	0	0	0
14	xanthine	yes	xanthine			C5H4N4O2	negative	152.033	LRFVTYWOQMYALW-UHFFFAOYSA-N	0	1	1	2	Level 1				no ref match available or no MSMS collected	906445	20180730_MV_JS_Wildermuth_Diurnal3_20180627ts_QE144_Ag683775-924_USHXG01062_NEG_MSMS-v2_shoot-EON-Brachy-2-434-4-S_IR02__068.h5	2.69099						[M-H]-	151.026	151.025	0.0012	7.9334	2.37	2.91	2.69	2.63	0.06	xanthine	0019_riboflavin_positive_M+H377p1456_4p51	0	0	0	0	0	18998.7	0	0	217072	1.42708e+06	453307
50	xanthosine	yes	xanthosine			C10H12N4O6	negative	284.076	UBORTCNDUKBEOP-UUOKFMHZSA-N	1	1	1	3	Level 1+				co-isolated precursor but all reference ions are in sample spectrum	1.96122e+06	20180730_MV_JS_Wildermuth_Diurnal3_20180627ts_QE144_Ag683775-924_USHXG01062_NEG_MSMS-v2_root-EON-Medicago-2-444-4b-R_IR02__083.h5	9.67678	20180730_MV_JS_Wildermuth_Diurnal3_20180627ts_QE144_Ag683775-924_USHXG01062_NEG_MSMS-v2_root-EON-Medicago-2-444-4b-R_IR02__083.h5	9.41	2	151.025,283.068	0.6641	[M-H]-	283.068	283.068	0.0001	0.5182	9.29	9.58	9.68	9.42	0.26	xanthosine	0020_cytosine_positive_M+H112p0506_4p78	33885.9	20023.1	24607.3	42482.6	33205.9	31928.1	24011.1	18290.3	2.09348e+06	3098903	811306
45	xanthurenic acid	yes	xanthurenic acid			C10H7NO4	negative	205.038	FBZONXHGGPHHIY-UHFFFAOYSA-N	1	1	1	3	Level 1+				co-isolated precursor but all reference ions are in sample spectrum	2343307	20180730_MV_JS_Wildermuth_Diurnal3_20180627ts_QE144_Ag683775-924_USHXG01062_NEG_MSMS-v2_shoot-EON-Brachy-5-438-4-S_IR02_rerun_234.h5	8.93641	20180730_MV_JS_Wildermuth_Diurnal3_20180627ts_QE144_Ag683775-924_USHXG01062_NEG_MSMS-v2_root-EOD-Arabidopsis-6-456-3-R_IR02_rerun_258.h5	8.85	2	160.039,204.030	0.5853	[M-H]-	204.03	204.03	0.0004	2.0061	8.71	9	8.94	8.85	0.09	xanthurenic acid	0021_allantoin_positive_M+H159p0513_4p89	0	0	0	0	0	0	0	0	0	0	0
[truncated: 62 more columns]

## Sheet: Diurnal Exudates
COMPOUND ANNOTATION										COMPOUND IDENTIFICATION SCORES									MS1 INTENSITY INFORMATION			MSMS INFORMATION				MSMS EVALUATION	ION INFORMATION			M/Z EVALUATION		CHROMATOGRAPHIC PEAK INFORMATION				RT EVALUATION	sample	InjBl-MeOH_IR05	InjBl-MeOH_IR18	InjBl-MeOH_IR31	InjBl-MeOH_IR44	InjBl-MeOH_IR57	exudate-EOD-Arabidopsis-1-451-1	exudate-EOD-Arabidopsis-2-452-1	exudate-EOD-Arabidopsis-3-453-1	exudate-EOD-Arabidopsis-4-454-1	exudate-EOD-Arabidopsis-5-455-1	exudate-EOD-Arabidopsis-6-456-1	exudate-EOD-Arabidopsis-7-457-1
Compound #	Identified Metabolite	Use for peak heights comparison?	Name of metabolite searched for	Labels of Overlapping Compounds	Inchi Keys of Overlapping Compounds	Molecular Formula	Polarity	Exact Mass	Inchi Key	MSMS Score (0 to 1)	m/z score (0 to 1)	RT score (0 to 1)	Total ID Score (0 to 3)	Mass Spec Inititative Identification Level	Isomer details	Identification notes	MS1 notes	MS2 notes	Maximum MS1 intensity across all files	Filename w/ maximum MS1	Retention time of max intensity MS1 peak	File with highest MSMS match score	RT of highest matched MSMS scan	Number of ion matches in msms spectra to EMA reference spectra	List of ion matches in msms spectra to EMA reference spectra		Adduct	Theoretical m/z	Measured m/z	mass error (delta Da)	mass error (delta ppm)	Minimum retention time (min)	Maximum retention time (max)	Theoretical retention time (peak)	Detected RT (peak)	RT error (absolute delta)	group	InjBl-MeOH	InjBl-MeOH	InjBl-MeOH	InjBl-MeOH	InjBl-MeOH	exudate-EOD-Arabidopsis	exudate-EOD-Arabidopsis	exudate-EOD-Arabidopsis	exudate-EOD-Arabidopsis	exudate-EOD-Arabidopsis	exudate-EOD-Arabidopsis	exudate-EOD-Arabidopsis
Unique for study	Some isomers are not chromatographically or spectrally resolvable.		Name of standard reference compound in library match.	compound with similar mz (abs difference <= 0.005) or monoisotopic molecular weight (abs difference <= 0.005) and RT (min or max within the RT-min-max-range of similar compound)	List of inchi keys that correspond to the compounds listed in the previous column			monoisotopic mass (neutral except for permanently charged molecules)	neutralized version	1 (MSMS matches ref. std.), 0.5 (possible match), 0 (no MSMS collected or no appropriate ref available), -1 (bad match)	POS MODE: 1 (delta ppm </= 5 or delta Da </= 0.001), 0.5 (delta ppm 5-10 and delta Da > 0.001), 0 (delta ppm > 10) NEG MODE: 1 (delta ppm </= 15 or delta Da </= 0.005), 0.5 (delta ppm 15-20 and delta Da > 0.001), 0 (delta ppm > 20) (NOTE: neg mass accuracy is not as good as pos) mz_quality	1 (delta RT </= 0.5), 0.5 (delta RT > 0.5 & </= 2), 0 (delta RT > 2 min)	sum of m/z, RT and MSMS score	Level 1 = Two independent and orthogonal properties match authentic standard; else = putative [Metabolomics. 2007 Sep; 3(3): 211-221. doi: 10.1007/s11306-007-0082-2]	Isomers have same formula (and m/z) and similar RT - MSMS spectra may be used to differentiate (exceptions) or RT elution order									mean # of fragment ions matching between compound in sample and reference compound / standard; may include parent and isotope ions and very low intensity background ions (these do not contribute to score)		MSMS score (highest across all samples), scale of 0 to 1 based on an algorithm. 0 = no match, 1 = perfect match. If no score, then no MSMS was acquired for that compound (@ m/z & RT window).	More than one may be detectable; the one evaluated is listed	theoretical m/z for a given compound / adduct pair	average m/z within 20ppm of theoretical detected across all samples @ RT peak	absolute difference between theoretical and detected m/z	ppm difference between theoretical and detected m/z	Retention range including start and end of detection of an m/z value (Note: Peak Height is calculated as the highest intensity of an m/z within the min/max RT range. Peak Area is calculated as the integrated area under the curve for an m/z within the mix/max RT range.)		theoretical retention time for a compound based upon reference standard at highest intensity point of peak	average retention time for a detected compound at highest intensity point of peak across all samples	absolute difference between theoretical and detected RT peak	file	20180727_MV_JS_Wildermuth_Diurnal3_20180627re_QE144_Ag683775-924_USHXG01062_FPS_MS1_InjBl-MeOH_IR05__009.h5	20180727_MV_JS_Wildermuth_Diurnal3_20180627re_QE144_Ag683775-924_USHXG01062_FPS_MS1_InjBl-MeOH_IR18__045.h5	20180727_MV_JS_Wildermuth_Diurnal3_20180627re_QE144_Ag683775-924_USHXG01062_FPS_MS1_InjBl-MeOH_IR31__081.h5	20180727_MV_JS_Wildermuth_Diurnal3_20180627re_QE144_Ag683775-924_USHXG01062_FPS_MS1_InjBl-MeOH_IR44_rerun_159.h5	20180727_MV_JS_Wildermuth_Diurnal3_20180627re_QE144_Ag683775-924_USHXG01062_FPS_MS1_InjBl-MeOH_IR57_rerun_196.h5	20180727_MV_JS_Wildermuth_Diurnal3_20180627re_QE144_Ag683775-924_USHXG01062_POS_MSMS-v2_exudate-EOD-Arabidopsis-1-451-1_IR01_rerun_181.h5	20180727_MV_JS_Wildermuth_Diurnal3_20180627re_QE144_Ag683775-924_USHXG01062_POS_MSMS-v2_exudate-EOD-Arabidopsis-2-452-1_IR01__022.h5	20180727_MV_JS_Wildermuth_Diurnal3_20180627re_QE144_Ag683775-924_USHXG01062_POS_MSMS-v2_exudate-EOD-Arabidopsis-3-453-1_IR01__085.h5	20180727_MV_JS_Wildermuth_Diurnal3_20180627re_QE144_Ag683775-924_USHXG01062_POS_MSMS-v2_exudate-EOD-Arabidopsis-4-454-1_IR01__097.h5	20180727_MV_JS_Wildermuth_Diurnal3_20180627re_QE144_Ag683775-924_USHXG01062_POS_MSMS-v2_exudate-EOD-Arabidopsis-5-455-1_IR01__055.h5	20180727_MV_JS_Wildermuth_Diurnal3_20180627re_QE144_Ag683775-924_USHXG01062_POS_MSMS-v2_exudate-EOD-Arabidopsis-6-456-1_IR01__046.h5	20180727_MV_JS_Wildermuth_Diurnal3_20180627re_QE144_Ag683775-924_USHXG01062_POS_MSMS-v2_exudate-EOD-Arabidopsis-7-457-1_IR01__073.h5
index	identified_metabolite		label	overlapping_compound	overlapping_inchi_keys	formula	polarity	exact_mass	inchi_key	msms_quality	mz_quality	rt_quality	total_score	msi_level	isomer_details	identification_notes	ms1_notes	ms2_notes	max_intensity	max_intensity_file	ms1_rt_peak	msms_file	msms_rt	msms_numberofions	msms_matchingions	msms_score	mz_adduct	mz_theoretical	mz_measured	mz_error	mz_ppmerror	rt_min	rt_max	rt_theoretical	rt_measured	rt_error	file	20180727_MV_JS_Wildermuth_Diurnal3_20180627re_QE144_Ag683775-924_USHXG01062_FPS_MS1_InjBl-MeOH_IR05__009.h5	20180727_MV_JS_Wildermuth_Diurnal3_20180627re_QE144_Ag683775-924_USHXG01062_FPS_MS1_InjBl-MeOH_IR18__045.h5	20180727_MV_JS_Wildermuth_Diurnal3_20180627re_QE144_Ag683775-924_USHXG01062_FPS_MS1_InjBl-MeOH_IR31__081.h5	20180727_MV_JS_Wildermuth_Diurnal3_20180627re_QE144_Ag683775-924_USHXG01062_FPS_MS1_InjBl-MeOH_IR44_rerun_159.h5	20180727_MV_JS_Wildermuth_Diurnal3_20180627re_QE144_Ag683775-924_USHXG01062_FPS_MS1_InjBl-MeOH_IR57_rerun_196.h5	20180727_MV_JS_Wildermuth_Diurnal3_20180627re_QE144_Ag683775-924_USHXG01062_NEG_MSMS-v2_exudate-EOD-Arabidopsis-1-451-1_IR02_rerun_182.h5	20180727_MV_JS_Wildermuth_Diurnal3_20180627re_QE144_Ag683775-924_USHXG01062_NEG_MSMS-v2_exudate-EOD-Arabidopsis-2-452-1_IR02__023.h5	20180727_MV_JS_Wildermuth_Diurnal3_20180627re_QE144_Ag683775-924_USHXG01062_NEG_MSMS-v2_exudate-EOD-Arabidopsis-3-453-1_IR02__086.h5	20180727_MV_JS_Wildermuth_Diurnal3_20180627re_QE144_Ag683775-924_USHXG01062_NEG_MSMS-v2_exudate-EOD-Arabidopsis-4-454-1_IR02__098.h5	20180727_MV_JS_Wildermuth_Diurnal3_20180627re_QE144_Ag683775-924_USHXG01062_NEG_MSMS-v2_exudate-EOD-Arabidopsis-5-455-1_IR02__056.h5	20180727_MV_JS_Wildermuth_Diurnal3_20180627re_QE144_Ag683775-924_USHXG01062_NEG_MSMS-v2_exudate-EOD-Arabidopsis-6-456-1_IR02__047.h5	20180727_MV_JS_Wildermuth_Diurnal3_20180627re_QE144_Ag683775-924_USHXG01062_NEG_MSMS-v2_exudate-EOD-Arabidopsis-7-457-1_IR02__074.h5
2	2-hydroxypyridine	yes	2-hydroxypyridine			C5H5NO	positive	95.0371	UBQKCCHYAOITMY-UHFFFAOYSA-N	1	1	1	3	Level 1+				perfect match to internal reference library	6.63875e+06	20180727_MV_JS_Wildermuth_Diurnal3_20180627re_QE144_Ag683775-924_USHXG01062_POS_MSMS-v2_exudate-EOD-Arabidopsis-8-458-1_IR01__010.h5	1.31766	20180727_MV_JS_Wildermuth_Diurnal3_20180627re_QE144_Ag683775-924_USHXG01062_POS_MSMS-v2_exudate-EOD-Arabidopsis-8-458-1_IR01__010.h5	1.3	3	51.024,78.035,96.045	0.947	[M+H]+	96.0444	96.0447	0.0003	2.6615	1.25	1.37	1.32	1.29	0.03	0002_2-HYDROXYPYRIDINE_positive_M+H96p0444_1p32	83813.2	68437.9	41771.5	54231.5	48047.4	1.45562e+06	6172855	418285	657067	432328	594339	1.64442e+06
37	2',3'-cyclic AMP	yes	2',3'-cyclic AMP			C10H12N5O6P	positive	329.053	KMYWVDDIPVNLME-KQYNXXCUSA-N	1	1	1	3	Level 1+				perfect match to internal reference library	832339	20180727_MV_JS_Wildermuth_Diurnal3_20180627re_QE144_Ag683775-924_USHXG01062_POS_MSMS-v2_exudate-EOD-Arabidopsis-6-456-1_IR01__046.h5	10.5464	20180727_MV_JS_Wildermuth_Diurnal3_20180627re_QE144_Ag683775-924_USHXG01062_POS_MSMS-v2_exudate-EOD-Arabidopsis-6-456-1_IR01__046.h5	10.61	3	69.034,136.062,330.060	0.8334	[M+H]+	330.06	330.059	0.0007	2.0959	10.37	10.72	10.55	10.53	0.02	0037_2_3Cyclic_AMP_positive_M+H330p0598_10p55				9512.02	10545.8	364237	801543	422289	633986	62166	832339	302911
12	3-methyladenine	yes	3-methyladenine			C6H7N5	positive	149.07	FSASIHFSFGAIJM-UHFFFAOYSA-N	1	1	1	3	Level 1+				perfect match to internal reference library	2.17652e+06	20180727_MV_JS_Wildermuth_Diurnal3_20180627re_QE144_Ag683775-924_USHXG01062_POS_MSMS-v2_exudate-EOD-Arabidopsis-2-452-1_IR01__022.h5	3.5834	20180727_MV_JS_Wildermuth_Diurnal3_20180627re_QE144_Ag683775-924_USHXG01062_POS_MSMS-v2_exudate-EOD-Arabidopsis-5-455-1_IR01__055.h5	3.66	2	133.051,150.078	0.9548	[M+H]+	150.077	150.077	0.0004	2.9509	3.5	3.8	3.58	3.66	0.08	0012_3-methyladenine_positive_M+H150p0774_3p58	16712.4			8502.1	9639.95	335281	2.17652e+06	838429	1.44644e+06	813594	1.28694e+06	535699
32	3,5-diiodo-tyrosine	yes	3,5-diiodo-tyrosine			C9H9I2NO3	positive	432.867	NYPYHUZRZVSYKL-ZETCQYMHSA-N	1	1	1	3	Level 1+				perfect match to internal reference library	2.3098e+06	20180727_MV_JS_Wildermuth_Diurnal3_20180627re_QE144_Ag683775-924_USHXG01062_POS_MSMS-v2_exudate-EOD-Arabidopsis-2-452-1_IR01__022.h5	8.87876	20180727_MV_JS_Wildermuth_Diurnal3_20180627re_QE144_Ag683775-924_USHXG01062_POS_MSMS-v2_exudate-EOD-Arabidopsis-2-452-1_IR01__022.h5	8.46	5	260.966,289.944,387.869,416.847,433.875	0.7631	[M+H]+	433.875	433.874	0.0009	1.9737	8.32	8.72	8.88	8.56	0.32	0032_3_5-Diiodo-L-tyrosine_positive_M+H433p8745_8p88						37368.3	2.3098e+06	605328	15236.8	23516.5	44798.4	40001.7
52	4-aminobutanoic acid	yes	4-aminobutanoic acid			C4H9NO2	positive	103.063	BTCSSZJGUNDROE-UHFFFAOYSA-N	0	1	1	2	Level 1				no ref match available or no MSMS collected	1.91799e+06	20180727_MV_JS_Wildermuth_Diurnal3_20180627re_QE144_Ag683775-924_USHXG01062_POS_MSMS-v2_exudate-EON-Arabidopsis-2-452-2_IR01_rerun_163.h5	14.2136						[M+H]+	104.071	104.071	0.0002	1.4618	14.11	14.3	14.21	14.24	0.02	0052_4-aminobutyric_acid_positive_M+H104p0706_14p21						1.20902e+06	1.06014e+06	91635	114324	226373	355290	139423
50	4-guanidinobutanoic acid	yes	4-guanidinobutanoic acid			C5H11N3O2	positive	145.085	TUHVEAJXIMEOSA-UHFFFAOYSA-N	1	1	1	3	Level 1+				perfect match to internal reference library	3272270	20180727_MV_JS_Wildermuth_Diurnal3_20180627re_QE144_Ag683775-924_USHXG01062_POS_MSMS-v2_exudate-EOD-Arabidopsis-2-452-1_IR01__022.h5	13.7244	20180727_MV_JS_Wildermuth_Diurnal3_20180627re_QE144_Ag683775-924_USHXG01062_POS_MSMS-v2_exudate-EOD-Arabidopsis-2-452-1_IR01__022.h5	13.7	7	60.056,86.061,87.045,104.071,128.083,129.067,146.093	0.741	[M+H]+	146.092	146.092	0.0002	1.5532	13.6	13.88	13.72	13.74	0.02	0050_4-Guanidinobutyric_acid_positive_M+H146p0924_13p72	34439.1	27570.6	21749.6	10756.4		948569	3272270	2.18043e+06	1.59104e+06	789549	1.29802e+06	1.01585e+06
28	4-hydroxy-2-quinolinecarboxylic acid	yes	4-hydroxy-2-quinolinecarboxylic acid			C10H7NO3	positive	189.043	HCZHHEIFKROPDY-UHFFFAOYSA-N	0	1	1	2	Level 1				no ref match available or no MSMS collected	2118955	20180727_MV_JS_Wildermuth_Diurnal3_20180627re_QE144_Ag683775-924_USHXG01062_POS_MSMS-v2_exudate-EOD-Arabidopsis-8-458-1_IR01__010.h5	8.03628						[M+H]+	190.05	190.05	0.0001	0.4497	7.52	7.68	8.04	7.6	0.44	0028_kynurenic_acid_positive_M+H190p0499_8p04	277285	197475	189306	135838	95602.2	7552.11	427595	194745	434008	172694	348815	176843
48	4-hydroxyproline	yes	cis-4-hydroxy-proline	cis-4-hydroxy-proline//trans-4-hydroxyproline	PMMYEEVYMWASQN-QWWZWVQMSA-N//PMMYEEVYMWASQN-DMTCNVIQSA-N	C5H9NO3	positive	131.058	PMMYEEVYMWASQN-QWWZWVQMSA-N	0	1	1	2	Level 1	unresolvable isomers			no ref match available or no MSMS collected	888493	20180727_MV_JS_Wildermuth_Diurnal3_20180627re_QE144_Ag683775-924_USHXG01062_POS_MSMS-v2_exudate-EOD-Arabidopsis-8-458-1_IR01__010.h5	13.5208						[M+H]+	132.065	132.065	0.0002	1.4621	12.98	13.29	13.52	13.09	0.43	0048_cis-4-Hydroxy-D-proline_positive_M+H132p0655_13p52	15272.3					42160.9	577770	48050.9	298144	175384	96846.9	85731.5
16	4-quinolinecarboxylic acid and isomers	yes	4-quinolinecarboxylic acid			C10H7NO2	positive	173.048	VQMSRUREDGBWKT-UHFFFAOYSA-N	1	1	1	3	Level 1+			multiple, unresolvable peaks	perfect match to internal reference library	13184551	20180727_MV_JS_Wildermuth_Diurnal3_20180627re_QE144_Ag683775-924_USHXG01062_POS_MSMS-v2_exudate-EOD-Arabidopsis-2-452-1_IR01__022.h5	5.37058	20180727_MV_JS_Wildermuth_Diurnal3_20180627re_QE144_Ag683775-924_USHXG01062_POS_MSMS-v2_exudate-EOD-Arabidopsis-7-457-1_IR01__073.h5	5.32	4	128.049,130.065,146.060,174.055	0.946	[M+H]+	174.055	174.055	0.0002	1.003	5.01	6	5.37	5.58	0.21	0016_Quinoline-4-carboxylic_acid_positive_M+H174p0550_5p37	10419.6					6208798	13184551	9832704	9885921	10131411	12569562	8137456
24	5-oxo-proline	yes	5-oxo-proline			C5H7NO3	negative	129.043	ODHCTXKNWHHXJC-VKHMYHEASA-N	1	1	1	3	Level 1+				perfect match to internal reference library	7060685	20180727_MV_JS_Wildermuth_Diurnal3_20180627re_QE144_Ag683775-924_USHXG01062_NEG_MSMS-v2_exudate-EOD-Arabidopsis-2-452-1_IR02__023.h5	11.5284	20180727_MV_JS_Wildermuth_Diurnal3_20180627re_QE144_Ag683775-924_USHXG01062_NEG_MSMS-v2_exudate-EON-Arabidopsis-5-455-2_IR02_rerun_188.h5	11.23	2	82.028,128.034	0.9675	[M-H]-	128.035	128.034	0.0012	9.6351	10.99	11.82	11.53	11.3	0.23	0024_L-Pyroglutamic_acid_negative_M-H128p0353_11p53	56378.6	21527.1	15682.4	67696	17449.8	3020776	7060685	2.66961e+06	2.47438e+06	734405	4.02966e+06	1278365
5	5'-methylthioadenosine	yes	5'-methylthioadenosine			C11H15N5O3S	positive	297.09	WUUGFSXJNOTRMR-IOSLPCCCSA-N	0	1	1	2	Level 1				no ref match available or no MSMS collected	1.01733e+06	20180727_MV_JS_Wildermuth_Diurnal3_20180627re_QE144_Ag683775-924_USHXG01062_POS_MSMS-v2_exudate-EOD-Arabidopsis-2-452-1_IR01__022.h5	1.6126						[M+H]+	298.097	298.096	0.0006	1.8751	1.52	1.68	1.61	1.6	0.01	0005_Methylthioadenosine_positive_M+H298p0969_1p61						319417	1.01733e+06	341417	916053	694465	974493	501960
8	adenine	yes	adenine			C5H5N5	positive	135.054	GFFGJBXGBJISGV-UHFFFAOYSA-N	1	1	1	3	Level 1+				perfect match to internal reference library	246764128	20180727_MV_JS_Wildermuth_Diurnal3_20180627re_QE144_Ag683775-924_USHXG01062_POS_MSMS-v2_exudate-EOD-Arabidopsis-2-452-1_IR01__022.h5	2.51885	20180727_MV_JS_Wildermuth_Diurnal3_20180627re_QE144_Ag683775-924_USHXG01062_POS_MSMS-v2_exudate-EON-Brachy-2-434-2_IR01_rerun_175.h5	2.64	4	94.040,119.035,136.062,137.046	0.9444	[M+H]+	136.062	136.062	0.0002	1.6419	2.43	2.73	2.52	2.57	0.05	0008_adenine_positive_M+H136p0618_2p52	93046.6	155371	37634.5	79053.4	118351	54749312	246764128	150984656	219468944	101623560	196435520	174265024
10	adenosine and isomers	yes	adenosine			C10H13N5O4	positive	267.097	OIRDTQYFTABQOQ-KQYNXXCUSA-N	1	1	1	3	Level 1+			multiple, unresolvable peaks	perfect match to internal reference library	151938320	20180727_MV_JS_Wildermuth_Diurnal3_20180627re_QE144_Ag683775-924_USHXG01062_POS_MSMS-v2_exudate-EOD-Arabidopsis-2-452-1_IR01__022.h5	3.02174	20180727_MV_JS_Wildermuth_Diurnal3_20180627re_QE144_Ag683775-924_USHXG01062_POS_MSMS-v2_exudate-EOD-Arabidopsis-1-451-1_IR01_rerun_181.h5	2.95	2	136.062,268.104	0.9711	[M+H]+	268.104	268.103	0.0005	2.0228	2.69	3.31	3.02	3.02	0.01	0010_adenosine_positive_M+H268p1041_3p02	66063.8	90138.5	45252.3	25003.2	87988.8	24162014	151938320	80536400	91500744	10301527	130324088	79722800
61	agmatine sulfuric acid	yes	agmatine sulfuric acid			C5H14N4	positive	130.122	QYPPJABKJHAVHS-UHFFFAOYSA-N	1	1	1	3	Level 1+				perfect match to internal reference library	47022908	20180727_MV_JS_Wildermuth_Diurnal3_20180627re_QE144_Ag683775-924_USHXG01062_POS_MSMS-v2_exudate-EON-Medicago-2-444-2_IR01_rerun_169.h5	16.9631	20180727_MV_JS_Wildermuth_Diurnal3_20180627re_QE144_Ag683775-924_USHXG01062_POS_MSMS-v2_exudate-EOD-Medicago-3-449-1_IR01_rerun_184.h5	17.04	5	60.057,72.082,97.077,114.103,131.129	0.886	[M+H]+	131.129	131.129	0.0002	1.4668	16.66	17.12	16.96	16.93	0.03	0061_agmatine_positive_M+H131p1291_16p96				10141.4		2208810	6536934	1.52795e+06	4.86062e+06	4.70724e+06	4195013	2.87926e+06
28	alanine	yes	alanine			C3H7NO2	negative	89.0477	QNAYBMKLOCPYGJ-REOHCLBHSA-N	1	1	1	3	Level 1+				perfect match to internal reference library	2.17186e+06	20180727_MV_JS_Wildermuth_Diurnal3_20180627re_QE144_Ag683775-924_USHXG01062_NEG_MSMS-v2_exudate-EOD-Arabidopsis-2-452-1_IR02__023.h5	13.2625	20180727_MV_JS_Wildermuth_Diurnal3_20180627re_QE144_Ag683775-924_USHXG01062_NEG_MSMS-v2_exudate-EON-Arabidopsis-2-452-2_IR02_rerun_164.h5	13.15	1	88.039	0	[M-H]-	88.0404	88.039	0.0014	16.0399	13.07	13.4	13.26	13.21	0.05	0028_L-alanine_negative_M-H88p0404_13p26				11835.1	6123.48	417541	2.17186e+06	139913	101188	57909.4	629638	113663
15	allantoin	yes	allantoin			C4H6N4O3	positive	158.044	POJWUDADGALRAB-UHFFFAOYSA-N	0	1	1	2	Level 1				no ref match available or no MSMS collected	986418	20180727_MV_JS_Wildermuth_Diurnal3_20180627re_QE144_Ag683775-924_USHXG01062_POS_MSMS-v2_exudate-EOD-Arabidopsis-4-454-1_IR01__097.h5	4.88878						[M+H]+	159.051	159.051	0.0002	1.1592	4.34	4.72	4.89	4.55	0.34	0015_allantoin_positive_M+H159p0513_4p89						133981	633204	699958	986418	491801	676558	303551
44	alpha-aminoadipic acid	yes	alpha-aminoadipic acid			C6H11NO4	negative	161.069	OYIFNHCXNCRBQI-BYPYZUCNSA-N	0	1	1	2	Level 1				no ref match available or no MSMS collected	185823	20180727_MV_JS_Wildermuth_Diurnal3_20180627re_QE144_Ag683775-924_USHXG01062_NEG_MSMS-v2_exudate-EOD-Arabidopsis-8-458-1_IR02__011.h5	15.7001						[M-H]-	160.061	160.06	0.0011	6.6324	15.97	16.42	15.7	16.16	0.46	0044_L-2-Aminoadipic_acid_negative_M-H160p0615_15p70					3568.06	135244	131085	103001	142637	137860	178295	51131.2
59	arginine	yes	arginine			C6H14N4O2	positive	174.112	ODKSFYDXXFIFQN-BYPYZUCNSA-N	1	1	1	3	Level 1+				perfect match to internal reference library	22724072	20180727_MV_JS_Wildermuth_Diurnal3_20180627re_QE144_Ag683775-924_USHXG01062_POS_MSMS-v2_exudate-EON-Arabidopsis-6-456-2_IR01_rerun_166.h5	16.7557	20180727_MV_JS_Wildermuth_Diurnal3_20180627re_QE144_Ag683775-924_USHXG01062_POS_MSMS-v2_exudate-EOD-Arabidopsis-8-458-1_IR01__010.h5	16.78	7	60.056,70.066,72.081,116.071,130.098,158.093,175.119	0.9361	[M+H]+	175.119	175.119	0.0003	1.7709	16.63	16.93	16.76	16.83	0.07	0059_L-arginine_positive_M+H175p1190_16p76	142312	81411.2	86583.2	255263	124288	4.52421e+06	2.14494e+06	14949389	15151798	2.52371e+06	19307038	8161454
36	asparagine	yes	asparagine			C4H8N2O3	negative	132.053	DCXYFEDJOCDNAF-REOHCLBHSA-N	1	1	1	3	Level 1+				perfect match to internal reference library	13148549	20180727_MV_JS_Wildermuth_Diurnal3_20180627re_QE144_Ag683775-924_USHXG01062_NEG_MSMS-v2_exudate-EON-Medicago-2-444-2_IR02_rerun_170.h5	14.2157	20180727_MV_JS_Wildermuth_Diurnal3_20180627re_QE144_Ag683775-924_USHXG01062_NEG_MSMS-v2_exudate-EON-Medicago-1-442-2_IR02__059.h5	14.21	8	70.028,71.024,72.008,95.024,111.018,113.034,114.018,131.045	0.8579	[M-H]-	131.046	131.045	0.0012	8.7994	14.05	14.58	14.22	14.29	0.07	0036_L-asparagine_negative_M-H131p0462_14p22	22496.1	8936.52	7992.02	132205	41890.1	1.56902e+06	2789145	1.08778e+06	1.14528e+06	444925	4.20238e+06	858137
46	aspartic acid	yes	aspartic acid			C4H7NO4	negative	133.038	CKLJMWTZIZZHCS-REOHCLBHSA-N	0.5	1	1	2.5	Level 1+				co-isolated precursor partial match	26746060	20180727_MV_JS_Wildermuth_Diurnal3_20180627re_QE144_Ag683775-924_USHXG01062_NEG_MSMS-v2_exudate-EOD-TxCtrl-3-459-1_IR02__017.h5	15.9601	20180727_MV_JS_Wildermuth_Diurnal3_20180627re_QE144_Ag683775-924_USHXG01062_NEG_MSMS-v2_exudate-EOD-TxCtrl-2-450-1_IR02__032.h5	16.28	2	88.039,132.029	0.8023	[M-H]-	132.03	132.029	0.0011	8.6833	15.86	16.68	15.96	16.3	0.34	0046_56-84-8_negative_M-H132p0302_15p96	80402.1	24761.9	16188.2	91402.2	26688.9	17894954	377019	523537	224891	733966	2123119	730009
27	betaine	yes	betaine			C5H12NO2+	positive	118.086	KWIUHFFTVRNATP-UHFFFAOYSA-O	1	1	1	3	Level 1+				perfect match to internal reference library	240318688	20180727_MV_JS_Wildermuth_Diurnal3_20180627re_QE144_Ag683775-924_USHXG01062_POS_MSMS-v2_exudate-EON-Arabidopsis-6-456-2_IR01_rerun_166.h5	7.83223	20180727_MV_JS_Wildermuth_Diurnal3_20180627re_QE144_Ag683775-924_USHXG01062_POS_MSMS-v2_exudate-EON-TxCtrl-1-441-2_IR01__109.h5	8.08	3	58.066,59.074,118.087	0.971	[M]+	118.086	118.086	0	0.1803	7.96	8.57	7.83	8.29	0.46	0027_TRIMETHYL_GLYCINE_positive_M118p0863_7p83	4.83267e+06	4.84544e+06	4230929	4.97236e+06	5.29159e+06	217209984	131070152	168164944	153308368	124376912	166454672	122664824
10	caffeic acid	yes	caffeic acid			C9H8O4	negative	180.042	QAIPRVGONGVQAS-RQOWECAXSA-N	0	1	1	2	Level 1				no ref match available or no MSMS collected	1.74611e+06	20180727_MV_JS_Wildermuth_Diurnal3_20180627re_QE144_Ag683775-924_USHXG01062_NEG_MSMS-v2_exudate-EOD-Arabidopsis-2-452-1_IR02__023.h5	3.26461						[M-H]-	179.035	179.034	0.0008	4.6628	3.01	3.37	3.26	3.13	0.13	0010_Caffeicacid_negative_M-H179p0350_3p26	31619.5	17673.7		14840.3		943162	1.74611e+06	494643	544231	537639	739145	743787
56	citrulline	yes	citrulline			C6H13N3O3	positive	175.096	RHGKLRLOHDJJDR-BYPYZUCNSA-N	0	1	1	2	Level 1				no ref match available or no MSMS collected	375294	20180727_MV_JS_Wildermuth_Diurnal3_20180627re_QE144_Ag683775-924_USHXG01062_POS_MSMS-v2_exudate-EON-Arabidopsis-6-456-2_IR01_rerun_166.h5	14.9339						[M+H]+	176.103	176.103	0.0003	1.5105	14.92	15.29	14.93	15.1	0.16	0056_L-citrulline_positive_M+H176p1030_14p93						186258	337178	153841	71503.3	57371.9	245634	113690
24	cytidine	yes	cytidine	cytidine//cytidine	UHDGCWIWMRVCDJ-XVFCMESISA-N//UHDGCWIWMRVCDJ-XVFCMESISA-N	C9H13N3O5	positive	243.086	UHDGCWIWMRVCDJ-XVFCMESISA-N	1	1	1	3	Level 1+				perfect match to internal reference library	25560056	20180727_MV_JS_Wildermuth_Diurnal3_20180627re_QE144_Ag683775-924_USHXG01062_POS_MSMS-v2_exudate-EOD-Arabidopsis-2-452-1_IR01__022.h5	6.86768	20180727_MV_JS_Wildermuth_Diurnal3_20180627re_QE144_Ag683775-924_USHXG01062_POS_MSMS-v2_exudate-EOD-Brachy-6-439-1_IR01__064.h5	6.71	2	95.025,112.051	0.6782	[M+H]+	244.093	244.092	0.0004	1.6561	6.4	7.19	6.87	6.76	0.11	0024_cytidine_positive_M+H244p0928_6p87		19206.5			14918.1	14426782	25560056	8959915	19599710	796716	16479282	9301749
14	cytosine	yes	cytosine			C4H5N3O	positive	111.043	OPTASPLRGRRNAP-UHFFFAOYSA-N	1	1	1	3	Level 1+				perfect match to internal reference library	19990248	20180727_MV_JS_Wildermuth_Diurnal3_20180627re_QE144_Ag683775-924_USHXG01062_POS_MSMS-v2_exudate-EOD-Arabidopsis-2-452-1_IR01__022.h5	4.77655	20180727_MV_JS_Wildermuth_Diurnal3_20180627re_QE144_Ag683775-924_USHXG01062_POS_MSMS-v2_exudate-EOD-Arabidopsis-2-452-1_IR01__022.h5	4.71	5	67.030,69.046,94.040,95.025,112.051	0.9559	[M+H]+	112.051	112.051	0.0001	1.0548	4.47	4.95	4.78	4.67	0.11	0014_cytosine_positive_M+H112p0506_4p78	47923.6	35340.2	15344.8	15890	20812.1	14222547	19990248	15443500	17077938	9498275	16042409	11034277
45	deoxycarnitine	yes	deoxycarnitine			C7H16NO2+	positive	146.118	JHPNVNIEXXLNTR-UHFFFAOYSA-O	1	1	1	3	Level 1+				perfect match to internal reference library	22000766	20180727_MV_JS_Wildermuth_Diurnal3_20180627re_QE144_Ag683775-924_USHXG01062_POS_MSMS-v2_exudate-EOD-Arabidopsis-2-452-1_IR01__022.h5	13.2984	20180727_MV_JS_Wildermuth_Diurnal3_20180627re_QE144_Ag683775-924_USHXG01062_POS_MSMS-v2_exudate-EON-Arabidopsis-6-456-2_IR01_rerun_166.h5	13.48	3	60.082,87.045,146.118	0.9615	[M]+	146.118	146.117	0.0002	1.1905	13.3	13.71	13.3	13.52	0.23	0045_gamma-butyrobetaine_positive_M146p1176_13p30			10957.9	12945.4		6.16784e+06	22000766	8914873	8776651	5.40054e+06	11632710	6542743
17	deoxycytidine	yes	deoxycytidine			C9H13N3O4	positive	227.091	CKTSBUTUHBMZGZ-SHYZEUOFSA-N	0	1	1	2	Level 1				no ref match available or no MSMS collected	307296	20180727_MV_JS_Wildermuth_Diurnal3_20180627re_QE144_Ag683775-924_USHXG01062_POS_MSMS-v2_exudate-EOD-Brachy-5-438-1_IR01_rerun_190.h5	5.54573						[M+H]+	228.098	228.098	0.0002	0.9696	5.24	5.59	5.55	5.43	0.12	0017_2deoxycytidine_positive_M+H228p0979_5p55						116352	239654	86958	134684		126957	58355.7
46	dihexose (ex. sucrose, palatinose)	yes	sucrose	palatinose//sucrose	PVXPPJIGRGXGCY-TZLCEDOOSA-N//CZMRCDWAGMRECN-UGDNZRGBSA-N	C12H22O11	positive	342.116	CZMRCDWAGMRECN-UGDNZRGBSA-N	1	1	1	3	Level 1+				perfect match to internal reference library	23809826	20180727_MV_JS_Wildermuth_Diurnal3_20180627re_QE144_Ag683775-924_USHXG01062_POS_MSMS-v2_exudate-EOD-Arabidopsis-2-452-1_IR01__022.h5	13.3089	20180727_MV_JS_Wildermuth_Diurnal3_20180627re_QE144_Ag683775-924_USHXG01062_POS_MSMS-v2_exudate-EOD-Arabidopsis-2-452-1_IR01__022.h5	13.1	3	185.042,203.053,365.106	0.9682	[M+Na]+	365.105	365.105	0.0006	1.6614	12.96	13.33	13.31	13.12	0.19	0046_sucrose_positive_M+Na365p1054_13p31		19462.1		10557.2		1.8913e+06	23809826	4.78552e+06	11014611	4656521	5.60039e+06	4308129
38	dihexose (ex. trehalose, melibiose)	yes	trehalose	melibiose//trehalose	DLRVVLDZNNYCBX-ABXHMFFYSA-N//HDTRYLNUVZCQOY-LIZSDCNHSA-N	C12H22O11	negative	342.116	HDTRYLNUVZCQOY-LIZSDCNHSA-N	0	1	1	2	Level 1				no ref match available or no MSMS collected	297871	20180727_MV_JS_Wildermuth_Diurnal3_20180627re_QE144_Ag683775-924_USHXG01062_NEG_MSMS-v2_exudate-EOD-Arabidopsis-6-456-1_IR02__047.h5	14.2949						[M-H]-	341.109	341.109	0.0005	1.5695	14.63	14.91	14.29	14.74	0.44	0038_trehalose_negative_M-H341p1089_14p29				10017.1	9325.51	108874	288874	155738	173469	106276	297871	119119
2	ferulic acid	yes	ferulic acid			C10H10O4	negative	194.058	KSEBMYQBYZTDHS-HWKANZROSA-N	0	1	1	2	Level 1				no ref match available or no MSMS collected	339819	20180727_MV_JS_Wildermuth_Diurnal3_20180627re_QE144_Ag683775-924_USHXG01062_NEG_MSMS-v2_exudate-EOD-Arabidopsis-6-456-1_IR02__047.h5	1.28982						[M-H]-	193.051	193.05	0.0006	3.1962	1.15	1.33	1.29	1.22	0.07	0002_ferulic_acid_negative_M-H193p0506_1p29	16436.6					42350.2	118059	100159	153167	116997	339819	75138.2
47	fumaric acid	yes	fumaric acid			C4H4O4	negative	116.011	VZCYOOQTPOCHFL-OWOJBTEDSA-N	0.5	1	1	2.5	Level 1+				partial match of fragments	1.11685e+06	20180727_MV_JS_Wildermuth_Diurnal3_20180627re_QE144_Ag683775-924_USHXG01062_NEG_MSMS-v2_exudate-EOD-Arabidopsis-1-451-1_IR02_rerun_182.h5	16.3333	20180727_MV_JS_Wildermuth_Diurnal3_20180627re_QE144_Ag683775-924_USHXG01062_NEG_MSMS-v2_exudate-EON-Arabidopsis-2-452-2_IR02_rerun_164.h5	16.27	2	71.012,114.933	0.4494	[M-H]-	115.004	115.002	0.0012	10.5309	15.85	16.7	16.33	16.25	0.08	0047_fumaric_acid_negative_M-H115p0037_16p33	17764.8	7865.34	5402.94	13952	7061.05	1.11685e+06	52647.8	214610	341927	230260	875656	175001
37	gluconic acid	yes	gluconic acid			C6H12O7	negative	196.058	RGHNJXZEOKUKBD-SQOUGZDYSA-N	0.5	1	1	2.5	Level 1+				co-isolated precursor partial match	2.08386e+06	20180727_MV_JS_Wildermuth_Diurnal3_20180627re_QE144_Ag683775-924_USHXG01062_NEG_MSMS-v2_exudate-EOD-Arabidopsis-2-452-1_IR02__023.h5	14.2371	20180727_MV_JS_Wildermuth_Diurnal3_20180627re_QE144_Ag683775-924_USHXG01062_NEG_MSMS-v2_exudate-EON-Arabidopsis-7-457-2_IR02__038.h5	14.47	4	75.007,176.895,194.905,195.050	0.5011	[M-H]-	195.051	195.05	0.0007	3.5377	14.32	14.84	14.24	14.6	0.36	0037_gluconic_acid_negative_M-H195p0510_14p24	53461.9	35554.1	23653.8	197339	93281.6	920721	2.08386e+06	1.09076e+06	224743	424011	1.56187e+06	1.55796e+06
6	glucuronolactone	yes	glucuronolactone			C6H8O6	positive	176.032	UYUXSRADSPPKRZ-SKNVOMKLSA-N	0	1	1	2	Level 1				no ref match available or no MSMS collected	738668	20180727_MV_JS_Wildermuth_Diurnal3_20180627re_QE144_Ag683775-924_USHXG01062_POS_MSMS-v2_exudate-EOD-Arabidopsis-3-453-1_IR01__085.h5	2.0368						[M+NH4]+	194.066	194.066	0.0002	1.2725	2	2.32	2.04	2.14	0.1	0006_D-Glucurono-3_6-lactone_positive_M+NH4194p0659_2p04						218445	487412	738668	109317	134301	77305.5	70443.5
45	glutamic acid	yes	glutamic acid			C5H9NO4	negative	147.053	WHUUTDBJXJRKMK-VKHMYHEASA-N	1	1	0.5	2.5	Level 1+				perfect match to internal reference library	27969892	20180727_MV_JS_Wildermuth_Diurnal3_20180627re_QE144_Ag683775-924_USHXG01062_NEG_MSMS-v2_exudate-EOD-Arabidopsis-6-456-1_IR02__047.h5	15.7671	20180727_MV_JS_Wildermuth_Diurnal3_20180627re_QE144_Ag683775-924_USHXG01062_NEG_MSMS-v2_exudate-EON-Arabidopsis-3-453-2_IR02_rerun_161.h5	16.3	3	102.055,128.034,146.045	0.854	[M-H]-	146.046	146.045	0.001	6.6922	16.07	16.71	15.77	16.43	0.66	0045_L-glutamic_acid_negative_M-H146p0459_15p77	40733	5770.19		20100.6	4734.24	14839578	26571698	15294772	9942312	8990327	27969892	6.26101e+06
33	glutamine	yes	glutamine			C5H10N2O3	negative	146.069	ZDXPYRJPNDTMRX-VKHMYHEASA-N	1	1	1	3	Level 1+				perfect match to internal reference library	169194720	20180727_MV_JS_Wildermuth_Diurnal3_20180627re_QE144_Ag683775-924_USHXG01062_NEG_MSMS-v2_exudate-EOD-Arabidopsis-2-452-1_IR02__023.h5	14.1609	20180727_MV_JS_Wildermuth_Diurnal3_20180627re_QE144_Ag683775-924_USHXG01062_NEG_MSMS-v2_exudate-EOD-Arabidopsis-1-451-1_IR02_rerun_182.h5	14.07	14	72.007,74.023,82.029,84.044,86.023,97.039,98.023,101.071,107.024,109.039,125.034,127.050,128.034,145.061	0.8115	[M-H]-	145.062	145.061	0.001	7.0244	14.01	14.22	14.16	14.17	0.01	0033_L-glutamine_negative_M-H145p0618_14p16	17482	13215.2	8861.58	70059	30886.1	42902532	169194720	49477304	30746936	20488960	93813712	27100042
11	glyceraldehyde or lactic acid	yes	glyceraldehyde	glyceraldehyde//lactic acid	MNQZXJOMYWMBOU-UHFFFAOYSA-N//JVTAAEKCZFNVCJ-REOHCLBHSA-N	C3H6O3	negative	90.0317	MNQZXJOMYWMBOU-UHFFFAOYSA-N	0	1	1	2	Level 1	unresolvable isomers			no ref match available or no MSMS collected	1575352	20180727_MV_JS_Wildermuth_Diurnal3_20180627re_QE144_Ag683775-924_USHXG01062_NEG_MSMS-v2_exudate-EON-Arabidopsis-2-452-2_IR02_rerun_164.h5	4.98246						[M-H]-	89.0244	89.023	0.0014	15.7711	4.65	6.23	4.98	5.42	0.44	0011_glyceraldehyde_negative_M-H89p0244_4p98	79617.9	17642.8	11552.9	90316.7	32564.9	1.08743e+06	769792	192772	99837.6	301210	417063	235809
43	glycerol phosphoric acid	yes	sn-glycerol 3-phosphoric acid	glycerol 2-phosphoric acid//sn-glycerol 3-phosphoric acid	DHCLVCXQIBBOPH-UHFFFAOYSA-N//AWUCVROLDVIAJX-GSVOUGTGSA-N	C3H9O6P	negative	172.014	AWUCVROLDVIAJX-GSVOUGTGSA-N	0	1	1	2	Level 1	unresolvable isomers			no ref match available or no MSMS collected	265308	20180727_MV_JS_Wildermuth_Diurnal3_20180627re_QE144_Ag683775-924_USHXG01062_NEG_MSMS-v2_exudate-EOD-Medicago-1-442-1_IR02__020.h5	15.4242						[M-H]-	171.006	171.005	0.001	5.8596	15.11	15.63	15.42	15.31	0.12	0043_D-Glycerol_1-phosphate_negative_M-H171p0064_15p42	7393.22					3741.51	5221.88				6884.73
20	guanine	yes	guanine			C5H5N5O	positive	151.049	UYTPUPDQBNUYGX-UHFFFAOYSA-N	1	1	1	3	Level 1+				perfect match to internal reference library	78413232	20180727_MV_JS_Wildermuth_Diurnal3_20180627re_QE144_Ag683775-924_USHXG01062_POS_MSMS-v2_exudate-EOD-Arabidopsis-8-458-1_IR01__010.h5	6.18563	20180727_MV_JS_Wildermuth_Diurnal3_20180627re_QE144_Ag683775-924_USHXG01062_POS_MSMS-v2_exudate-EOD-Arabidopsis-3-453-1_IR01__085.h5	6.09	7	109.051,110.035,128.046,134.046,135.030,152.057,153.041	0.9462	[M+H]+	152.057	152.057	0.0001	0.9342	5.79	6.27	6.19	6.06	0.13	0020_guanine_positive_M+H152p0567_6p19	36095.1	31006.6	23279.8	11080.2	12381.3	17752254	56905728	40638424	63293908	12943104	37961096	50616404
15	guanosine	yes	guanosine			C10H13N5O5	negative	283.092	NYHBQMYGNKIUIF-UUOKFMHZSA-N	1	1	1	3	Level 1+				perfect match to internal reference library	14980376	20180727_MV_JS_Wildermuth_Diurnal3_20180627re_QE144_Ag683775-924_USHXG01062_NEG_MSMS-v2_exudate-EOD-Brachy-1-433-1_IR02__053.h5	8.47733	20180727_MV_JS_Wildermuth_Diurnal3_20180627re_QE144_Ag683775-924_USHXG01062_NEG_MSMS-v2_exudate-EOD-Arabidopsis-6-456-1_IR02__047.h5	8.25	3	133.015,150.041,282.085	0.9484	[M-H]-	282.084	282.085	0.0003	0.9171	7.92	8.42	8.48	8.21	0.26	0015_guanosine_negative_M-H282p0844_8p48						489211	3.15076e+06	1.41632e+06	2.55149e+06	369862	2.67151e+06	1.21808e+06
42	histamine	yes	histamine			C5H9N3	positive	111.08	NTYJJOPFIAHURM-UHFFFAOYSA-N	1	1	1	3	Level 1+				perfect match to internal reference library	7068492	20180727_MV_JS_Wildermuth_Diurnal3_20180627re_QE144_Ag683775-924_USHXG01062_POS_MSMS-v2_exudate-EOD-Brachy-5-438-1_IR01_rerun_190.h5	12.0504	20180727_MV_JS_Wildermuth_Diurnal3_20180627re_QE144_Ag683775-924_USHXG01062_POS_MSMS-v2_exudate-EOD-Brachy-4-437-1_IR01__034.h5	12.35	2	95.061,112.087	0.9167	[M+H]+	112.087	112.087	0.0001	1.0145	11.91	12.72	12.05	12.33	0.28	0042_histamine_positive_M+H112p0869_12p05	23237.8	12931.7	8082.98	28351.5	12703	245689	419800	27839.1	25525	16691.8	44459.8	136396
54	histidine	yes	histidine			C6H9N3O2	positive	155.069	HNDVDQJCIGZPNO-YFKPBYRVSA-N	1	1	1	3	Level 1+				perfect match to internal reference library	4655329	20180727_MV_JS_Wildermuth_Diurnal3_20180627re_QE144_Ag683775-924_USHXG01062_POS_MSMS-v2_exudate-EOD-Arabidopsis-6-456-1_IR01__046.h5	14.6997	20180727_MV_JS_Wildermuth_Diurnal3_20180627re_QE144_Ag683775-924_USHXG01062_POS_MSMS-v2_exudate-EON-Arabidopsis-6-456-2_IR01_rerun_166.h5	15.25	2	110.072,156.077	0.9156	[M+H]+	156.077	156.077	0.0002	1.1617	14.85	15.71	14.7	15.1	0.4	0054_L-histidine_positive_M+H156p0768_14p70	17971.4		10549.9	9576.2		1.46319e+06	3.5599e+06	1.29924e+06	885662	195425	4655329	1.42145e+06
43	histidinol	yes	histidinol			C6H11N3O	positive	141.09	ZQISRDCJNBUVMM-YFKPBYRVSA-N	0.5	1	1	2.5	Level 1+				co-isolated precursor partial match	1.27327e+06	20180727_MV_JS_Wildermuth_Diurnal3_20180627re_QE144_Ag683775-924_USHXG01062_POS_MSMS-v2_exudate-EOD-Arabidopsis-2-452-1_IR01__022.h5	12.8105	20180727_MV_JS_Wildermuth_Diurnal3_20180627re_QE144_Ag683775-924_USHXG01062_POS_MSMS-v2_exudate-EOD-Arabidopsis-2-452-1_IR01__022.h5	12.86	1	124.087	0	[M+H]+	142.097	142.097	0.0002	1.1825	12.74	13.11	12.81	12.9	0.09	0043_L-histidinol_positive_M+H142p0975_12p81				9523.5		153272	1.27327e+06	272263	282757	358957	1029714	228669
4	hydroxycinnamic acid	yes	4-coumaric acid	2-hydroxycinnamic acid//4-coumaric acid	PMOWTIHVNWZYFI-AATRIKPKSA-N//NGSWKAQJJWESNS-ZZXKWVIFSA-N	C9H8O3	negative	164.047	NGSWKAQJJWESNS-ZZXKWVIFSA-N	1	1	1	3	Level 1+				co-isolated precursor but all reference ions are in sample spectrum	6.65518e+06	20180727_MV_JS_Wildermuth_Diurnal3_20180627re_QE144_Ag683775-924_USHXG01062_NEG_MSMS-v2_exudate-EOD-Arabidopsis-6-456-1_IR02__047.h5	1.5022	20180727_MV_JS_Wildermuth_Diurnal3_20180627re_QE144_Ag683775-924_USHXG01062_NEG_MSMS-v2_exudate-EOD-Arabidopsis-8-458-1_IR02__011.h5	1.38	2	119.049,163.039	0.336	[M-H]-	163.04	163.039	0.001	5.894	1.27	1.56	1.5	1.43	0.07	0004_p-coumaric_acid_negative_M-H163p0400_1p50	227597	92053	31486.1	187003	65671.3	758123	6127368	2.35801e+06	2.24603e+06	1.52152e+06	6.65518e+06	1.70557e+06
11	hypoxanthine	yes	hypoxanthine			C5H4N4O	positive	136.039	FDGQSTZJBFJUBT-UHFFFAOYSA-N	1	1	1	3	Level 1+				perfect match to internal reference library	186839920	20180727_MV_JS_Wildermuth_Diurnal3_20180627re_QE144_Ag683775-924_USHXG01062_POS_MSMS-v2_exudate-EOD-Arabidopsis-8-458-1_IR01__010.h5	3.04261	20180727_MV_JS_Wildermuth_Diurnal3_20180627re_QE144_Ag683775-924_USHXG01062_POS_MSMS-v2_exudate-EON-Arabidopsis-5-455-2_IR01_rerun_187.h5	2.96	2	94.041,137.046	0.983	[M+H]+	137.046	137.046	0.0002	1.427	2.79	3.23	3.04	2.98	0.06	0011_hypoxanthine_positive_M+H137p0458_3p04	81199.1	120887	41028.8	41280.1	112102	12888236	9017625	4.24734e+06	7.30284e+06	25918090	6064068	11073594
3	indole-3-acetic acid	yes	indole-3-acetic acid			C10H9NO2	positive	175.063	SEOVTRFCIGRIMH-UHFFFAOYSA-N	0.5	1	1	2.5	Level 1+				partial match of fragments	12625929	20180727_MV_JS_Wildermuth_Diurnal3_20180627re_QE144_Ag683775-924_USHXG01062_POS_MSMS-v2_exudate-EOD-Brachy-5-438-1_IR01_rerun_190.h5	1.46761	20180727_MV_JS_Wildermuth_Diurnal3_20180627re_QE144_Ag683775-924_USHXG01062_POS_MSMS-v2_exudate-EON-Brachy-5-438-2_IR01__100.h5	1.43	2	130.065,176.071	0.0896	[M+H]+	176.071	176.07	0.0003	1.4381	1.4	1.55	1.47	1.45	0.02	0003_indole-3-acetic_acid_positive_M+H176p0706_1p47						120610	533555	307121	397809	275766	285017	314595
19	isoleucine	yes	isoleucine			C6H13NO2	negative	131.095	AGPKZVBTJJNPAG-WHFBIAKZSA-N	0.5	1	1	2.5	Level 1+				partial match of fragments	2.08508e+06	20180727_MV_JS_Wildermuth_Diurnal3_20180627re_QE144_Ag683775-924_USHXG01062_NEG_MSMS-v2_exudate-EOD-Arabidopsis-2-452-1_IR02__023.h5	9.60032	20180727_MV_JS_Wildermuth_Diurnal3_20180627re_QE144_Ag683775-924_USHXG01062_NEG_MSMS-v2_exudate-EOD-Arabidopsis-4-454-1_IR02__098.h5	9.53	1	130.087	0	[M-H]-	130.087	130.086	0.0012	9.0274	9.19	9.65	9.6	9.48	0.12	0019_l-isoleucine_negative_M-H130p0873_9p60				6617.02	6012.64	562615	2.08508e+06	1.01049e+06	1.55095e+06	384680	1.49616e+06	451068
13	isomer of 5-methylcytosine	yes	5-methylcytosine			C5H7N3O	positive	125.059	LRSASMSXMSNRBT-UHFFFAOYSA-N	1	1	0.5	2.5	Level 1+			rt shifted, isomer of library ref	perfect match to internal reference library	1.43572e+06	20180727_MV_JS_Wildermuth_Diurnal3_20180627re_QE144_Ag683775-924_USHXG01062_POS_MSMS-v2_exudate-EOD-Brachy-5-438-1_IR01_rerun_190.h5	4.35199	20180727_MV_JS_Wildermuth_Diurnal3_20180627re_QE144_Ag683775-924_USHXG01062_POS_MSMS-v2_exudate-EOD-Brachy-6-439-1_IR01__064.h5	4.95	4	83.061,108.056,109.040,126.066	0.9043	[M+H]+	126.066	126.066	0	0.3941	4.68	5.13	4.35	4.91	0.56	0013_5-Methylcytosine_positive_M+H126p0662_4p35	19273.5	15758.2	9622.03	14874.3	9368.91	426529	1.05794e+06	687658	1.19025e+06	117174	977894	506374
35	isomer of kynurenine	yes	kynurenine			C10H12N2O3	positive	208.085	YGPSJZOEDVAXAB-QMMMGPOBSA-N	0	1	0.5	1.5	NA			rt shifted, isomer of library ref	no ref match available or no MSMS collected	191665	20180727_MV_JS_Wildermuth_Diurnal3_20180627re_QE144_Ag683775-924_USHXG01062_POS_MSMS-v2_exudate-EOD-Brachy-6-439-1_IR01__064.h5	9.34112						[M+H]+	209.092	209.092	0.0002	1.1311	8.61	8.84	9.34	8.72	0.62	0035_L-kynurenine_positive_M+H209p0921_9p34						12102.2		19135.1	14239.9	16971.9	15921	15718.1
17	leucine and/or norleucine	yes	leucine	leucine//norleucine	ROHFNLRQFUQHCH-UHFFFAOYSA-N//LRQKBLKVPFOOQJ-YFKPBYRVSA-N	C6H13NO2	negative	131.095	ROHFNLRQFUQHCH-UHFFFAOYSA-N	0.5	1	1	2.5	Level 1+	unresolvable isomers			partial match of fragments	2.07696e+06	20180727_MV_JS_Wildermuth_Diurnal3_20180627re_QE144_Ag683775-924_USHXG01062_NEG_MSMS-v2_exudate-EOD-Arabidopsis-2-452-1_IR02__023.h5	9.21845	20180727_MV_JS_Wildermuth_Diurnal3_20180627re_QE144_Ag683775-924_USHXG01062_NEG_MSMS-v2_exudate-EOD-Arabidopsis-4-454-1_IR02__098.h5	9.1	1	130.086	0	[M-H]-	130.087	130.086	0.0012	9.1352	8.78	9.18	9.22	9.07	0.15	0017_DL-Leucine_negative_M-H130p0873_9p22				7798.47		298816	2.07696e+06	559314	874125	249345	871044	349829
60	lysine	yes	lysine			C6H14N2O2	positive	146.106	KDXKERNSBIXSRK-YFKPBYRVSA-N	0	1	1	2	Level 1				no ref match available or no MSMS collected	827165	20180727_MV_JS_Wildermuth_Diurnal3_20180627re_QE144_Ag683775-924_USHXG01062_POS_MSMS-v2_exudate-EON-Arabidopsis-4-454-2_IR01__049.h5	16.8321						[M+H]+	147.113	147.113	0.0003	1.9397	16.82	17.02	16.83	16.94	0.11	0060_L-lysine_positive_M+H147p1128_16p83	17042.9	9988.67	14407.1	17250.6	15907.9	229440	281663				185387
0	methyl indole-3-acetic acid	yes	methyl indole-3-acetic acid			C11H11NO2	positive	189.079	KTHADMDGDNYQRX-UHFFFAOYSA-N	0	1	1	2	Level 1				no ref match available or no MSMS collected	4.86941e+06	20180727_MV_JS_Wildermuth_Diurnal3_20180627re_QE144_Ag683775-924_USHXG01062_POS_MSMS-v2_exudate-EOD-Arabidopsis-6-456-1_IR01__046.h5	1.1679						[M+H]+	190.086	190.086	0.0002	1.2043	0.79	1.02	1.17	0.87	0.3	0000_methyl_21H-indol-3-yl_acetate_positive_M+H190p0863_1p17		23903.7	16809.5	13660.2	27890.9	2.19013e+06	3.95253e+06	4.70586e+06	3.45272e+06	3693022	4.86941e+06	2.73092e+06
42	N-acetyl-glutamic acid	yes	N-acetyl-glutamic acid			C7H11NO5	negative	189.064	RFMMMVDNIPUKGG-YFKPBYRVSA-N	0	1	1	2	Level 1				insufficient signal for matching	1.34707e+06	20180727_MV_JS_Wildermuth_Diurnal3_20180627re_QE144_Ag683775-924_USHXG01062_NEG_MSMS-v2_exudate-EOD-Arabidopsis-8-458-1_IR02__011.h5	14.9972	20180727_MV_JS_Wildermuth_Diurnal3_20180627re_QE144_Ag683775-924_USHXG01062_NEG_MSMS-v2_exudate-EOD-Arabidopsis-5-455-1_IR02__056.h5	14.96	0		1.08511e+06	[M-H]-	188.056	188.056	0.0008	4.0532	14.82	15.17	15	14.96	0.04	0042_N-Acetyl-L-glutamic_acid_negative_M-H188p0564_15p00	86332.4	17312.6	7340.87	27828.8	7768.33	342234	1.23655e+06	862711	467405	830815	422245	328781
21	N-acetyl-hexosamine	yes	N-acetyl-galactosamine	N-acetyl-galactosamine//N-acetyl-glucosamine//N-acetyl-mannosamine	OVRNDRQMDRJTHS-CBQIKETKSA-N//OVRNDRQMDRJTHS-RTRLPJTCSA-N//OVRNDRQMDRJTHS-ZTVVOAFPSA-N	C8H15NO6	positive	221.09	OVRNDRQMDRJTHS-CBQIKETKSA-N	0	1	1	2	Level 1				no ref match available or no MSMS collected	1.10332e+06	20180727_MV_JS_Wildermuth_Diurnal3_20180627re_QE144_Ag683775-924_USHXG01062_POS_MSMS-v2_exudate-EOD-Arabidopsis-8-458-1_IR01__010.h5	6.30566						[M+H]+	222.097	222.097	0.0003	1.1996	6.08	7.36	6.31	6.6	0.29	0021_alpha-GalNAc_positive_M+H222p0972_6p31			13183.1			497914	541631	279164	359812	96548.6	531788	353811
27	n-alpha-acetyl-asparagine	yes	n-alpha-acetyl-asparagine			C6H10N2O4	negative	174.064	HXFOXFJUNFFYMO-BYPYZUCNSA-N	0	1	1	2	Level 1				no ref match available or no MSMS collected	925949	20180727_MV_JS_Wildermuth_Diurnal3_20180627re_QE144_Ag683775-924_USHXG01062_NEG_MSMS-v2_exudate-EOD-Arabidopsis-2-452-1_IR02__023.h5	13.0865						[M-H]-	173.057	173.056	0.0006	3.6038	12.76	12.98	13.09	12.88	0.2	0027_4033-40-3_negative_M-H173p0568_13p09				5796.63		89942.4	925949	86352.2	184767	97568.5	568103	65149.7
58	N-trimethyllysine	yes	N-trimethyllysine			C9H21N2O2+	positive	189.16	MXNRLFUSFKVQSK-QMMMGPOBSA-O	1	1	1	3	Level 1+				perfect match to internal reference library	6682112	20180727_MV_JS_Wildermuth_Diurnal3_20180627re_QE144_Ag683775-924_USHXG01062_POS_MSMS-v2_exudate-EOD-Arabidopsis-2-452-1_IR01__022.h5	16.6359	20180727_MV_JS_Wildermuth_Diurnal3_20180627re_QE144_Ag683775-924_USHXG01062_POS_MSMS-v2_exudate-EON-Arabidopsis-6-456-2_IR01_rerun_166.h5	16.62	4	60.082,84.081,130.086,189.160	0.9161	[M]+	189.16	189.159	0.0003	1.772	16.48	16.9	16.64	16.73	0.09	0058_Trimethyllysine_positive_M189p1598_16p64						749626	6682112	2.27122e+06	3.9941e+06	583827	4181590	2.09725e+06
1	nicotinamide	yes	nicotinamide			C6H6N2O	positive	122.048	DFPAKSUCGFBDDF-UHFFFAOYSA-N	1	1	1	3	Level 1+				perfect match to internal reference library	4599532	20180727_MV_JS_Wildermuth_Diurnal3_20180627re_QE144_Ag683775-924_USHXG01062_POS_MSMS-v2_exudate-EOD-Brachy-2-434-1_IR01__106.h5	1.20526	20180727_MV_JS_Wildermuth_Diurnal3_20180627re_QE144_Ag683775-924_USHXG01062_POS_MSMS-v2_exudate-EON-Brachy-7-440-2_IR01__028.h5	1.19	4	80.050,96.045,106.029,123.056	0.6392	[M+H]+	123.055	123.055	0	0.069	1.14	1.23	1.21	1.18	0.03	0001_nicotinamide_positive_M+H123p0553_1p21	127450	117298	82370.1	66248	91619.5	1.04417e+06	2328484	2.47784e+06	3.07881e+06	1.55902e+06	1.5998e+06	1.35391e+06
19	nicotinic acid and/or isonicotinic acid	yes	isonicotinic acid	isonicotinic acid//nicotinic acid	TWBYWOBDOCUKOW-UHFFFAOYSA-N//PVNIIMVLHYAWGP-UHFFFAOYSA-N	C6H5NO2	positive	123.032	TWBYWOBDOCUKOW-UHFFFAOYSA-N	1	1	1	3	Level 1+			multiple, unresolvable peaks	perfect match to internal reference library	4641901	20180727_MV_JS_Wildermuth_Diurnal3_20180627re_QE144_Ag683775-924_USHXG01062_POS_MSMS-v2_exudate-EOD-Arabidopsis-4-454-1_IR01__097.h5	5.91887	20180727_MV_JS_Wildermuth_Diurnal3_20180627re_QE144_Ag683775-924_USHXG01062_POS_MSMS-v2_exudate-EOD-Arabidopsis-4-454-1_IR01__097.h5	6.12	3	80.050,96.045,124.040	0.9483	[M+H]+	124.039	124.039	0	0.1127	5.53	6.99	5.92	6.16	0.24	0019_ISONICOTINIC_ACID_positive_M+H124p0393_5p92	49819.8	37013.2	28009.2	17202.2	18089.1	2.02794e+06	2.1769e+06	2.49339e+06	4641901	825793	2.33621e+06	1.19227e+06
22	pantothenic acid	yes	pantothenic acid			C9H17NO5	positive	219.111	GHOKWGTUZJEAQD-ZETCQYMHSA-N	1	1	1	3	Level 1+				perfect match to internal reference library	11596412	20180727_MV_JS_Wildermuth_Diurnal3_20180627re_QE144_Ag683775-924_USHXG01062_POS_MSMS-v2_exudate-EOD-Arabidopsis-2-452-1_IR01__022.h5	6.84604	20180727_MV_JS_Wildermuth_Diurnal3_20180627re_QE144_Ag683775-924_USHXG01062_POS_MSMS-v2_exudate-EOD-Arabidopsis-2-452-1_IR01__022.h5	6.55	3	90.056,202.107,220.118	0.6794	[M+H]+	220.118	220.118	0.0002	1.061	6.06	7.06	6.85	6.67	0.17	0022_pantothenic_acid_positive_M+H220p1180_6p85	23029.4			19667.3	10510.9	2.37677e+06	11596412	5.87244e+06	8398988	1.63864e+06	8905380	6680924
31	phenylalanine	yes	phenylalanine			C9H11NO2	positive	165.079	COLNVLDHVKWLRT-QMMMGPOBSA-N	1	1	1	3	Level 1+				perfect match to internal reference library	41720260	20180727_MV_JS_Wildermuth_Diurnal3_20180627re_QE144_Ag683775-924_USHXG01062_POS_MSMS-v2_exudate-EOD-Arabidopsis-2-452-1_IR01__022.h5	8.86133	20180727_MV_JS_Wildermuth_Diurnal3_20180627re_QE144_Ag683775-924_USHXG01062_POS_MSMS-v2_exudate-EON-Arabidopsis-2-452-2_IR01_rerun_163.h5	8.64	6	78.985,96.996,120.012,120.081,148.079,166.090	0.7779	[M+H]+	166.086	166.086	0.0001	0.7941	8.5	8.89	8.86	8.78	0.08	0031_L-phenylalanine_positive_M+H166p0863_8p86				17504.6		3.56987e+06	41720260	9545346	8907674	5656536	20715344	7.04074e+06
39	pipecolic acid	yes	pipecolic acid			C6H11NO2	positive	129.079	HXEACLLIILLPRG-YFKPBYRVSA-N	0	1	1	2	Level 1				insufficient signal for matching	857790	20180727_MV_JS_Wildermuth_Diurnal3_20180627re_QE144_Ag683775-924_USHXG01062_POS_MSMS-v2_exudate-EOD-Arabidopsis-8-458-1_IR01__010.h5	10.851	20180727_MV_JS_Wildermuth_Diurnal3_20180627re_QE144_Ag683775-924_USHXG01062_POS_MSMS-v2_exudate-EOD-Arabidopsis-5-455-1_IR01__055.h5	10.86	1	84.081	0	[M+H]+	130.086	130.086	0.0001	0.7164	10.65	11	10.85	10.83	0.02	0039_l-Pipecolic_acid_positive_M+H130p0863_10p85	12806.2	8333.91	7591.08	14795.3	12144.3	817445	389582	297886	286991	790121	240567	227570
38	proline	yes	proline			C5H9NO2	positive	115.063	ONIBWKKTOPOVIA-BYPYZUCNSA-N	1	1	1	3	Level 1+				co-isolated precursor but all reference ions are in sample spectrum	4.98609e+06	20180727_MV_JS_Wildermuth_Diurnal3_20180627re_QE144_Ag683775-924_USHXG01062_POS_MSMS-v2_exudate-EOD-Arabidopsis-2-452-1_IR01__022.h5	10.8024	20180727_MV_JS_Wildermuth_Diurnal3_20180627re_QE144_Ag683775-924_USHXG01062_POS_MSMS-v2_exudate-EON-Arabidopsis-2-452-2_IR01_rerun_163.h5	10.66	2	70.066,116.071	0.7722	[M+H]+	116.071	116.071	0.0001	0.4625	10.59	10.92	10.8	10.76	0.05	0038_L-proline_positive_M+H116p0706_10p80				10967.8		1.50548e+06	4.98609e+06	1.03538e+06	670678	513840	1.95963e+06	514374
7	pyridoxine	yes	pyridoxine			C8H11NO3	positive	169.074	LXNHXLLTXMVWPM-UHFFFAOYSA-N	1	1	1	3	Level 1+				co-isolated precursor but all reference ions are in sample spectrum	23354500	20180727_MV_JS_Wildermuth_Diurnal3_20180627re_QE144_Ag683775-924_USHXG01062_POS_MSMS-v2_exudate-EOD-Arabidopsis-2-452-1_IR01__022.h5	2.12408	20180727_MV_JS_Wildermuth_Diurnal3_20180627re_QE144_Ag683775-924_USHXG01062_POS_MSMS-v2_exudate-EON-Arabidopsis-3-453-2_IR01_rerun_160.h5	2.06	3	134.060,152.071,170.084	0.7852	[M+H]+	170.081	170.081	0.0003	1.6094	2	2.4	2.12	2.09	0.04	0007_pyridoxine_positive_M+H170p0812_2p12	73622.6	54602.7	16240.4	25168	31005.4	6.371e+06	23354500	9721357	13659244	6.86874e+06	12969146	7463429
26	quinic acid	yes	quinic acid			C7H12O6	negative	192.063	AAWZDTNXLSGCEK-LNVDRNJUSA-N	1	1	1	3	Level 1+				perfect match to internal reference library	786585	20180727_MV_JS_Wildermuth_Diurnal3_20180627re_QE144_Ag683775-924_USHXG01062_NEG_MSMS-v2_exudate-EOD-Brachy-1-433-1_IR02__053.h5	13.023	20180727_MV_JS_Wildermuth_Diurnal3_20180627re_QE144_Ag683775-924_USHXG01062_NEG_MSMS-v2_exudate-EOD-Brachy-1-433-1_IR02__053.h5	13.1	4	85.028,93.033,173.045,191.055	0.8567	[M-H]-	191.056	191.055	0.0007	3.5462	12.72	13.4	13.02	12.94	0.08	0026_quinic_acid_negative_M-H191p0561_13p02	60905.5	26830.8	8063.34	16823.1	7572.13	65091.3	234674	91471.9	52926.1	65408.8	216859	73006.9
6	salicylic acid	yes	salicylic acid			C7H6O3	negative	138.032	YGSDEFSMJLZEOE-UHFFFAOYSA-N	0	1	1	2	Level 1				no ref match available or no MSMS collected	1.36564e+06	20180727_MV_JS_Wildermuth_Diurnal3_20180627re_QE144_Ag683775-924_USHXG01062_NEG_MSMS-v2_exudate-EOD-Arabidopsis-2-452-1_IR02__023.h5	2.16737						[M-H]-	137.024	137.023	0.0012	9.0687	2.16	2.67	2.17	2.37	0.2	0006_Salicylate_negative_M-H137p0244_2p17	73519.1	30046.5	18466.6	39269.2	12392.6	554060	1.36564e+06	288682	335009	370935	620530	631111
34	serine	yes	serine			C3H7NO3	negative	105.043	MTCFGRXMJLQNBG-REOHCLBHSA-N	0	1	1	2	Level 1				no ref match available or no MSMS collected	631319	20180727_MV_JS_Wildermuth_Diurnal3_20180627re_QE144_Ag683775-924_USHXG01062_NEG_MSMS-v2_exudate-EOD-Arabidopsis-2-452-1_IR02__023.h5	14.17						[M-H]-	104.035	104.034	0.0014	13.001	13.97	14.54	14.17	14.14	0.03	0034_L-serine_negative_M-H104p0353_14p17	32903.7	9614.69	12898.9	45787	18153.3	445736	631319	182482	113201	85575.9	238906	79465.9
55	sn-glycero-3-phosphocholine	yes	sn-glycero-3-phosphocholine			C8H21NO6P+	positive	258.11	SUHOQUVVVLNYQR-MRVPVSSYSA-O	1	1	1	3	Level 1+				perfect match to internal reference library	9162856	20180727_MV_JS_Wildermuth_Diurnal3_20180627re_QE144_Ag683775-924_USHXG01062_POS_MSMS-v2_exudate-EOD-Medicago-1-442-1_IR01__019.h5	14.7601	20180727_MV_JS_Wildermuth_Diurnal3_20180627re_QE144_Ag683775-924_USHXG01062_POS_MSMS-v2_exudate-EOD-Arabidopsis-1-451-1_IR01_rerun_181.h5	15.03	6	60.082,86.097,104.107,125.000,184.074,258.110	0.9375	[M]+	258.11	258.11	0.0005	1.9135	14.84	15.17	14.76	15	0.24	0055_Glycerophosphocholine_positive_M258p1101_14p76						2.75296e+06	3.12157e+06	2.20432e+06	2.41726e+06	1595374	3.58819e+06	1.5585e+06
30	threonine/allothreonine	yes	threonine	allothreonine//threonine	AYFVYJQAPQTCCC-HRFVKAFMSA-N//AYFVYJQAPQTCCC-GBXIJSLDSA-N	C4H9NO3	negative	119.058	AYFVYJQAPQTCCC-GBXIJSLDSA-N	0	1	1	2	Level 1	unresolvable isomers			no ref match available or no MSMS collected	964826	20180727_MV_JS_Wildermuth_Diurnal3_20180627re_QE144_Ag683775-924_USHXG01062_NEG_MSMS-v2_exudate-EON-Arabidopsis-2-452-2_IR02_rerun_164.h5	13.3461						[M-H]-	118.051	118.05	0.0013	11.0702	13.07	13.51	13.35	13.28	0.07	0030_L-threonine_negative_M-H118p0509_13p35	9556.26		5934.58	16825.4	6206.78	530347	810035	170301	196058	93742.4	413406	102954
1	thymine	yes	thymine			C5H6N2O2	negative	126.043	RWQNBRDOKXIBIV-UHFFFAOYSA-N	0	1	1	2	Level 1				no ref match available or no MSMS collected	1.83208e+06	20180727_MV_JS_Wildermuth_Diurnal3_20180627re_QE144_Ag683775-924_USHXG01062_NEG_MSMS-v2_exudate-EOD-Arabidopsis-8-458-1_IR02__011.h5	1.23578						[M-H]-	125.036	125.034	0.0011	9.131	1.17	1.23	1.24	1.19	0.04	0001_thymine_negative_M-H125p0356_1p24				14347.7		135943	316813	240882	160416	691310	495232	116707
0	trans-cinnamic acid	yes	trans-cinnamic acid			C9H8O2	negative	148.052	WBYWAXJHAXSJNI-VOTSOKGWSA-N	1	1	1	3	Level 1+				perfect match to internal reference library	3.76608e+06	20180727_MV_JS_Wildermuth_Diurnal3_20180627re_QE144_Ag683775-924_USHXG01062_NEG_MSMS-v2_exudate-EON-Arabidopsis-7-457-2_IR02__038.h5	1.12799	20180727_MV_JS_Wildermuth_Diurnal3_20180627re_QE144_Ag683775-924_USHXG01062_NEG_MSMS-v2_exudate-EON-Arabidopsis-3-453-2_IR02_rerun_161.h5	1.04	4	61.987,93.033,119.049,147.044	0.632	[M-H]-	147.045	147.044	0.001	6.6441	0.97	1.15	1.13	1.04	0.08	0000_CINNAMIC_ACID_negative_M-H147p0451_1p13	12112.8			4387.05	5025.71	137636	671585	443521	430280	316944	1.16878e+06	495758
30	trigonelline	yes	trigonelline			C7H8NO2+	positive	138.055	WWNNZCOKKKDOPX-UHFFFAOYSA-O	1	1	1	3	Level 1+				perfect match to internal reference library	43637416	20180727_MV_JS_Wildermuth_Diurnal3_20180627re_QE144_Ag683775-924_USHXG01062_POS_MSMS-v2_exudate-EOD-Medicago-1-442-1_IR01__019.h5	8.67885	20180727_MV_JS_Wildermuth_Diurnal3_20180627re_QE144_Ag683775-924_USHXG01062_POS_MSMS-v2_exudate-EOD-Medicago-1-442-1_IR01__019.h5	8.92	5	92.050,94.066,96.045,110.060,138.055	0.9287	[M]+	138.055	138.055	0.0001	1.0709	8.6	9.09	8.68	8.81	0.13	0030_3-carboxy-1-methylpyridinium_positive_M138p0550_8p68	16231.3	13336.8	13943.7		10038.9	148802	2534049	495444	366436	197216	1.62944e+06	443738
41	tyrosine	yes	tyrosine			C9H11NO3	positive	181.074	OUYCCCASQSFEME-QMMMGPOBSA-N	0	1	1	2	Level 1				no ref match available or no MSMS collected	1.06548e+06	20180727_MV_JS_Wildermuth_Diurnal3_20180627re_QE144_Ag683775-924_USHXG01062_POS_MSMS-v2_exudate-EOD-Arabidopsis-2-452-1_IR01__022.h5	11.7063						[M+H]+	182.081	182.081	0.0002	0.8295	11.36	11.84	11.71	11.57	0.13	0041_L-tyrosine_positive_M+H182p0812_11p71						161424	1.06548e+06	165725	306106	94756.6	650633	166872
3	uracil	yes	uracil			C4H4N2O2	negative	112.027	ISAKRJDGNUQOIC-UHFFFAOYSA-N	0.5	1	1	2.5	Level 1+				partial match of fragments	12816272	20180727_MV_JS_Wildermuth_Diurnal3_20180627re_QE144_Ag683775-924_USHXG01062_NEG_MSMS-v2_exudate-EOD-Arabidopsis-8-458-1_IR02__011.h5	1.37285	20180727_MV_JS_Wildermuth_Diurnal3_20180627re_QE144_Ag683775-924_USHXG01062_NEG_MSMS-v2_exudate-EOD-Arabidopsis-8-458-1_IR02__011.h5	1.32	2	110.974,111.019	0.3847	[M-H]-	111.02	111.019	0.0013	11.4743	1.28	1.4	1.37	1.33	0.05	0003_uracil_negative_M-H111p0200_1p37	16386.4			10423.8		1.33558e+06	2612472	433053	330691	908946	1.32472e+06	415326
9	uridine	yes	uridine			C9H12N2O6	negative	244.07	DRTQHJPVMGBUCF-XVFCMESISA-N	1	1	1	3	Level 1+				co-isolated precursor but all reference ions are in sample spectrum	3222199	20180727_MV_JS_Wildermuth_Diurnal3_20180627re_QE144_Ag683775-924_USHXG01062_NEG_MSMS-v2_exudate-EOD-Arabidopsis-4-454-1_IR02__098.h5	2.85292	20180727_MV_JS_Wildermuth_Diurnal3_20180627re_QE144_Ag683775-924_USHXG01062_NEG_MSMS-v2_exudate-EOD-Arabidopsis-4-454-1_IR02__098.h5	2.76	3	110.024,200.056,243.062	0.5773	[M-H]-	243.062	243.062	0	0.1332	2.47	3	2.85	2.66	0.19	0009_uridine_negative_M-H243p0622_2p85						501916	2.63825e+06	1.14233e+06	3222199	159502	1.58975e+06	1.21782e+06
23	valine and/or norvaline	yes	valine	norvaline//valine	SNDPXSYFESPGGJ-BYPYZUCNSA-N//KZSNJWFQEVHDMF-BYPYZUCNSA-N	C5H11NO2	negative	117.079	KZSNJWFQEVHDMF-BYPYZUCNSA-N	1	1	1	3	Level 1+			multiple, unresolvable peaks	perfect match to internal reference library	3.55054e+06	20180727_MV_JS_Wildermuth_Diurnal3_20180627re_QE144_Ag683775-924_USHXG01062_NEG_MSMS-v2_exudate-EOD-Arabidopsis-2-452-1_IR02__023.h5	10.9966	20180727_MV_JS_Wildermuth_Diurnal3_20180627re_QE144_Ag683775-924_USHXG01062_NEG_MSMS-v2_exudate-EOD-Arabidopsis-3-453-1_IR02__086.h5	10.83	4	99.925,115.919,116.070,116.927	0.6761	[M-H]-	116.072	116.07	0.0012	10.555	10.63	10.98	11	10.83	0.16	0023_L-valine_negative_M-H116p0717_11p00	6126.81			10262.6	4295.41	832605	3.55054e+06	1.46141e+06	1.63009e+06	465049	1.70618e+06	683556
8	xanthine	yes	xanthine			C5H4N4O2	negative	152.033	LRFVTYWOQMYALW-UHFFFAOYSA-N	1	1	1	3	Level 1+				perfect match to internal reference library	2.47663e+06	20180727_MV_JS_Wildermuth_Diurnal3_20180627re_QE144_Ag683775-924_USHXG01062_NEG_MSMS-v2_exudate-EOD-Arabidopsis-2-452-1_IR02__023.h5	2.69099	20180727_MV_JS_Wildermuth_Diurnal3_20180627re_QE144_Ag683775-924_USHXG01062_NEG_MSMS-v2_exudate-EON-Arabidopsis-5-455-2_IR02_rerun_188.h5	2.63	2	108.019,151.025	0.9894	[M-H]-	151.026	151.025	0.001	6.6671	2.37	2.91	2.69	2.61	0.08	0008_xanthine_negative_M-H151p0261_2p69		11836.9			5842.7	1.32463e+06	2.47663e+06	1512021	2.43805e+06	2.14114e+06	1.82197e+06	1.65851e+06
	red: excluded due to low signal in samples compared to blanks
[truncated: 37 more columns]

## Sheet: Stats
Anova/Tukey tests for different datasets, lists of significantly different metabolites
Timecourse
sample name	timing
Brachy-0	0 h
Brachy-1	0.5 h
Brachy-2	2 h
Brachy-4	4 h
Brachy-8	1 d
Brachy-9	4 d
pairwise comparisons
Brachy-0	Brachy-0	Brachy-0	Brachy-0	Brachy-0	Brachy-2	Brachy-2	Brachy-2	Brachy-2	Brachy-4	Brachy-4	Brachy-4	Brachy-8	Brachy-8	Brachy-9
Brachy-2	Brachy-4	Brachy-8	Brachy-9	Brachy-1	Brachy-4	Brachy-8	Brachy-9	Brachy-1	Brachy-8	Brachy-9	Brachy-1	Brachy-9	Brachy-1	Brachy-1
3	1	7	16	2	0	9	19	0	6	16	3	13	9	19
5'-methylthioadenosine	5'-methylthioadenosine	5'-methylthioadenosine	3-methoxytyramine	5'-methylthioadenosine		adenine	3-methoxytyramine		adenine	4-guanidinobutanoic acid	betaine	4-guanidinobutanoic acid	adenine	3-methoxytyramine
deoxycarnitine		adenine	4-guanidinobutanoic acid	guanine		an hydroxycinnamic acid	4-guanidinobutanoic acid		an hydroxycinnamic acid	4-pyridoxic acid	guanine	4-pyridoxic acid	an hydroxycinnamic acid	4-guanidinobutanoic acid
guanine		betaine	4-quinolinecarboxylic acid			betaine	4-pyridoxic acid		ferulic acid	4-quinolinecarboxylic acid	hypoxanthine	4-quinolinecarboxylic acid	betaine	4-pyridoxic acid
		ferulic acid	5-methylcytosine			deoxycarnitine	4-quinolinecarboxylic acid		guanine	5-methylcytosine		5-methylcytosine	ferulic acid	4-quinolinecarboxylic acid
		guanine	adenine			ferulic acid	5-methylcytosine		hypoxanthine	adenine		cytosine	guanine	5-methylcytosine
		hypoxanthine	betaine			guanine	adenine		vanillic acid	cytosine		deoxycarnitine	hypoxanthine	adenine
		thymidine	cytosine			hypoxanthine	betaine			deoxycarnitine		dethiobiotin	thymidine	betaine
			deoxycarnitine			unidentified isomer of cytidine	cytosine			dethiobiotin		ferulic acid	unidentified isomer of cytidine	cytosine
			dethiobiotin			vanillic acid	deoxycarnitine			guanine		guanine	vanillic acid	deoxycarnitine
			guanine				dethiobiotin			homovanillic acid		homovanillic acid		dethiobiotin
			homovanillic acid				guanine			N-acetyl-hexosamine		N-acetyl-phenylalanine		guanine
			hypoxanthine				homovanillic acid			N-acetyl-phenylalanine		pantothenic acid		homovanillic acid
			N-acetyl-phenylalanine				hypoxanthine			pantothenic acid		pyridoxine		hypoxanthine
			pyridoxine				N-acetyl-hexosamine			pyridoxine				N-acetyl-hexosamine
			thymidine				N-acetyl-phenylalanine			thymidine				N-acetyl-phenylalanine
			unidentified isomer of cytidine				pantothenic acid			unidentified isomer of cytidine				pantothenic acid
							pyridoxine							pyridoxine
							thymidine							thymidine
							unidentified isomer of cytidine							unidentified isomer of cytidine
Environments
sucrose	sucrose	nonsterile
nonsterile	sterile	sterile
68	37	53
2- or 4-hydroxybenzoic acid	2-hydroxypyridine and/or isomers	2- or 4-hydroxybenzoic acid
2-hydroxypyridine and/or isomers	2'-deoxyadenosine	2-methylmaleic acid
2-methylmaleic acid	2'-deoxyguanosine	4-aminobutanoic acid
2'-deoxyadenosine	3-amino-4-hydroxybenzoic acid	4-guanidinobutanoic acid
2'-deoxyguanosine	3-hydroxybenzoic acid	4-hydroxy-2-quinolinecarboxylic acid
2',3'-cyclic AMP	4-aminobutanoic acid	4-hydroxyphenylacetic acid
3-hydroxybenzoic acid	allantoin	4-pyridoxic acid
3-methyladenine and/or isomers	aspartic acid and/or isomers	4-quinolinecarboxylic acid and/or isomers
4-guanidinobutanoic acid	C6 sugar alcohol peak 1 (ex. sorbitol)	5-methylcytosine
4-hydroxy-2-quinolinecarboxylic acid	C6 sugar alcohol peak 2 (ex. mannitol, galactitol)	5-oxo-proline
4-hydroxyphenylacetic acid	citrulline	alanine
4-imidazoleacetic acid	deoxyuridine	allantoin
4-pyridoxic acid	dihexose (ex. sucrose, palatinose, maltose, cellobiose, trehalose, melibiose)	asparagine
4-quinolinecarboxylic acid and/or isomers	glutamic acid	aspartic acid and/or isomers
5-methylcytosine	glutamine	azelaic acid
5-oxo-proline	glyceric acid and/or isomers	betaine and/or isomers
alanine	hexosamine	cytidine
allantoin	hexose phosphate	cytosine
aspartic acid and/or isomers	histidine	ferulic acid
azelaic acid	Isomer of dopamine	fumaric acid and/or isomers
betaine and/or isomers	lysine	glutamine
C6 sugar alcohol peak 1 (ex. sorbitol)	methyl indole-3-acetic acid	glyceraldehyde or lactic acid
C6 sugar alcohol peak 2 (ex. mannitol, galactitol)	methylglutaric acid	guanine
cytidine	N-acetyl-alanine and/or isomers	guanosine
cytosine	N-acetyl-aspartic acid	histamine
deoxycytidine	N-acetyl-glutamic acid and/or isomers	histidine
dihexose (ex. sucrose, palatinose, maltose, cellobiose, trehalose, melibiose)	N-acetyl-hexosamine	histidinol
ferulic acid	N-acetyl-serine	hydroxybutyric acid
fumaric acid and/or isomers	N-methyl-glutamic acid	Isomer of dopamine
glutamic acid	nicotinic acid	leucine/norleucine/isoleucine
glyceraldehyde or lactic acid	ornithine	malic acid and/or isomers
glyceric acid and/or isomers	quinic acid	methionine
guanine	sn-glycero-3-phosphocholine	methyl indole-3-acetic acid
hexosamine	taurine	N-acetyl-alanine and/or isomers
histamine	thymidine	N-acetyl-hexosamine
histidine	uridine	nicotinic acid
histidinol	xanthosine	ornithine
hydroxybutyric acid		pantothenic acid
inosine		pyridoxamine
isonicotinic acid or isomer		pyridoxine
leucine/norleucine/isoleucine		serine
lysine		suberic acid
malic acid and/or isomers		syringic acid and/or isomers
methionine		trans-cinnamic acid
methylglutaric acid		trigonelline
N-acetyl-alanine and/or isomers		tryptophan
N-acetyl-aspartic acid		tyramine
N-acetyl-glutamic acid and/or isomers		tyrosine
N-acetyl-serine		uracil
N-methyl-glutamic acid		uronic acid
pantothenic acid		valine
phenylalanine		vanillic acid
pyridoxamine		xanthosine
pyridoxine
quinic acid
suberic acid
syringic acid and/or isomers
taurine
thymidine
trans-cinnamic acid
trigonelline
tryptophan
tyramine
tyrosine
uracil
uridine
uronic acid
vanillic acid
Diurnal tissues
root-Arabidopsis	root-Arabidopsis	root-Brachy	shoot-Arabidopsis	shoot-Arabidopsis	shoot-Brachy
root-Brachy	root-Medicago	root-Medicago	shoot-Brachy	shoot-Medicago	shoot-Medicago
39	29	28	96	56	96
1-methyl-6,7-dihydroxy-1,2,3,4-tetrahydroisoquinoline	1-methyl-6,7-dihydroxy-1,2,3,4-tetrahydroisoquinoline	2-amino-2-methylpropanoic acid	2-amino-2-methylpropanoic acid	2-phosphoglyceric acid	2-phosphoglyceric acid
2-amino-2-methylpropanoic acid	3-dehydroshikimic acid and or isomers	3-hydroxyanthranilic acid	2'-deoxyadenosine	3-dehydroshikimic acid and or isomers	2'-deoxyadenosine
3-hydroxyanthranilic acid	3-methoxytyramine and or isomers	isomer of 3-methoxy-4-hydroxymandelic acid	2',3'-cyclic AMP	3-methoxytyramine and or isomers	2',3'-cyclic AMP
isomer of 3-methoxy-4-hydroxymandelic acid	5'-methylthioadenosine	3-methyl-histidine	3-dehydroshikimic acid and or isomers	4-aminobutanoic acid	3-hydroxyanthranilic acid
3-methyl-histidine	deoxycytidine	4-aminobutanoic acid	3-hydroxyanthranilic acid	4-hydroxyproline	isomer of 3-methoxy-4-hydroxymandelic acid
4-aminobutanoic acid	dopamine	4-hydroxyproline	isomer of 3-methoxy-4-hydroxymandelic acid	4-imidazoleacetic acid	3-methyglutaric acid
4-guanidinobutanoic acid	glutamic acid	arginine	3-methoxytyramine and or isomers	5-oxo-proline and/or isomers	3-methyl-histidine
4-hydroxyproline	glyceric acid and or isomers	azelaic acid	3-methyglutaric acid	adenosine 5'-monophosphoric acid	4-acetamidobutanoic acid
5'-methylthioadenosine	maleamic acid	caffeic acid	3-methyl-histidine	allantoin	4-aminobutanoic acid
agmatine sulfuric acid	mevalonic acid	citrulline	4-acetamidobutanoic acid	arginine	4-guanidinobutanoic acid
alanine	N-acetyl-hexosamine	cytidine	4-hydroxy-2-quinolinecarboxylic acid	betaine	4-hydroxy-2-quinolinecarboxylic acid
arginine	N-acetylneuraminic acid	deoxycytidine	4-hydroxyproline	caffeic acid	4-hydroxyproline
azelaic acid	nicotinamide mononucleotide	dethiobiotin	4-imidazoleacetic acid	choline and or isomers	4-imidazoleacetic acid
caffeic acid	orotic acid	dopamine	4-pyridoxic acid	cysteic acid	4-pyridoxic acid
cytidine	pipecolic acid	guanine	5-hydroxyindoleacetic acid	deoxycytidine	5-methylcytosine
dethiobiotin	putrescine	guanosine 3',5'-cyclic monophosphoric acid	5-methylcytosine	dopamine	adenosine 5'-monophosphoric acid
glutamic acid	pyridoxamine	hexosamine	5-oxo-proline and/or isomers	ferulic acid	agmatine sulfuric acid
guanine	pyruvic acid	mevalonic acid	5'-methylthioadenosine	glucuronic acid	alanine
guanosine 3',5'-cyclic monophosphoric acid	quinic acid	o-acetyl-serine	agmatine sulfuric acid	glutamic acid	allantoin
hexosamine	riboflavin	sphinganine	alanine	glutamine	arginine
N-acetyl-hexosamine	serine	threonine/allothreonine	allantoin	glutathione	asparagine
N-acetylneuraminic acid	tryptophan	trigonelline	alpha-aminoadipic acid	glyceric acid and or isomers	aspartic acid
nicotinamide mononucleotide	tyramine and or isomers	tyramine and or isomers	asparagine	glycine	azelaic acid
o-acetyl-serine	uracil	uric acid and or isomers	aspartic acid	histidinol	biliverdin
orotic acid	uridine	uridine	azelaic acid	indole-3-acetic acid	caffeic acid
pipecolic acid	uridine-5-monophosphoric acid	uridine-5-monophosphoric acid	betaine	kynurenine	carnosine
pyruvic acid	vanillic acid	vanillic acid	biliverdin	leucine and/or norleucine	choline and or isomers
riboflavin	xanthosine	xanthurenic acid	caffeic acid	maleamic acid	citrulline
sphinganine	xanthurenic acid		carnosine	mevalonic acid	cysteic acid
threonine/allothreonine			choline and or isomers	N-acetyl-alanine	cytosine
trigonelline			citrulline	N-acetyl-hexosamine	dAMP
tryptophan			cytidine 2',3'-cyclic mono-phosphoric acid	N-acetylneuraminic acid	deoxycytidine
uracil			cytosine	N-acetylserotonin	dihexose pk 1 (ex. sucrose, palatinose)
uric acid and or isomers			dAMP	n-alpha-acetyl-asparagine	dihexose pk 2 (ex. maltose, cellobiose)
uridine 5'-diphosphoric acid and or isomers			deoxycytidine	NAD+	dihexose pk 3 (ex. trehalose)
valine			dihexose pk 1 (ex. sucrose, palatinose)	nicotinamide	dopamine
vanillic acid			dihexose pk 2 (ex. maltose, cellobiose)	nicotinamide mononucleotide	ferulic acid
xanthosine			dihexose pk 3 (ex. trehalose)	nicotinic acid and/or isonicotinic acid	fumaric acid
xanthurenic acid			ferulic acid	ornithine	gluconic acid
			fumaric acid	phenylalanine	glucuronic acid
			gluconic acid	pyridoxine	glucuronolactone
			glucuronic acid	pyruvic acid	glutamine
			glucuronolactone	quinic acid	glutathione
			glutamic acid	riboflavin	glyceraldehyde and/or lactic acid
			glutathione	S-(5'-adenosyl)-methionine	glyceric acid and or isomers
			glyceraldehyde and/or lactic acid	serine	glycerol phosphoric acid
			glycerol phosphoric acid	shikimic acid and or isomers	glycine
			guanosine	syringic acid	guanosine
			hexosamine	trigonelline	hexosamine
			hexose phosphate	tyramine and or isomers	histamine
			histamine	uracil	histidine
			histidinol	uridine 5'-diphosphohexose	histidinol
			hypoxanthine	uridine-5-monophosphoric acid	homoserine
			indole-3-acetic acid	vanillic acid	hydroxycinnamic acid
			isoleucine	xanthine	hypoxanthine
			isomer of deoxycarnitine	xanthosine	indole-3-acetic acid
			kynurenine		inosine
			leucine and/or norleucine		isoleucine
			lumichrome		isomer of deoxycarnitine
			maleamic acid		lumichrome
			methyl indole-3-acetic acid		methyl indole-3-acetic acid
			N-acetyl-alanine		mevalonic acid
			N-acetyl-glutamic acid		N-acetyl-alanine
			N-acetyl-hexosamine		N-acetyl-glutamic acid
			N-acetylneuraminic acid		N-acetylputrescine
			N-acetylputrescine		n-alpha-acetyl-asparagine
			N-trimethyllysine		NAD+
			NAD+		nicotinamide mononucleotide
			nicotinamide		o-acetyl-serine
			nicotinic acid and/or isonicotinic acid		ophthalmic acid
			o-acetyl-serine		ornithine
			ophthalmic acid		orotic acid
			ornithine		phenylalanine
			orotic acid		pipecolic acid
			phenylalanine		proline
			pipecolic acid		putrescine
			proline		pyridoxamine
			putrescine		pyruvic acid
			pyridoxamine		riboflavin
			S-(5'-adenosyl)-methionine		S-(5'-adenosyl)-homocysteine
			salicylic acid		salicylic acid
			shikimic acid and or isomers		sn-glycero-3-phosphocholine
			sn-glycero-3-phosphocholine		syringic acid
			syringic acid		threonine/allothreonine
			threonine/allothreonine		thymine
			thymine		trisaccharide (ex. raffinose)
			trigonelline		tyramine and or isomers
			trisaccharide (ex. raffinose)		tyrosine
			tryptamine		uracil
			tyramine and or isomers		uric acid and or isomers
			tyrosine		uridine 5'-diphospho-N-acetylhexosamine
			uric acid and or isomers		uridine 5'-diphosphohexose
			uridine 5'-diphospho-N-acetylhexosamine		vanillic acid
			uridine 5'-diphosphohexose		xanthine
			vanillic acid		xanthosine
			xanthurenic acid		xanthurenic acid
Diurnal exudates
EOD-Arabidopsis	EOD-Brachy	EOD-Medicago	EOD-Arabidopsis	EOD-Arabidopsis	EOD-Brachy	EON-Arabidopsis	EON-Arabidopsis	EON-Brachy
EON-Arabidopsis	EON-Brachy	EON-Medicago	EOD-Brachy	EOD-Medicago	EOD-Medicago	EON-Brachy	EON-Medicago	EON-Medicago
24	12	5	50	35	10	16	9	5
3-methyladenine	5'-methylthioadenosine	agmatine sulfuric acid	2',3'-cyclic AMP	2',3'-cyclic AMP	adenine	2',3'-cyclic AMP	adenine	agmatine sulfuric acid
4-guanidinobutanoic acid	adenine	asparagine	3-methyladenine	3-methyladenine	asparagine	4-quinolinecarboxylic acid and isomers	agmatine sulfuric acid	asparagine
4-quinolinecarboxylic acid and isomers	deoxycytidine	glycerol phosphoric acid	4-guanidinobutanoic acid	4-guanidinobutanoic acid	glycerol phosphoric acid	adenine	asparagine	glycerol phosphoric acid
5'-methylthioadenosine	glycerol phosphoric acid	sn-glycero-3-phosphocholine	4-hydroxyproline	4-quinolinecarboxylic acid and isomers	guanosine	adenosine and isomers	betaine	sn-glycero-3-phosphocholine
allantoin	guanine	trigonelline	4-quinolinecarboxylic acid and isomers	5-oxo-proline	histamine	alpha-aminoadipic acid	dihexose (ex. trehalose, melibiose)	trigonelline
alpha-aminoadipic acid	guanosine		5-oxo-proline	5'-methylthioadenosine	indole-3-acetic acid	betaine	glutamic acid
caffeic acid	histamine		5'-methylthioadenosine	adenine	isomer of kynurenine	citrulline	glycerol phosphoric acid
cytosine	indole-3-acetic acid		adenosine and isomers	adenosine and isomers	quinic acid	dihexose (ex. trehalose, melibiose)	trans-cinnamic acid
deoxycarnitine	isomer of 5-methylcytosine		alpha-aminoadipic acid	alpha-aminoadipic acid	sn-glycero-3-phosphocholine	glucuronolactone	trigonelline
dihexose (ex. trehalose, melibiose)	isomer of kynurenine		arginine	asparagine	trigonelline	glutamic acid
ferulic acid	N-acetyl-hexosamine		betaine	caffeic acid		histamine
guanine	quinic acid		caffeic acid	cytidine		histidine
hydroxycinnamic acid			citrulline	cytosine		pipecolic acid
isomer of 5-methylcytosine			cytosine	deoxycarnitine		trans-cinnamic acid
methyl indole-3-acetic acid			deoxycarnitine	dihexose (ex. trehalose, melibiose)		valine and/or norvaline
N-acetyl-glutamic acid			dihexose (ex. sucrose, palatinose)	glutamic acid		xanthine
n-alpha-acetyl-asparagine			dihexose (ex. trehalose, melibiose)	glutamine
N-trimethyllysine			ferulic acid	glycerol phosphoric acid
nicotinic acid and/or isonicotinic acid			fumaric acid	guanine
pantothenic acid			gluconic acid	histidinol
pyridoxine			glucuronolactone	hydroxycinnamic acid
trans-cinnamic acid			glutamic acid	isoleucine
uridine			glutamine	leucine and/or norleucine
xanthine			glycerol phosphoric acid	methyl indole-3-acetic acid
			guanosine	N-acetyl-glutamic acid
			histamine	N-trimethyllysine
			histidine	nicotinic acid and/or isonicotinic acid
			hydroxycinnamic acid	pipecolic acid
			indole-3-acetic acid	salicylic acid
			isoleucine	sn-glycero-3-phosphocholine
			isomer of 5-methylcytosine	trigonelline
			isomer of kynurenine	tyrosine
			leucine and/or norleucine	uridine
			methyl indole-3-acetic acid	valine and/or norvaline
			N-acetyl-glutamic acid	xanthine
			n-alpha-acetyl-asparagine
			N-trimethyllysine
			nicotinic acid and/or isonicotinic acid
			pantothenic acid
			phenylalanine
			pipecolic acid
			proline
			pyridoxine
			quinic acid
			salicylic acid
			thymine
			tyrosine
			uridine
			valine and/or norvaline
			xanthine
